# Supplementary material for: High expression of RUNX1 is associated with poorer outcomes in cytogenetically normal acute myeloid leukemia
Source: PubMed Central journal article supplement (PMC4941280; doi:10.18632/oncotarget.7489), 2016-02-19
Supplement: oncotarget-07-15828-s001.pdf [file oncotarget-07-15828-s001.pdf]

## High expression of *RUNX1* is associated with poorer outcomes in cytogenetically normal acute myeloid leukemia

### Supplementary Materials

**Supplementary Table S1: Patients' characteristics in the validating group of CN-AML according to the *RUNX1* expression**

| Variable                 | <i>RUNX1</i> <sup>high</sup> , n = 81 | <i>RUNX1</i> <sup>low</sup> , n = 81 | P       |
|--------------------------|---------------------------------------|--------------------------------------|---------|
| Median age. y (range)    | 59 (7–81)                             | 56 (20–83)                           | 0.82    |
| Median OS. d (range)     | 223 (3–1176)                          | 416 (1–1176)                         | 0.03    |
| FAB subtype, no          |                                       |                                      |         |
| M0                       | 2                                     | 3                                    | 1       |
| M1                       | 30                                    | 15                                   | 0.014   |
| M2                       | 18                                    | 27                                   | 0.16    |
| M3                       | 0                                     | 0                                    | 1       |
| M4                       | 22                                    | 20                                   | 0.86    |
| M5                       | 8                                     | 11                                   | 0.63    |
| M6                       | 1                                     | 5                                    | 0.21    |
| High <i>ERG</i> , no     | 61                                    | 20                                   | < 0.001 |
| High <i>BAALC</i> , no   | 48                                    | 33                                   | 0.028   |
| High <i>LEF1</i> , no    | 28                                    | 53                                   | < 0.001 |
| High <i>MNI</i> , no     | 44                                    | 37                                   | 0.35    |
| High <i>WT1</i> , no     | 54                                    | 27                                   | < 0.001 |
| High <i>DNMT3B</i> , no  | 56                                    | 25                                   | < 0.001 |
| High <i>TCF4</i> , no    | 60                                    | 21                                   | < 0.001 |
| High <i>ITPR2</i> , no   | 63                                    | 18                                   | < 0.001 |
| High <i>MAPKBPI</i> , no | 58                                    | 23                                   | < 0.001 |

High *ERG*, *BAALC*, *LEF1*, *MNI*, *WT1*, *DNMT3B*, *TCF4*, *ITPR2* and *MAPKBPI* expression were defined as an expression level above the median of all samples, respectively.

**Supplementary Table S2: *RUNX1*-associated gene-expression profile using microarray in the testing group**

| probes       | Symbols      | <i>p</i> -value | Fold change | Mean expression of <i>RUNX1</i> <sup>high</sup> | Mean expression of <i>RUNX1</i> <sup>low</sup> |
|--------------|--------------|-----------------|-------------|-------------------------------------------------|------------------------------------------------|
| 209360_s_at  | RUNX1        | 3.68E-34        | 1.311753    | 9.681265                                        | 8.369512                                       |
| 228280_at    | ZC3HAV1L     | 1.37E-16        | 1.255878    | 8.327701                                        | 7.071823                                       |
| 203151_at    | MAP1A        | 1.77E-16        | 1.239758    | 8.022762                                        | 6.783004                                       |
| 217892_s_at  | LIMA1        | 1.89E-15        | 0.676639    | 7.784194                                        | 7.107555                                       |
| 209537_at    | EXTL2        | 5.47E-15        | 0.856769    | 8.097405                                        | 7.240636                                       |
| 225295_at    | SLC39A10     | 4.59E-15        | 0.814251    | 8.747474                                        | 7.933222                                       |
| 228550_at    | RTN4R        | 5.27E-15        | 0.910439    | 6.692529                                        | 5.782091                                       |
| 223351_at    | C17orf80     | 1.15E-14        | 0.690112    | 7.413718                                        | 6.723606                                       |
| 224959_at    | SLC26A2      | 5.64E-14        | 0.637026    | 8.395491                                        | 7.758465                                       |
| 209434_s_at  | PPAT         | 6.33E-14        | 0.644608    | 6.955966                                        | 6.311358                                       |
| 229530_at    | GUCY1A3      | 1.05E-13        | 1.580208    | 8.302874                                        | 6.722666                                       |
| 227335_at    | DIDO1        | 1.74E-13        | 0.736967    | 7.494155                                        | 6.757188                                       |
| 213391_at    | DPY19L4      | 2.21E-13        | 0.762041    | 6.802641                                        | 6.0406                                         |
| 226721_at    | DPY19L4      | 3.21E-13        | 0.703803    | 7.753397                                        | 7.049594                                       |
| 227426_at    | SOS1         | 3.07E-13        | 0.635517    | 7.875537                                        | 7.24002                                        |
| 239237_at    | LOC100506776 | 3.23E-13        | 1.266409    | 8.29596                                         | 7.029551                                       |
| 218361_at    | GOLPH3L      | 3.89E-13        | 0.83911     | 8.197894                                        | 7.358783                                       |
| 205097_at    | SLC26A2      | 4.34E-13        | 0.763387    | 7.608132                                        | 6.844745                                       |
| 223253_at    | EPDR1        | 6.21E-13        | 1.147946    | 8.758419                                        | 7.610474                                       |
| 206081_at    | SLC24A1      | 7.08E-13        | 0.696113    | 6.15335                                         | 5.457237                                       |
| 212653_s_at  | EHBP1        | 8.41E-13        | 0.68067     | 7.553831                                        | 6.873161                                       |
| 209409_at    | GRB10        | 9.52E-13        | 1.288065    | 8.411074                                        | 7.123009                                       |
| 222589_at    | NLK          | 1.06E-12        | 0.831837    | 8.267342                                        | 7.435505                                       |
| 228095_at    | PHF14        | 1.16E-12        | 0.73065     | 8.454919                                        | 7.72427                                        |
| 221942_s_at  | GUCY1A3      | 1.65E-12        | 1.621215    | 9.099951                                        | 7.478736                                       |
| 212731_at    | ANKRD46      | 1.83E-12        | 0.679341    | 6.939268                                        | 6.259927                                       |
| 218783_at    | INTS7        | 2.05E-12        | 0.675563    | 6.265776                                        | 5.590213                                       |
| 213395_at    | MLC1         | 2.37E-12        | 1.190422    | 8.489091                                        | 7.298668                                       |
| 1555881_s_at | LZTS2        | 3.02E-12        | 0.644231    | 7.859994                                        | 7.215763                                       |
| 227522_at    | CMBL         | 3.01E-12        | 1.235737    | 8.013945                                        | 6.778208                                       |
| 228696_at    | SLC45A3      | 3.35E-12        | 0.889049    | 7.988856                                        | 7.099808                                       |
| 204866_at    | PHF16        | 4.10E-12        | 0.690149    | 6.661758                                        | 5.971609                                       |
| 227461_at    | STON2        | 4.03E-12        | 1.391123    | 7.703123                                        | 6.312001                                       |
| 40472_at     | LPCAT4       | 4.09E-12        | 0.652861    | 7.178933                                        | 6.526072                                       |
| 224746_at    | KIAA1522     | 4.30E-12        | 0.801332    | 6.404184                                        | 5.602852                                       |
| 221652_s_at  | ASUN         | 5.41E-12        | 0.691622    | 9.063173                                        | 8.37155                                        |
| 229983_at    | TIGD2        | 5.90E-12        | 0.613728    | 6.945454                                        | 6.331725                                       |
| 227334_at    | USP54        | 6.82E-12        | 0.650549    | 6.790105                                        | 6.139556                                       |
| 238499_at    | SLC45A3      | 7.59E-12        | 0.82616     | 7.007895                                        | 6.181735                                       |
| 223403_s_at  | POLR1B       | 8.95E-12        | 0.647463    | 7.789318                                        | 7.141855                                       |
| 242414_at    | QPRT         | 9.43E-12        | 1.045506    | 7.57447                                         | 6.528965                                       |

|              |          |          |          |          |          |
|--------------|----------|----------|----------|----------|----------|
| 212828_at    | SYNJ2    | 9.94E-12 | 0.885825 | 7.022216 | 6.13639  |
| 218889_at    | NOC3L    | 1.38E-11 | 0.605745 | 7.732919 | 7.127174 |
| 225543_at    | GTF3C4   | 1.64E-11 | 0.615082 | 6.50118  | 5.886098 |
| 227235_at    | GUCY1A3  | 1.90E-11 | 1.680967 | 8.01135  | 6.330384 |
| 1553218_a_at | ZNF512   | 1.94E-11 | 0.599511 | 8.430813 | 7.831302 |
| 202661_at    | ITPR2    | 2.03E-11 | 0.837715 | 6.131988 | 5.294272 |
| 219497_s_at  | BCL11A   | 2.04E-11 | 1.127098 | 9.235414 | 8.108317 |
| 217263_x_at  | RUNX1    | 2.08E-11 | 0.644412 | 6.210369 | 5.565958 |
| 227026_at    | MPHOSPH8 | 2.08E-11 | 0.598302 | 8.002568 | 7.404266 |
| 213035_at    | ANKRD28  | 2.12E-11 | 0.960183 | 8.405162 | 7.444979 |
| 203372_s_at  | SOCS2    | 2.26E-11 | 1.652714 | 7.630611 | 5.977898 |
| 206067_s_at  | WT1      | 3.30E-11 | 1.354219 | 7.727775 | 6.373556 |
| 202630_at    | APPBP2   | 3.43E-11 | 0.647776 | 7.048086 | 6.40031  |
| 226043_at    | GPSM1    | 3.47E-11 | 1.137794 | 8.489718 | 7.351924 |
| 212170_at    | RBM12    | 3.72E-11 | 0.660824 | 6.597278 | 5.936454 |
| 201664_at    | SMC4     | 3.77E-11 | 0.827573 | 9.984242 | 9.156669 |
| 219372_at    | IFT81    | 4.54E-11 | 0.64351  | 5.838252 | 5.194743 |
| 211181_x_at  | RUNX1    | 5.07E-11 | 0.718017 | 6.635991 | 5.917975 |
| 201069_at    | MMP2     | 5.54E-11 | 1.799152 | 7.976892 | 6.17774  |
| 203373_at    | SOCS2    | 5.84E-11 | 1.675798 | 8.564958 | 6.889161 |
| 214670_at    | ZKSCAN1  | 6.62E-11 | 0.649262 | 8.196284 | 7.547022 |
| 229090_at    | ZEB1-AS1 | 7.40E-11 | 0.668814 | 5.987087 | 5.318273 |
| 225384_at    | DOCK7    | 7.88E-11 | 0.650811 | 7.464311 | 6.8135   |
| 214806_at    | BICD1    | 8.21E-11 | 0.629724 | 5.905583 | 5.275859 |
| 227536_at    | ZC3H13   | 8.63E-11 | 0.693706 | 7.91103  | 7.217324 |
| 229614_at    | ZNF320   | 9.02E-11 | 0.809031 | 6.510343 | 5.701311 |
| 210347_s_at  | BCL11A   | 9.31E-11 | 0.77071  | 8.379278 | 7.608568 |
| 213237_at    | C16orf88 | 1.06E-10 | 0.619919 | 6.23158  | 5.611661 |
| 204044_at    | QPRT     | 1.11E-10 | 1.091554 | 6.691436 | 5.599883 |
| 211793_s_at  | ABI2     | 1.19E-10 | 0.740015 | 7.295337 | 6.555322 |
| 225112_at    | ABI2     | 1.37E-10 | 0.800442 | 7.825411 | 7.024969 |
| 225611_at    | MAST4    | 1.43E-10 | 0.835822 | 7.550219 | 6.714397 |
| 225613_at    | MAST4    | 1.50E-10 | 0.826681 | 6.768808 | 5.942127 |
| 238122_at    | RBM12B   | 1.49E-10 | 0.585472 | 6.720511 | 6.135038 |
| 222742_s_at  | RABL5    | 1.52E-10 | 0.739888 | 6.628553 | 5.888665 |
| 211180_x_at  | RUNX1    | 1.68E-10 | 0.617015 | 6.932926 | 6.315911 |
| 209014_at    | MAGED1   | 1.89E-10 | 0.791657 | 9.06096  | 8.269303 |
| 226157_at    | TFDP2    | 1.92E-10 | 0.962232 | 9.333389 | 8.371158 |
| 219615_s_at  | KCNK5    | 1.96E-10 | 1.048902 | 7.155858 | 6.106956 |
| 226098_at    | IFT80    | 2.12E-10 | 0.650002 | 8.027738 | 7.377736 |
| 224827_at    | UBTD2    | 2.34E-10 | 0.656654 | 7.770819 | 7.114165 |
| 225237_s_at  | MSI2     | 2.42E-10 | 1.255849 | 9.39492  | 8.139072 |
| 203735_x_at  | PPFIBP1  | 2.45E-10 | 0.718166 | 7.225566 | 6.5074   |
| 202561_at    | TNKS     | 2.93E-10 | 0.617221 | 7.363787 | 6.746567 |
| 201243_s_at  | ATP1B1   | 3.11E-10 | 1.070357 | 8.81351  | 7.743154 |

|              |           |          |          |          |          |
|--------------|-----------|----------|----------|----------|----------|
| 219498_s_at  | BCL11A    | 3.13E-10 | 0.950582 | 8.313535 | 7.362953 |
| 228920_at    | ZNF260    | 3.21E-10 | 0.629619 | 6.630745 | 6.001126 |
| 213005_s_at  | KANK1     | 3.24E-10 | 0.89935  | 7.755941 | 6.856591 |
| 220992_s_at  | TRMT1L    | 3.39E-10 | 0.650217 | 6.992926 | 6.342709 |
| 227604_at    | TMEM185B  | 3.71E-10 | 0.586977 | 6.05621  | 5.469233 |
| 238050_at    | ANTXR2    | 4.55E-10 | 0.649476 | 6.260733 | 5.611257 |
| 212274_at    | LPIN1     | 4.75E-10 | 0.598481 | 7.298144 | 6.699663 |
| 228397_at    | TUG1      | 4.99E-10 | 0.661525 | 6.986701 | 6.325176 |
| 230178_s_at  | ELP2      | 5.01E-10 | 0.644267 | 6.856106 | 6.211839 |
| 1559078_at   | BCL11A    | 5.89E-10 | 0.916715 | 7.161695 | 6.24498  |
| 204341_at    | TRIM16    | 6.00E-10 | 0.813715 | 7.243345 | 6.429629 |
| 55872_at     | ZNF512B   | 6.74E-10 | 0.647865 | 7.887559 | 7.239694 |
| 222891_s_at  | BCL11A    | 6.83E-10 | 1.085605 | 9.086235 | 8.000631 |
| 225240_s_at  | MSI2      | 6.94E-10 | 1.177446 | 9.750959 | 8.573513 |
| 229971_at    | GPR114    | 7.83E-10 | 0.908985 | 7.60908  | 6.700096 |
| 222457_s_at  | LIMA1     | 7.96E-10 | 0.623839 | 5.84958  | 5.225742 |
| 1558700_s_at | ZNF260    | 8.10E-10 | 0.651056 | 6.188681 | 5.537626 |
| 210694_s_at  | MID1      | 9.40E-10 | 0.64261  | 6.35615  | 5.71354  |
| 230298_at    | MBLAC2    | 1.05E-09 | 0.667036 | 7.280972 | 6.613935 |
| 212405_s_at  | METTL13   | 1.07E-09 | 0.617068 | 8.059085 | 7.442016 |
| 241365_at    | SATB1     | 1.09E-09 | 0.682854 | 7.377938 | 6.695084 |
| 235852_at    | STON2     | 1.12E-09 | 1.103987 | 6.397485 | 5.293499 |
| 204484_at    | PIK3C2B   | 1.15E-09 | 0.950514 | 7.777493 | 6.826979 |
| 235151_at    | LOC283357 | 1.17E-09 | 0.682919 | 6.629435 | 5.946517 |
| 215146_s_at  | TTC28     | 1.19E-09 | 0.743805 | 6.541984 | 5.798179 |
| 225098_at    | ABI2      | 1.19E-09 | 0.915933 | 7.649941 | 6.734008 |
| 228171_s_at  | PLEKHG4   | 1.25E-09 | 0.692028 | 6.750913 | 6.058885 |
| 226085_at    | CBX5      | 1.34E-09 | 0.731947 | 8.804413 | 8.072465 |
| 201663_s_at  | SMC4      | 1.37E-09 | 0.842318 | 9.672025 | 8.829706 |
| 212276_at    | LPIN1     | 1.38E-09 | 0.610847 | 8.448127 | 7.83728  |
| 218694_at    | ARMCX1    | 1.40E-09 | 0.837175 | 7.060708 | 6.223533 |
| 207011_s_at  | PTK7      | 1.48E-09 | 0.884413 | 6.281164 | 5.396751 |
| 228442_at    | NFATC2    | 1.48E-09 | 0.837461 | 7.321464 | 6.484004 |
| 236738_at    | C3orf80   | 1.56E-09 | 1.628542 | 7.682784 | 6.054241 |
| 205624_at    | CPA3      | 1.73E-09 | 1.879526 | 9.735435 | 7.855909 |
| 218966_at    | MYO5C     | 1.79E-09 | 0.782115 | 7.590253 | 6.808138 |
| 209386_at    | TM4SF1    | 1.87E-09 | 1.280377 | 7.292272 | 6.011895 |
| 226299_at    | PKN3      | 2.28E-09 | 0.728137 | 6.168645 | 5.440508 |
| 1557953_at   | ZKSCAN1   | 2.37E-09 | 0.628656 | 7.753049 | 7.124393 |
| 227569_at    | LNX2      | 2.38E-09 | 0.616788 | 6.505421 | 5.888633 |
| 211182_x_at  | RUNX1     | 2.63E-09 | 0.856856 | 6.555879 | 5.699024 |
| 212186_at    | ACACA     | 2.69E-09 | 0.881249 | 7.453035 | 6.571787 |
| 222819_at    | CTPS2     | 2.70E-09 | 0.588708 | 7.239247 | 6.650538 |
| 212070_at    | GPR56     | 2.76E-09 | 1.595233 | 8.231286 | 6.636054 |
| 219330_at    | VANGL1    | 2.80E-09 | 0.780673 | 7.250418 | 6.469744 |

|              |          |          |          |          |          |
|--------------|----------|----------|----------|----------|----------|
| 207160_at    | IL12A    | 2.89E-09 | 0.590672 | 5.586478 | 4.995807 |
| 242628_at    | KLRB1    | 2.97E-09 | 0.586534 | 5.711758 | 5.125224 |
| 224722_at    | MIB1     | 2.99E-09 | 0.649566 | 6.905868 | 6.256302 |
| 228654_at    | SPIN4    | 3.01E-09 | 0.900944 | 8.821685 | 7.920741 |
| 213610_s_at  | KLHL23   | 3.04E-09 | 0.873247 | 6.61238  | 5.739133 |
| 218318_s_at  | NLK      | 3.76E-09 | 0.604541 | 6.988508 | 6.383967 |
| 213058_at    | TTC28    | 3.81E-09 | 0.611031 | 6.502538 | 5.891507 |
| 213891_s_at  | TCF4     | 4.40E-09 | 1.010695 | 8.391064 | 7.380369 |
| 226327_at    | ZNF507   | 4.79E-09 | 0.587414 | 6.675385 | 6.087972 |
| 206188_at    | ZNF623   | 5.09E-09 | 0.644524 | 6.351424 | 5.706901 |
| 218437_s_at  | LZTFL1   | 5.90E-09 | 0.632234 | 7.652091 | 7.019857 |
| 206478_at    | KIAA0125 | 6.14E-09 | 1.317048 | 9.120244 | 7.803197 |
| 203139_at    | DAPK1    | 6.23E-09 | 0.80582  | 9.240368 | 8.434548 |
| 230266_at    | RAB7B    | 6.26E-09 | 0.997714 | 7.265511 | 6.267797 |
| 202662_s_at  | ITPR2    | 6.61E-09 | 0.597469 | 7.112503 | 6.515034 |
| 206954_at    | WT1-AS   | 6.87E-09 | 0.706167 | 5.622387 | 4.91622  |
| 235604_x_at  | ZNF493   | 8.02E-09 | 0.644125 | 6.610064 | 5.965939 |
| 224901_at    | SCD5     | 8.78E-09 | 0.838157 | 6.754203 | 5.916045 |
| 239580_at    | GUCY1A3  | 8.78E-09 | 1.160071 | 6.30121  | 5.141139 |
| 210365_at    | RUNX1    | 8.99E-09 | 0.894292 | 7.856704 | 6.962412 |
| 201242_s_at  | ATP1B1   | 9.36E-09 | 1.098107 | 9.116725 | 8.018619 |
| 202660_at    | ITPR2    | 1.08E-08 | 0.64533  | 7.94127  | 7.29594  |
| 212692_s_at  | LRBA     | 1.10E-08 | 0.591174 | 8.485203 | 7.894029 |
| 218689_at    | FANCF    | 1.12E-08 | 0.736392 | 6.739004 | 6.002612 |
| 218792_s_at  | BSPRY    | 1.16E-08 | 0.724867 | 6.751989 | 6.027122 |
| 230434_at    | PHOSPHO2 | 1.28E-08 | 0.637819 | 6.625965 | 5.988146 |
| 212387_at    | TCF4     | 1.30E-08 | 0.902643 | 7.85296  | 6.950317 |
| 217975_at    | WBP5     | 1.46E-08 | 1.145313 | 7.822912 | 6.677599 |
| 207426_s_at  | TNFSF4   | 1.50E-08 | 0.738166 | 7.500857 | 6.762691 |
| 215471_s_at  | MAP7     | 1.50E-08 | 0.950887 | 7.04723  | 6.096343 |
| 218984_at    | PUS7     | 1.53E-08 | 0.637653 | 7.457865 | 6.820213 |
| 232007_at    | AGPAT5   | 1.60E-08 | 0.758791 | 7.173154 | 6.414363 |
| 223382_s_at  | ZNRF1    | 1.60E-08 | 0.660617 | 8.871701 | 8.211084 |
| 209627_s_at  | OSBPL3   | 1.70E-08 | 0.655407 | 7.418257 | 6.76285  |
| 226771_at    | ATP8B2   | 1.74E-08 | 0.957116 | 7.605852 | 6.648736 |
| 218710_at    | TTC27    | 1.83E-08 | 0.734191 | 8.010629 | 7.276438 |
| 226889_at    | WDR35    | 1.86E-08 | 0.5946   | 7.191059 | 6.59646  |
| 244043_at    | TFDP2    | 1.95E-08 | 0.795148 | 7.053123 | 6.257974 |
| 218641_at    | C11orf95 | 2.05E-08 | 0.704776 | 7.491804 | 6.787028 |
| 204040_at    | RNF144A  | 2.12E-08 | 0.750279 | 7.75904  | 7.00876  |
| 223268_at    | C11orf54 | 2.15E-08 | 0.59396  | 8.009487 | 7.415527 |
| 224953_at    | YIPF5    | 2.20E-08 | 0.713402 | 7.326959 | 6.613557 |
| 223599_at    | TRIM6    | 2.38E-08 | 0.941034 | 6.438198 | 5.497164 |
| 1558956_s_at | IFT80    | 2.42E-08 | 0.702345 | 8.123645 | 7.421301 |
| 202252_at    | RAB13    | 2.52E-08 | 0.976817 | 8.81867  | 7.841853 |

|              |          |          |          |          |          |
|--------------|----------|----------|----------|----------|----------|
| 225081_s_at  | CDCA7L   | 2.84E-08 | 0.835734 | 9.288104 | 8.45237  |
| 223075_s_at  | AIF1L    | 3.03E-08 | 1.132528 | 6.850402 | 5.717874 |
| 202889_x_at  | MAP7     | 3.08E-08 | 0.949628 | 6.645113 | 5.695486 |
| 212599_at    | AUTS2    | 3.13E-08 | 0.851538 | 7.547799 | 6.696262 |
| 213258_at    | TFPI     | 3.54E-08 | 1.158978 | 7.84644  | 6.687462 |
| 213394_at    | MAPKBP1  | 4.04E-08 | 0.889245 | 6.912516 | 6.02327  |
| 233461_x_at  | ZNF226   | 4.17E-08 | 0.870445 | 6.293058 | 5.422613 |
| 238043_at    | ARID1B   | 4.25E-08 | 0.65737  | 7.754008 | 7.096638 |
| 210958_s_at  | MAST4    | 4.41E-08 | 0.627104 | 6.272856 | 5.645752 |
| 222746_s_at  | BSPRY    | 4.49E-08 | 0.85725  | 7.400879 | 6.543628 |
| 206582_s_at  | GPR56    | 5.01E-08 | 1.139251 | 6.471457 | 5.332205 |
| 222451_s_at  | ZDHHC9   | 5.01E-08 | 0.917335 | 6.704761 | 5.787426 |
| 225671_at    | SPNS2    | 5.70E-08 | 0.86535  | 7.792498 | 6.927147 |
| 205739_x_at  | ZNF107   | 6.30E-08 | 0.593262 | 7.207121 | 6.613859 |
| 225550_at    | CNST     | 6.34E-08 | 0.655581 | 7.237765 | 6.582183 |
| 218596_at    | TBC1D13  | 6.46E-08 | 0.884317 | 6.561023 | 5.676706 |
| 229492_at    | VANGL1   | 6.53E-08 | 0.929416 | 6.104295 | 5.174878 |
| 222594_s_at  | SPATS2   | 6.73E-08 | 0.590331 | 6.06967  | 5.47934  |
| 212775_at    | OBSL1    | 6.77E-08 | 1.252799 | 7.251761 | 5.998962 |
| 238418_at    | SLC35B4  | 6.78E-08 | 0.634012 | 6.828204 | 6.194192 |
| 203685_at    | BCL2     | 6.82E-08 | 0.71907  | 8.091367 | 7.372297 |
| 207877_s_at  | NVL      | 7.28E-08 | 0.625757 | 5.703095 | 5.077338 |
| 238732_at    | COL24A1  | 7.29E-08 | 1.068372 | 7.123518 | 6.055145 |
| 205527_s_at  | GEMIN4   | 7.40E-08 | 0.588464 | 7.130536 | 6.542073 |
| 238021_s_at  | CRNDE    | 8.38E-08 | 1.534486 | 8.135111 | 6.600625 |
| 202890_at    | MAP7     | 8.93E-08 | 1.233649 | 7.855193 | 6.621544 |
| 223961_s_at  | CISH     | 9.10E-08 | 0.777771 | 6.709052 | 5.931281 |
| 225959_s_at  | ZNRF1    | 9.62E-08 | 0.603358 | 8.171118 | 7.56776  |
| 212110_at    | SLC39A14 | 9.99E-08 | 0.589674 | 6.810692 | 6.221018 |
| 232489_at    | TRMT13   | 1.05E-07 | 0.637991 | 6.873011 | 6.235019 |
| 223513_at    | CENPJ    | 1.10E-07 | 0.665195 | 7.539537 | 6.874342 |
| 219553_at    | NME7     | 1.10E-07 | 0.64602  | 7.258876 | 6.612857 |
| 205497_at    | ZNF175   | 1.13E-07 | 0.600278 | 6.694774 | 6.094496 |
| 212386_at    | TCF4     | 1.13E-07 | 0.978415 | 9.026603 | 8.048188 |
| 229572_at    | ATP6V0A2 | 1.14E-07 | 0.705652 | 7.539911 | 6.83426  |
| 235900_at    | SPNS3    | 1.15E-07 | 1.005015 | 7.786844 | 6.78183  |
| 225551_at    | CNST     | 1.18E-07 | 0.621014 | 7.174039 | 6.553025 |
| 1553982_a_at | RAB7B    | 1.19E-07 | 0.965948 | 6.956019 | 5.990071 |
| 40016_g_at   | MAST4    | 1.19E-07 | 0.814327 | 6.294002 | 5.479675 |
| 213541_s_at  | ERG      | 1.25E-07 | 1.009922 | 7.931104 | 6.921182 |
| 205190_at    | PLS1     | 1.27E-07 | 0.942638 | 6.482297 | 5.53966  |
| 217841_s_at  | PPME1    | 1.30E-07 | 0.622004 | 7.249404 | 6.627401 |
| 225485_at    | CEP41    | 1.39E-07 | 0.630987 | 7.182834 | 6.551847 |
| 228174_at    | SCAI     | 1.45E-07 | 0.616443 | 7.168679 | 6.552236 |
| 224847_at    | CDK6     | 1.47E-07 | 0.797717 | 10.88061 | 10.08289 |

|             |           |          |          |          |          |
|-------------|-----------|----------|----------|----------|----------|
| 220918_at   | RUNX1-IT1 | 1.52E-07 | 0.702144 | 7.06045  | 6.358306 |
| 227792_at   | ITPRIPL2  | 1.65E-07 | 0.917805 | 7.808187 | 6.890382 |
| 231319_x_at | KIF9      | 1.79E-07 | 0.639944 | 7.161309 | 6.521366 |
| 218762_at   | ZNF574    | 1.83E-07 | 0.734697 | 6.894685 | 6.159987 |
| 229997_at   | VANGL1    | 1.84E-07 | 0.970547 | 7.079994 | 6.109447 |
| 223404_s_at | TRMT1L    | 1.84E-07 | 0.642233 | 7.180933 | 6.5387   |
| 216705_s_at | ADA       | 1.90E-07 | 1.061197 | 8.809603 | 7.748407 |
| 227766_at   | LIG4      | 1.91E-07 | 0.607359 | 6.924523 | 6.317165 |
| 203865_s_at | ADARB1    | 2.01E-07 | 0.637591 | 6.632222 | 5.994631 |
| 219602_s_at | PIEZO2    | 2.11E-07 | 0.840759 | 6.211832 | 5.371072 |
| 222240_s_at | ISYNA1    | 2.29E-07 | 0.666745 | 7.564657 | 6.897912 |
| 227798_at   | SMAD1     | 2.32E-07 | 0.783278 | 7.570494 | 6.787217 |
| 202813_at   | TARBP1    | 2.35E-07 | 0.669412 | 8.846837 | 8.177426 |
| 223758_s_at | GTF2H2    | 2.40E-07 | 0.595513 | 7.488536 | 6.893022 |
| 201440_at   | DDX23     | 2.45E-07 | 0.690613 | 7.211156 | 6.520544 |
| 203608_at   | ALDH5A1   | 2.82E-07 | 1.009942 | 8.146988 | 7.137046 |
| 226991_at   | NFATC2    | 2.87E-07 | 0.862183 | 6.629454 | 5.767271 |
| 236837_x_at | MIPEPP3   | 3.04E-07 | 0.622202 | 6.008464 | 5.386262 |
| 220668_s_at | DNMT3B    | 3.05E-07 | 0.689914 | 7.963872 | 7.273958 |
| 204639_at   | ADA       | 3.07E-07 | 0.938825 | 9.363046 | 8.424221 |
| 219353_at   | NHLRC2    | 3.10E-07 | 0.635158 | 6.355975 | 5.720818 |
| 229838_at   | NUCB2     | 3.33E-07 | 0.614985 | 8.61494  | 7.999955 |
| 230381_at   | C1orf186  | 3.32E-07 | 0.868651 | 8.3686   | 7.499949 |
| 210999_s_at | GRB10     | 3.38E-07 | 0.899695 | 7.496669 | 6.596974 |
| 243963_at   | SDCCAG8   | 3.40E-07 | 0.59286  | 6.911274 | 6.318414 |
| 213489_at   | MAPRE2    | 3.45E-07 | 0.773439 | 5.700956 | 4.927516 |
| 210993_s_at | SMAD1     | 3.75E-07 | 0.690496 | 7.203781 | 6.513286 |
| 221031_s_at | APOLD1    | 3.81E-07 | 0.590035 | 5.63371  | 5.043675 |
| 219036_at   | CEP70     | 4.08E-07 | 0.814867 | 7.017674 | 6.202807 |
| 201596_x_at | KRT18     | 4.72E-07 | 1.239223 | 7.185003 | 5.945779 |
| 222146_s_at | TCF4      | 5.46E-07 | 0.799326 | 7.685545 | 6.886219 |
| 218397_at   | FANCL     | 5.58E-07 | 0.615572 | 8.081972 | 7.4664   |
| 242260_at   | MATR3     | 6.02E-07 | 0.743644 | 7.874953 | 7.131309 |
| 231897_at   | PTGR1     | 6.08E-07 | 0.614372 | 6.120257 | 5.505885 |
| 227329_at   | ZBTB46    | 6.38E-07 | 0.603366 | 6.486488 | 5.883122 |
| 206148_at   | IL3RA     | 6.45E-07 | 0.981564 | 6.89698  | 5.915416 |
| 212651_at   | RHOBTB1   | 6.52E-07 | 0.750917 | 6.476541 | 5.725624 |
| 223475_at   | CRISPLD1  | 7.22E-07 | 0.692003 | 6.437091 | 5.745089 |
| 239232_at   | MSI2      | 7.29E-07 | 0.633894 | 7.11738  | 6.483486 |
| 201564_s_at | FSCN1     | 7.42E-07 | 0.92634  | 7.132529 | 6.206189 |
| 202862_at   | FAH       | 7.89E-07 | 0.590804 | 7.778463 | 7.18766  |
| 225046_at   | LOC389831 | 7.96E-07 | 0.852286 | 6.795989 | 5.943703 |
| 221223_x_at | CISH      | 8.08E-07 | 0.587588 | 7.614699 | 7.027111 |
| 227908_at   | TBC1D24   | 8.22E-07 | 0.614715 | 6.510785 | 5.896071 |
| 222811_at   | FTSJD1    | 9.00E-07 | 0.595697 | 7.859019 | 7.263322 |

|              |              |          |          |          |          |
|--------------|--------------|----------|----------|----------|----------|
| 202932_at    | YES1         | 9.03E-07 | 0.796689 | 6.670322 | 5.873632 |
| 241376_at    | LOC100130097 | 9.08E-07 | 0.630471 | 6.975627 | 6.345155 |
| 226025_at    | ANKRD28      | 9.28E-07 | 0.698185 | 10.2299  | 9.531716 |
| 203753_at    | TCF4         | 9.34E-07 | 0.785689 | 8.134384 | 7.348695 |
| 223627_at    | MEX3B        | 9.46E-07 | 0.820627 | 6.901553 | 6.080926 |
| 204429_s_at  | SLC2A5       | 1.00E-06 | 0.617154 | 8.045323 | 7.428169 |
| 222603_at    | ERMP1        | 1.01E-06 | 0.640615 | 8.67168  | 8.031065 |
| 1552364_s_at | MSI2         | 1.11E-06 | 0.728851 | 6.681239 | 5.952388 |
| 241926_s_at  | ERG          | 1.12E-06 | 0.781151 | 6.99762  | 6.21647  |
| 210473_s_at  | GPR125       | 1.21E-06 | 0.917457 | 6.975635 | 6.058179 |
| 224848_at    | CDK6         | 1.22E-06 | 0.772126 | 10.33227 | 9.560144 |
| 218096_at    | AGPAT5       | 1.23E-06 | 0.620626 | 9.300837 | 8.680211 |
| 205227_at    | IL1RAP       | 1.34E-06 | 0.892905 | 8.364958 | 7.472054 |
| 238022_at    | CRNDE        | 1.35E-06 | 1.115255 | 6.753048 | 5.637794 |
| 243579_at    | MSI2         | 1.42E-06 | 0.89907  | 7.089033 | 6.189963 |
| 206674_at    | FLT3         | 1.54E-06 | 0.770561 | 10.22171 | 9.451144 |
| 224851_at    | CDK6         | 1.72E-06 | 0.741963 | 11.3552  | 10.61323 |
| 225233_at    | MSI2         | 1.75E-06 | 0.948288 | 6.690636 | 5.742348 |
| 215143_at    | DPY19L2P2    | 1.88E-06 | 0.59268  | 6.548085 | 5.955405 |
| 203069_at    | SV2A         | 1.88E-06 | 0.825813 | 6.773621 | 5.947808 |
| 228885_at    | MAMDC2       | 1.96E-06 | 1.358977 | 7.652703 | 6.293726 |
| 1554067_at   | C12orf66     | 1.99E-06 | 0.663762 | 7.617666 | 6.953904 |
| 232232_s_at  | SLC22A16     | 2.02E-06 | 0.590903 | 7.902477 | 7.311574 |
| 228245_s_at  | OVOS2        | 2.05E-06 | 0.596314 | 7.395387 | 6.799074 |
| 201427_s_at  | SEPP1        | 2.29E-06 | 1.72918  | 9.309376 | 7.580196 |
| 212382_at    | TCF4         | 2.41E-06 | 0.823085 | 7.627322 | 6.804237 |
| 239162_at    | DAPK1-IT1    | 2.56E-06 | 0.606295 | 6.651312 | 6.045016 |
| 219871_at    | FLJ13197     | 2.72E-06 | 0.904319 | 7.407447 | 6.503129 |
| 215116_s_at  | DNM1         | 2.74E-06 | 0.795653 | 6.368983 | 5.57333  |
| 213670_x_at  | NSUN5P1      | 2.84E-06 | 0.586963 | 8.095171 | 7.508208 |
| 226550_at    | SLC9A1       | 2.86E-06 | 0.631609 | 7.97686  | 7.345251 |
| 215034_s_at  | TM4SF1       | 2.86E-06 | 0.895439 | 5.896306 | 5.000867 |
| 205051_s_at  | KIT          | 3.01E-06 | 1.154241 | 9.10535  | 7.95111  |
| 203688_at    | PKD2         | 3.04E-06 | 0.612595 | 8.010914 | 7.398319 |
| 205609_at    | ANGPT1       | 3.30E-06 | 1.083521 | 8.787223 | 7.703702 |
| 206589_at    | GFI1         | 3.31E-06 | 0.862855 | 7.952539 | 7.089684 |
| 225238_at    | MSI2         | 3.41E-06 | 0.70299  | 5.909288 | 5.206297 |
| 241682_at    | KLHL23       | 3.49E-06 | 0.696462 | 6.049998 | 5.353536 |
| 212385_at    | TCF4         | 3.54E-06 | 0.752461 | 7.274326 | 6.521865 |
| 222659_at    | IPO11        | 3.67E-06 | 0.623239 | 6.816933 | 6.193695 |
| 209930_s_at  | NFE2         | 3.72E-06 | 0.667803 | 9.656321 | 8.988518 |
| 214375_at    | PPFIBP1      | 3.82E-06 | 0.602649 | 6.184658 | 5.582009 |
| 221286_s_at  | MZB1         | 3.93E-06 | 0.829156 | 7.046695 | 6.217538 |
| 203588_s_at  | TFDP2        | 4.04E-06 | 0.682948 | 7.884271 | 7.201323 |
| 216953_s_at  | WT1          | 4.22E-06 | 0.799979 | 5.801284 | 5.001305 |



|              |           |          |          |          |          |
|--------------|-----------|----------|----------|----------|----------|
| 200986_at    | SERPING1  | 4.24E-06 | 0.814006 | 7.547773 | 6.733766 |
| 202431_s_at  | MYC       | 4.95E-06 | 0.790635 | 9.747933 | 8.957297 |
| 205349_at    | GNA15     | 5.05E-06 | 0.635243 | 9.740821 | 9.105578 |
| 202566_s_at  | SVIL      | 5.35E-06 | 0.598317 | 7.085578 | 6.487261 |
| 219412_at    | RAB38     | 5.50E-06 | 0.789684 | 5.750217 | 4.960533 |
| 209710_at    | GATA2     | 5.58E-06 | 0.886481 | 8.678826 | 7.792346 |
| 226545_at    | CD109     | 5.98E-06 | 0.90883  | 6.708223 | 5.799393 |
| 204798_at    | MYB       | 6.04E-06 | 0.653744 | 11.25563 | 10.60188 |
| 223319_at    | GPHN      | 6.25E-06 | 0.622636 | 5.975942 | 5.353306 |
| 227492_at    | OCLN      | 6.28E-06 | 0.733578 | 7.99306  | 7.259482 |
| 1554489_a_at | CEP70     | 6.33E-06 | 0.763973 | 6.909789 | 6.145816 |
| 229638_at    | IRX3      | 6.38E-06 | 1.444278 | 7.277347 | 5.833068 |
| 205229_s_at  | COCH      | 6.71E-06 | 0.850076 | 6.744175 | 5.894099 |
| 202933_s_at  | YES1      | 6.74E-06 | 0.742702 | 7.067304 | 6.324602 |
| 215248_at    | GRB10     | 6.79E-06 | 0.721284 | 6.80954  | 6.088257 |
| 228988_at    | ZNF711    | 8.86E-06 | 1.132186 | 6.952875 | 5.820689 |
| 220744_s_at  | IFT122    | 9.02E-06 | 0.710613 | 6.754032 | 6.043419 |
| 224150_s_at  | CEP70     | 9.12E-06 | 0.713851 | 6.988393 | 6.274542 |
| 225285_at    | BCAT1     | 9.28E-06 | 0.998204 | 8.319482 | 7.321277 |
| 212776_s_at  | OBSL1     | 9.42E-06 | 0.980993 | 6.100075 | 5.119083 |
| 209387_s_at  | TM4SF1    | 9.62E-06 | 0.974107 | 6.257496 | 5.283389 |
| 204083_s_at  | TPM2      | 9.81E-06 | 0.657273 | 6.169001 | 5.511728 |
| 202718_at    | IGFBP2    | 1.04E-05 | 1.340763 | 7.452017 | 6.111254 |
| 205375_at    | MDFI      | 1.07E-05 | 0.674172 | 6.064444 | 5.390272 |
| 220643_s_at  | FAIM      | 1.15E-05 | 0.593305 | 6.944301 | 6.350996 |
| 226517_at    | BCAT1     | 1.15E-05 | 0.888401 | 7.587341 | 6.69894  |
| 222632_s_at  | LZTFL1    | 1.16E-05 | 0.658997 | 6.138986 | 5.479989 |
| 213460_x_at  | NSUN5P2   | 1.17E-05 | 0.614559 | 7.977143 | 7.362584 |
| 213110_s_at  | COL4A5    | 1.26E-05 | 1.267014 | 7.614152 | 6.347138 |
| 225532_at    | CABLES1   | 1.39E-05 | 0.618432 | 6.499303 | 5.880871 |
| 1568619_s_at | ITPRIPL2  | 1.41E-05 | 0.679959 | 7.484201 | 6.804242 |
| 1555842_at   | CYTH2     | 1.42E-05 | 0.614816 | 6.101713 | 5.486897 |
| 220377_at    | KIAA0125  | 1.43E-05 | 1.192792 | 7.548698 | 6.355906 |
| 229507_at    | FAM212A   | 1.45E-05 | 0.600668 | 6.133917 | 5.533249 |
| 203787_at    | SSBP2     | 1.45E-05 | 0.654673 | 8.670148 | 8.015476 |
| 1557137_at   | TMEM17    | 1.48E-05 | 0.588843 | 5.670979 | 5.082136 |
| 227574_at    | OBSL1     | 1.48E-05 | 0.752814 | 6.122229 | 5.369414 |
| 221606_s_at  | HMG5      | 1.5E-05  | 0.643363 | 6.355236 | 5.711873 |
| 210299_s_at  | FHL1      | 1.54E-05 | 0.834806 | 7.188513 | 6.353707 |
| 206341_at    | IL2RA     | 1.57E-05 | 0.683231 | 5.875505 | 5.192274 |
| 243010_at    | MSI2      | 1.63E-05 | 0.722749 | 6.939891 | 6.217143 |
| 214452_at    | BCAT1     | 1.67E-05 | 0.59985  | 6.238708 | 5.638858 |
| 225802_at    | TOP1MT    | 1.69E-05 | 0.678636 | 8.048546 | 7.36991  |
| 230541_at    | LOC149134 | 1.75E-05 | 0.747878 | 6.250525 | 5.502647 |
| 215016_x_at  | DST       | 1.81E-05 | 0.718186 | 6.463993 | 5.745807 |

|              |          |          |          |          |          |
|--------------|----------|----------|----------|----------|----------|
| 204624_at    | ATP7B    | 1.85E-05 | 0.629626 | 6.26686  | 5.637233 |
| 205608_s_at  | ANGPT1   | 1.89E-05 | 0.838176 | 8.757174 | 7.918998 |
| 218795_at    | ACP6     | 2.11E-05 | 0.589277 | 6.952726 | 6.363449 |
| 209676_at    | TFPI     | 2.19E-05 | 0.676017 | 6.167455 | 5.491438 |
| 225962_at    | ZNRF1    | 2.23E-05 | 0.755265 | 6.527077 | 5.771812 |
| 1552908_at   | GCSAML   | 2.24E-05 | 0.88248  | 6.848481 | 5.966001 |
| 219922_s_at  | LTBP3    | 2.32E-05 | 0.658066 | 7.204799 | 6.546734 |
| 220952_s_at  | PLEKHA5  | 2.35E-05 | 0.704598 | 7.683536 | 6.978938 |
| 217974_at    | TM7SF3   | 2.39E-05 | 0.598464 | 8.023228 | 7.424763 |
| 201540_at    | FHL1     | 2.44E-05 | 1.007672 | 8.572693 | 7.565021 |
| 206233_at    | B4GALT6  | 2.48E-05 | 0.841437 | 7.661901 | 6.820464 |
| 39248_at     | AQP3     | 2.49E-05 | 0.833954 | 7.115426 | 6.281471 |
| 214039_s_at  | LAPTM4B  | 2.62E-05 | 1.238673 | 9.122628 | 7.883955 |
| 224516_s_at  | CXXC5    | 2.63E-05 | 0.625382 | 9.779658 | 9.154276 |
| 219654_at    | PTPLA    | 2.66E-05 | 0.698135 | 7.369579 | 6.671445 |
| 212764_at    | ZEB1     | 2.73E-05 | 0.692822 | 7.024449 | 6.331627 |
| 212254_s_at  | DST      | 2.82E-05 | 0.712088 | 6.348676 | 5.636588 |
| 223374_s_at  | B3GALNT1 | 2.83E-05 | 0.630228 | 6.898272 | 6.268044 |
| 1555600_s_at | APOL4    | 3.2E-05  | 0.723707 | 6.115384 | 5.391676 |
| 215111_s_at  | TSC22D1  | 3.45E-05 | 0.79458  | 9.882944 | 9.088364 |
| 215440_s_at  | BEX4     | 3.47E-05 | 0.728113 | 8.937329 | 8.209216 |
| 201417_at    | SOX4     | 3.5E-05  | 0.70002  | 10.90419 | 10.20417 |
| 1554679_a_at | LAPTM4B  | 3.61E-05 | 1.002147 | 7.772053 | 6.769906 |
| 204430_s_at  | SLC2A5   | 3.61E-05 | 0.846528 | 8.242106 | 7.395578 |
| 224759_s_at  | C12orf23 | 3.66E-05 | 0.678772 | 7.600641 | 6.921869 |
| 224049_at    | KCNK17   | 3.77E-05 | 0.681965 | 7.645702 | 6.963737 |
| 231899_at    | ZC3H12C  | 4.12E-05 | 0.670962 | 5.967772 | 5.29681  |
| 210933_s_at  | FSCN1    | 4.16E-05 | 0.798445 | 8.32634  | 7.527896 |
| 209702_at    | FTO      | 4.2E-05  | 0.701409 | 8.891552 | 8.190143 |
| 205801_s_at  | RASGRP3  | 4.36E-05 | 0.9947   | 7.653915 | 6.659215 |
| 202351_at    | ITGAV    | 4.39E-05 | 0.626726 | 7.14063  | 6.513904 |
| 236562_at    | ZNF439   | 4.47E-05 | 0.662357 | 6.543027 | 5.88067  |
| 210805_x_at  | RUNX1    | 4.85E-05 | 0.616925 | 5.694689 | 5.077765 |
| 209191_at    | TUBB6    | 5.1E-05  | 0.932368 | 8.631533 | 7.699166 |
| 208767_s_at  | LAPTM4B  | 5.28E-05 | 0.898084 | 8.259822 | 7.361738 |
| 210612_s_at  | SYNJ2    | 5.51E-05 | 0.642691 | 5.608628 | 4.965937 |
| 201418_s_at  | SOX4     | 5.79E-05 | 0.94421  | 8.740306 | 7.796096 |
| 206331_at    | CALCRL   | 6.1E-05  | 0.660068 | 5.794831 | 5.134763 |
| 1554242_a_at | COCH     | 6.23E-05 | 0.686721 | 6.016401 | 5.32968  |
| 211071_s_at  | MLLT11   | 6.29E-05 | 0.651137 | 8.21547  | 7.564333 |
| 217904_s_at  | BACE1    | 6.43E-05 | 0.60166  | 6.178223 | 5.576563 |
| 225355_at    | NEURL1B  | 6.54E-05 | 0.913686 | 6.996925 | 6.083239 |
| 208029_s_at  | LAPTM4B  | 6.65E-05 | 1.125371 | 8.014379 | 6.889008 |
| 224048_at    | USP44    | 7.06E-05 | 0.616305 | 5.642555 | 5.02625  |
| 235109_at    | ZBED3    | 7.84E-05 | 0.694566 | 7.021254 | 6.326688 |

|              |              |          |          |          |          |
|--------------|--------------|----------|----------|----------|----------|
| 235142_at    | ZBTB8A       | 7.9E-05  | 0.918937 | 7.938283 | 7.019345 |
| 226670_s_at  | PABPC1L      | 8.37E-05 | 0.589001 | 7.578466 | 6.989465 |
| 215767_at    | ZNF804A      | 8.52E-05 | 0.612531 | 6.760708 | 6.148178 |
| 223939_at    | SUCNR1       | 8.69E-05 | 0.976361 | 9.151075 | 8.174714 |
| 203817_at    | GUCY1B3      | 8.94E-05 | 0.799497 | 7.35034  | 6.550843 |
| 223095_at    | MARVELD1     | 9E-05    | 0.637274 | 7.804185 | 7.166911 |
| 209035_at    | MDK          | 9.04E-05 | 0.683746 | 6.313822 | 5.630077 |
| 1552715_a_at | RXFP1        | 9.1E-05  | 0.596115 | 5.544989 | 4.948874 |
| 232985_s_at  | DPPA4        | 9.66E-05 | 0.888974 | 6.519209 | 5.630235 |
| 228372_at    | C10orf128    | 9.85E-05 | 0.90597  | 6.556981 | 5.651011 |
| 235171_at    | LOC100505501 | 9.97E-05 | 0.851648 | 7.530851 | 6.679203 |
| 207781_s_at  | ZNF711       | 0.000104 | 0.682264 | 5.862244 | 5.179979 |
| 201539_s_at  | FHL1         | 0.000106 | 0.673251 | 6.097089 | 5.423838 |
| 235333_at    | B4GALT6      | 0.000111 | 0.842393 | 8.069688 | 7.227295 |
| 235085_at    | SGK223       | 0.000113 | 0.632749 | 6.483424 | 5.850674 |
| 222996_s_at  | CXXC5        | 0.000121 | 0.59023  | 8.717809 | 8.127579 |
| 214228_x_at  | TNFRSF4      | 0.000121 | 0.675358 | 6.126131 | 5.450773 |
| 210425_x_at  | GOLGA8B      | 0.000122 | 0.693152 | 9.367791 | 8.67464  |
| 209099_x_at  | JAG1         | 0.000124 | 0.896965 | 8.151203 | 7.254238 |
| 212364_at    | MYO1B        | 0.000127 | 0.608125 | 5.463458 | 4.855333 |
| 235287_at    | CDK6         | 0.000129 | 0.708118 | 9.149825 | 8.441707 |
| 210239_at    | IRX5         | 0.000133 | 0.772332 | 5.776091 | 5.003759 |
| 222719_s_at  | PDGFC        | 0.000136 | 0.624726 | 6.53185  | 5.907124 |
| 217963_s_at  | NGFRAP1      | 0.000143 | 1.108212 | 8.84187  | 7.733658 |
| 203795_s_at  | BCL7A        | 0.000152 | 0.629398 | 6.924486 | 6.295088 |
| 227860_at    | CPXM1        | 0.000158 | 0.902957 | 8.693391 | 7.790434 |
| 214505_s_at  | FHL1         | 0.00017  | 0.941473 | 6.611862 | 5.67039  |
| 233955_x_at  | CXXC5        | 0.000172 | 0.595752 | 9.429218 | 8.833466 |
| 222920_s_at  | TESPA1       | 0.0002   | 0.624854 | 7.454886 | 6.830031 |
| 204529_s_at  | TOX          | 0.000212 | 0.795582 | 7.457742 | 6.662159 |
| 241133_at    | TRBV27       | 0.000215 | 1.068105 | 8.596753 | 7.528648 |
| 206298_at    | ARHGAP22     | 0.000225 | 0.898223 | 5.736252 | 4.838029 |
| 214390_s_at  | BCAT1        | 0.000226 | 0.589869 | 6.195476 | 5.605607 |
| 210100_s_at  | ABCA2        | 0.000236 | 0.629759 | 6.230936 | 5.601178 |
| 216268_s_at  | JAG1         | 0.000262 | 0.911887 | 7.867904 | 6.956016 |
| 231982_at    | C19orf77     | 0.000267 | 0.938756 | 8.560813 | 7.622057 |
| 210815_s_at  | CALCRL       | 0.000273 | 0.585023 | 5.462048 | 4.877025 |
| 213415_at    | CLIC2        | 0.000298 | 0.766514 | 6.282669 | 5.516155 |
| 223565_at    | MZB1         | 0.000319 | 0.701362 | 6.236702 | 5.53534  |
| 205780_at    | BIK          | 0.000319 | 0.837719 | 6.026114 | 5.188395 |
| 210298_x_at  | FHL1         | 0.000335 | 0.815924 | 6.317342 | 5.501418 |
| 1555923_a_at | C10orf114    | 0.000343 | 0.595947 | 5.570599 | 4.974651 |
| 226282_at    | PTPN14       | 0.000367 | 0.878254 | 5.872693 | 4.994439 |
| 220798_x_at  | LPPR3        | 0.000388 | 0.648149 | 7.086067 | 6.437918 |
| 240766_at    | EPC1         | 0.000413 | 0.959315 | 7.414098 | 6.454783 |

|              |              |          |          |          |          |
|--------------|--------------|----------|----------|----------|----------|
| 208798_x_at  | GOLGA8A      | 0.000419 | 0.7433   | 9.24558  | 8.50228  |
| 236553_at    | LOC100507520 | 0.000419 | 0.594676 | 6.555712 | 5.961035 |
| 202806_at    | DBN1         | 0.000457 | 0.65793  | 6.493869 | 5.83594  |
| 204082_at    | PBX3         | 0.000466 | 0.844513 | 9.100676 | 8.256163 |
| 205479_s_at  | PLAU         | 0.000479 | 0.589109 | 6.458919 | 5.86981  |
| 222281_s_at  | LOC100505650 | 0.000531 | 0.683173 | 6.625972 | 5.9428   |
| 218086_at    | NPDC1        | 0.000547 | 0.748833 | 6.390581 | 5.641748 |
| 1565162_s_at | MGST1        | 0.000557 | 0.748353 | 9.901949 | 9.153596 |
| 228011_at    | FAM92A1      | 0.000596 | 0.622642 | 5.765276 | 5.142635 |
| 242172_at    | MEIS1        | 0.000626 | 0.732239 | 7.030773 | 6.298534 |
| 204069_at    | MEIS1        | 0.000636 | 0.943984 | 8.26407  | 7.320087 |
| 209160_at    | AKR1C3       | 0.000646 | 0.788867 | 7.671752 | 6.882885 |
| 225782_at    | MSRB3        | 0.000719 | 0.678508 | 9.425228 | 8.746721 |
| 225665_at    | ZAK          | 0.000743 | 0.637672 | 7.675723 | 7.038051 |
| 201416_at    | SOX4         | 0.000783 | 0.798647 | 8.868024 | 8.069377 |
| 213668_s_at  | SOX4         | 0.000807 | 0.930245 | 8.228082 | 7.297837 |
| 244533_at    | PTPN14       | 0.000858 | 0.619533 | 5.609589 | 4.990056 |
| 205612_at    | MMRN1        | 0.000944 | 0.673663 | 6.692272 | 6.018609 |
| 231736_x_at  | MGST1        | 0.00096  | 0.668775 | 10.40005 | 9.73127  |
| 243110_x_at  | NPW          | 0.00097  | 0.728954 | 5.388839 | 4.659885 |
| 238206_at    | RXFP1        | 0.000978 | 0.695497 | 5.530796 | 4.835299 |
| 204165_at    | WASF1        | 0.001022 | 0.726069 | 7.756582 | 7.030513 |
| 210664_s_at  | TFPI         | 0.001095 | 0.633681 | 6.857935 | 6.224254 |
| 231767_at    | HOXB4        | 0.001097 | 0.588521 | 7.149183 | 6.560663 |
| 211748_x_at  | PTGDS        | 0.001206 | 0.808763 | 6.494578 | 5.685815 |
| 224918_x_at  | MGST1        | 0.00122  | 0.644623 | 10.50847 | 9.863845 |
| 201830_s_at  | NET1         | 0.001241 | 0.609782 | 8.33044  | 7.720658 |
| 204548_at    | STAR         | 0.001258 | 0.622667 | 6.218694 | 5.596028 |
| 206574_s_at  | PTP4A3       | 0.001315 | 0.640281 | 6.423388 | 5.783107 |
| 1566764_at   | MACC1        | 0.00138  | 0.61013  | 6.097666 | 5.487536 |
| 206637_at    | P2RY14       | 0.0014   | 0.602824 | 6.296498 | 5.693674 |
| 230670_at    | IGSF10       | 0.001437 | 0.674872 | 7.523435 | 6.848563 |
| 205453_at    | HOXB2        | 0.001473 | 0.956468 | 8.360682 | 7.404214 |
| 206310_at    | SPINK2       | 0.001568 | 1.031873 | 8.8508   | 7.818927 |
| 213260_at    | FOXC1        | 0.001651 | 0.828091 | 7.052017 | 6.223926 |
| 238784_at    | DPY19L2      | 0.001745 | 0.681382 | 6.91133  | 6.229948 |
| 230158_at    | DPY19L2      | 0.001861 | 0.628032 | 6.527889 | 5.899857 |
| 221004_s_at  | ITM2C        | 0.001959 | 0.627352 | 8.879225 | 8.251873 |
| 202729_s_at  | LTBP1        | 0.001989 | 0.679165 | 7.813368 | 7.134203 |
| 226676_at    | ZNF521       | 0.002062 | 0.791881 | 6.224844 | 5.432964 |
| 209487_at    | RBPMS        | 0.002067 | 0.606994 | 5.80365  | 5.196656 |
| 213217_at    | ADCY2        | 0.002138 | 0.592401 | 6.096154 | 5.503753 |
| 201841_s_at  | HSPB1        | 0.002291 | 0.594505 | 7.938106 | 7.3436   |
| 226677_at    | ZNF521       | 0.002394 | 0.89656  | 6.301288 | 5.404728 |
| 228904_at    | HOXB3        | 0.002504 | 1.003047 | 9.229006 | 8.225959 |

|              |          |          |          |          |          |
|--------------|----------|----------|----------|----------|----------|
| 227923_at    | SHANK3   | 0.002836 | 0.769042 | 6.517461 | 5.74842  |
| 207836_s_at  | RBPMS    | 0.002965 | 0.592304 | 5.387292 | 4.794988 |
| 209488_s_at  | RBPMS    | 0.002978 | 0.701307 | 5.648666 | 4.947358 |
| 229309_at    | ADRB1    | 0.003111 | 0.638153 | 6.161417 | 5.523264 |
| 1555630_a_at | RAB34    | 0.003131 | 0.653136 | 8.582193 | 7.929057 |
| 1559477_s_at | MEIS1    | 0.003755 | 0.774195 | 7.479992 | 6.705797 |
| 1566363_at   | DNTT     | 0.004659 | 1.047745 | 7.26976  | 6.222016 |
| 219218_at    | BAHCC1   | 0.00565  | 0.604503 | 8.703588 | 8.099084 |
| 235753_at    | HOXA7    | 0.005815 | 0.657233 | 7.679461 | 7.022228 |
| 226817_at    | DSC2     | 0.006272 | 0.719843 | 7.27338  | 6.553536 |
| 228708_at    | RAB27B   | 0.006277 | 0.624367 | 8.182219 | 7.557852 |
| 213479_at    | NPTX2    | 0.007762 | 0.691524 | 5.665064 | 4.97354  |
| 206871_at    | ELANE    | 0.008172 | 1.042487 | 9.576905 | 8.534417 |
| 1553808_a_at | NKX2-3   | 0.009171 | 0.775222 | 7.138799 | 6.363578 |
| 227297_at    | ITGA9    | 0.009725 | 0.610096 | 7.040326 | 6.43023  |
| 209757_s_at  | MYCN     | 0.009905 | 0.826741 | 7.696992 | 6.870251 |
| 203305_at    | F13A1    | 0.010319 | 0.740325 | 9.006593 | 8.266267 |
| 201324_at    | EMP1     | 0.010613 | 0.622593 | 7.427675 | 6.805082 |
| 204438_at    | MRC1     | 0.012584 | 0.609934 | 6.483242 | 5.873308 |
| 213844_at    | HOXA5    | 0.013817 | 0.852044 | 8.198733 | 7.346689 |
| 207341_at    | PRTN3    | 0.015581 | 0.855576 | 8.689356 | 7.83378  |
| 206660_at    | IGLL1    | 0.027079 | 0.6797   | 8.819223 | 8.139523 |
| 235521_at    | HOXA3    | 0.027588 | 0.622885 | 7.598642 | 6.975757 |
| 221654_s_at  | USP3     | 6.31E-19 | -0.89623 | 8.537594 | 9.433819 |
| 219582_at    | OGFRL1   | 2.21E-12 | -0.88141 | 6.69283  | 7.574243 |
| 210190_at    | STX11    | 3.95E-12 | -1.60632 | 5.290153 | 6.896476 |
| 244556_at    | LCP2     | 6.63E-12 | -0.99436 | 6.007286 | 7.001651 |
| 1553133_at   | C9orf72  | 1.52E-11 | -1.23883 | 5.862473 | 7.101304 |
| 225582_at    | ITPRIP   | 3.63E-11 | -0.7273  | 6.908772 | 7.636072 |
| 213988_s_at  | SAT1     | 6.30E-11 | -1.16928 | 9.062489 | 10.23177 |
| 226026_at    | DIRC2    | 7.08E-11 | -0.73919 | 5.949866 | 6.689056 |
| 209287_s_at  | CDC42EP3 | 8.67E-11 | -0.92934 | 6.234473 | 7.163813 |
| 1552485_at   | LACTB    | 2.51E-10 | -0.69828 | 6.597957 | 7.296241 |
| 230492_s_at  | GPCPD1   | 2.53E-10 | -0.63381 | 7.365984 | 7.999796 |
| 1553134_s_at | C9orf72  | 3.17E-10 | -0.71071 | 4.956158 | 5.666867 |
| 235593_at    | ZEB2     | 4.10E-10 | -0.86928 | 8.251069 | 9.120347 |
| 241752_at    | SLC8A1   | 4.75E-10 | -0.8295  | 5.350518 | 6.180017 |
| 201926_s_at  | CD55     | 6.33E-10 | -0.66382 | 8.264291 | 8.928107 |
| 238469_at    | OGFRL1   | 6.41E-10 | -0.77867 | 6.70301  | 7.481678 |
| 215223_s_at  | SOD2     | 7.46E-10 | -1.3709  | 7.511311 | 8.882207 |
| 217741_s_at  | ZFAND5   | 8.75E-10 | -0.5907  | 10.52773 | 11.11843 |
| 225685_at    | CDC42EP3 | 9.08E-10 | -1.23064 | 7.265062 | 8.495702 |
| 202205_at    | VASP     | 9.82E-10 | -0.82225 | 8.877406 | 9.699658 |
| 212659_s_at  | IL1RN    | 1.06E-09 | -1.02478 | 5.881044 | 6.905826 |
| 221978_at    | HLA-F    | 1.09E-09 | -0.79886 | 5.904243 | 6.703104 |

|              |          |          |          |          |          |
|--------------|----------|----------|----------|----------|----------|
| 201502_s_at  | NFKBIA   | 1.47E-09 | -0.88873 | 10.71061 | 11.59934 |
| 230380_at    | THAP2    | 1.75E-09 | -0.88076 | 5.264447 | 6.145204 |
| 207574_s_at  | GADD45B  | 1.82E-09 | -1.03431 | 7.621676 | 8.655982 |
| 229439_s_at  | RBM47    | 2.13E-09 | -0.98414 | 4.61286  | 5.597004 |
| 209286_at    | CDC42EP3 | 3.34E-09 | -1.04385 | 7.031993 | 8.075845 |
| 203927_at    | NFKBIE   | 3.79E-09 | -0.74049 | 6.406853 | 7.147347 |
| 1569599_at   | SAMSN1   | 3.95E-09 | -1.31806 | 5.980768 | 7.298832 |
| 206584_at    | LY96     | 6.42E-09 | -0.91533 | 5.281492 | 6.19682  |
| 210592_s_at  | SAT1     | 6.43E-09 | -0.74963 | 10.33968 | 11.08931 |
| 202388_at    | RGS2     | 6.96E-09 | -1.31366 | 8.785281 | 10.09894 |
| 220023_at    | APOBR    | 7.38E-09 | -0.74461 | 6.680544 | 7.425159 |
| 209304_x_at  | GADD45B  | 7.82E-09 | -0.81852 | 7.141328 | 7.959849 |
| 212657_s_at  | IL1RN    | 8.52E-09 | -1.67166 | 5.837259 | 7.508917 |
| 210992_x_at  | FCGR2C   | 9.54E-09 | -1.52335 | 5.51574  | 7.039091 |
| 1555950_a_at | CD55     | 9.79E-09 | -0.63021 | 8.330255 | 8.960461 |
| 238546_at    | SLC8A1   | 1.46E-08 | -0.94304 | 4.776385 | 5.719425 |
| 1557197_a_at | LGALS3   | 1.47E-08 | -0.65521 | 4.95092  | 5.606134 |
| 205627_at    | CDA      | 1.48E-08 | -1.39277 | 5.068627 | 6.461397 |
| 217388_s_at  | KYNU     | 1.55E-08 | -1.19344 | 6.92199  | 8.115426 |
| 1552542_s_at | TAGAP    | 1.79E-08 | -0.7928  | 6.670254 | 7.463058 |
| 214467_at    | GPR65    | 1.88E-08 | -1.10152 | 6.157602 | 7.25912  |
| 211965_at    | ZFP36L1  | 1.99E-08 | -0.90835 | 5.44594  | 6.354291 |
| 227935_s_at  | PCGF5    | 2.02E-08 | -0.63159 | 7.227878 | 7.859468 |
| 226140_s_at  | OTUD1    | 2.03E-08 | -1.04128 | 7.926663 | 8.967943 |
| 204440_at    | CD83     | 2.10E-08 | -1.24882 | 7.762654 | 9.011471 |
| 222934_s_at  | CLEC4E   | 2.20E-08 | -1.22014 | 5.052891 | 6.273034 |
| 209288_s_at  | CDC42EP3 | 2.24E-08 | -1.0529  | 7.433675 | 8.486579 |
| 202877_s_at  | CD93     | 2.35E-08 | -1.25306 | 6.538736 | 7.791794 |
| 235670_at    | STX11    | 2.42E-08 | -1.18543 | 6.972295 | 8.157729 |
| 233031_at    | ZEB2     | 2.50E-08 | -0.90822 | 6.476011 | 7.384226 |
| 206130_s_at  | ASGR2    | 2.51E-08 | -1.25966 | 5.376179 | 6.635844 |
| 210754_s_at  | LYN      | 2.71E-08 | -0.59671 | 9.510818 | 10.10753 |
| 204385_at    | KYNU     | 2.83E-08 | -0.79775 | 6.246297 | 7.04405  |
| 211810_s_at  | GALC     | 3.00E-08 | -0.60075 | 6.063771 | 6.664521 |
| 231035_s_at  | OTUD1    | 3.09E-08 | -1.02103 | 5.610848 | 6.631881 |
| 219947_at    | CLEC4A   | 3.16E-08 | -1.29231 | 5.826819 | 7.119132 |
| 218611_at    | IER5     | 3.26E-08 | -0.78572 | 8.789276 | 9.575001 |
| 216841_s_at  | SOD2     | 3.34E-08 | -1.0432  | 6.824636 | 7.867832 |
| 1555214_a_at | CLEC7A   | 3.35E-08 | -1.3783  | 4.780042 | 6.158347 |
| 203300_x_at  | AP1S2    | 3.42E-08 | -0.75643 | 9.132858 | 9.889292 |
| 205205_at    | RELB     | 3.46E-08 | -0.68687 | 6.289778 | 6.976648 |
| 216243_s_at  | IL1RN    | 3.64E-08 | -1.14942 | 5.639089 | 6.788514 |
| 204062_s_at  | ULK2     | 3.68E-08 | -0.6942  | 5.576796 | 6.270994 |
| 209367_at    | STXBP2   | 3.84E-08 | -0.61011 | 8.647205 | 9.257312 |
| 234050_at    | TAGAP    | 3.95E-08 | -0.96008 | 6.052788 | 7.012866 |

|              |              |          |          |          |          |
|--------------|--------------|----------|----------|----------|----------|
| 202626_s_at  | LYN          | 3.97E-08 | -0.6171  | 9.151568 | 9.768668 |
| 1555643_s_at | LILRA5       | 4.09E-08 | -1.15432 | 5.538494 | 6.692813 |
| 1555326_a_at | ADAM9        | 4.16E-08 | -0.83881 | 5.332349 | 6.171159 |
| 203761_at    | SLA          | 4.77E-08 | -0.68725 | 8.079888 | 8.767136 |
| 218376_s_at  | MICAL1       | 4.83E-08 | -0.84701 | 8.088334 | 8.935344 |
| 205681_at    | BCL2A1       | 4.93E-08 | -1.52817 | 6.813302 | 8.341475 |
| 215990_s_at  | BCL6         | 5.45E-08 | -1.21129 | 5.782328 | 6.993618 |
| 210959_s_at  | SRD5A1       | 5.78E-08 | -0.62148 | 5.282091 | 5.903574 |
| 209305_s_at  | GADD45B      | 6.09E-08 | -0.8641  | 6.515067 | 7.379163 |
| 203455_s_at  | SAT1         | 6.34E-08 | -0.6499  | 10.35173 | 11.00162 |
| 215078_at    | SOD2         | 6.59E-08 | -1.28716 | 4.83679  | 6.123946 |
| 206934_at    | SIRPB1       | 7.38E-08 | -0.9656  | 5.408461 | 6.374064 |
| 206420_at    | IGSF6        | 7.51E-08 | -1.13829 | 6.065865 | 7.204154 |
| 205992_s_at  | IL15         | 7.55E-08 | -0.72393 | 5.153424 | 5.877352 |
| 1566342_at   | SOD2         | 7.98E-08 | -0.87885 | 6.886385 | 7.76524  |
| 210663_s_at  | KYNU         | 8.78E-08 | -1.03103 | 6.622332 | 7.653364 |
| 215838_at    | LILRA5       | 9.18E-08 | -0.97892 | 5.638196 | 6.617117 |
| 226561_at    | AGFG1        | 9.31E-08 | -0.67509 | 7.225095 | 7.90019  |
| 209636_at    | NFKB2        | 9.43E-08 | -0.6606  | 5.060872 | 5.721469 |
| 211307_s_at  | FCAR         | 1.03E-07 | -1.15229 | 4.775218 | 5.927504 |
| 200784_s_at  | LRP1         | 1.05E-07 | -0.86045 | 4.808573 | 5.669023 |
| 210538_s_at  | BIRC3        | 1.10E-07 | -0.8237  | 6.00409  | 6.827787 |
| 226810_at    | OGFRL1       | 1.12E-07 | -0.84564 | 8.380204 | 9.22584  |
| 202637_s_at  | ICAM1        | 1.21E-07 | -1.22045 | 6.80207  | 8.022516 |
| 1561615_s_at | SLC8A1       | 1.23E-07 | -0.70103 | 4.842858 | 5.543891 |
| 204790_at    | SMAD7        | 1.29E-07 | -0.85839 | 5.39045  | 6.248837 |
| 223454_at    | CXCL16       | 1.32E-07 | -0.96531 | 6.07554  | 7.040852 |
| 228745_at    | SGTB         | 1.34E-07 | -0.74376 | 6.197599 | 6.941354 |
| 232311_at    | B2M          | 1.35E-07 | -0.61975 | 6.637161 | 7.256908 |
| 221724_s_at  | CLEC4A       | 1.37E-07 | -1.09711 | 5.286589 | 6.383701 |
| 210422_x_at  | SLC11A1      | 1.38E-07 | -0.69852 | 6.666757 | 7.365279 |
| 1554624_a_at | SIRPB1       | 1.39E-07 | -1.22661 | 5.936192 | 7.162799 |
| 60084_at     | CYLD         | 1.51E-07 | -0.62808 | 5.544914 | 6.172993 |
| 1552807_a_at | SIGLEC10     | 1.68E-07 | -0.76494 | 7.149224 | 7.914162 |
| 217591_at    | SKIL         | 1.76E-07 | -0.88099 | 6.532587 | 7.413578 |
| 225142_at    | JHDM1D       | 1.77E-07 | -0.7311  | 5.526676 | 6.257775 |
| 222876_s_at  | ADAP2        | 1.80E-07 | -1.14001 | 5.298767 | 6.438779 |
| 211962_s_at  | ZFP36L1      | 1.83E-07 | -1.2531  | 7.818815 | 9.071913 |
| 36564_at     | RNF19B       | 1.89E-07 | -0.7628  | 7.49506  | 8.257861 |
| 203299_s_at  | AP1S2        | 1.92E-07 | -0.62371 | 7.150788 | 7.774498 |
| 219358_s_at  | ADAP2        | 1.97E-07 | -0.68132 | 6.242132 | 6.923448 |
| 202638_s_at  | ICAM1        | 2.03E-07 | -1.11509 | 6.281318 | 7.396413 |
| 240103_at    | LOC100996457 | 2.03E-07 | -0.91532 | 4.693468 | 5.608788 |
| 235518_at    | SLC8A1       | 2.11E-07 | -1.08239 | 5.461757 | 6.544151 |
| 210423_s_at  | SLC11A1      | 2.21E-07 | -1.25532 | 6.140434 | 7.39575  |

|              |          |          |          |          |          |
|--------------|----------|----------|----------|----------|----------|
| 218454_at    | PLBD1    | 2.23E-07 | -1.79814 | 6.792698 | 8.590841 |
| 223422_s_at  | ARHGAP24 | 2.34E-07 | -0.62086 | 5.109768 | 5.730625 |
| 203561_at    | FCGR2A   | 2.37E-07 | -1.2935  | 6.811453 | 8.104952 |
| 230264_s_at  | AP1S2    | 2.52E-07 | -0.71064 | 9.37659  | 10.08723 |
| 201489_at    | PPIF     | 2.56E-07 | -0.6511  | 8.789337 | 9.440437 |
| 222496_s_at  | RBM47    | 2.59E-07 | -1.23378 | 6.389368 | 7.623144 |
| 207535_s_at  | NFKB2    | 2.71E-07 | -0.82595 | 7.171304 | 7.997256 |
| 202901_x_at  | CTSS     | 2.73E-07 | -0.88556 | 9.014888 | 9.900452 |
| 1554406_a_at | CLEC7A   | 2.85E-07 | -1.04416 | 6.420867 | 7.465031 |
| 222218_s_at  | PILRA    | 2.97E-07 | -1.00981 | 7.583347 | 8.593154 |
| 204897_at    | PTGER4   | 3.03E-07 | -0.74143 | 9.605343 | 10.34678 |
| 227266_s_at  | FYB      | 3.04E-07 | -0.67104 | 8.640225 | 9.31127  |
| 227791_at    | SLC9A9   | 3.06E-07 | -0.73306 | 5.645476 | 6.378535 |
| 1557257_at   | BCL10    | 3.08E-07 | -0.61652 | 6.620867 | 7.237382 |
| 228176_at    | S1PR3    | 3.13E-07 | -0.85786 | 5.344698 | 6.202563 |
| 1554309_at   | EIF4G3   | 3.15E-07 | -0.62414 | 5.776866 | 6.401002 |
| 211395_x_at  | FCGR2C   | 3.26E-07 | -1.12008 | 6.887099 | 8.007182 |
| 204487_s_at  | KCNQ1    | 3.50E-07 | -0.94867 | 5.37464  | 6.323314 |
| 207674_at    | FCAR     | 3.60E-07 | -1.26762 | 5.717775 | 6.985394 |
| 209824_s_at  | ARNTL    | 3.76E-07 | -0.75484 | 5.709137 | 6.463972 |
| 220005_at    | P2RY13   | 3.86E-07 | -1.20047 | 5.919253 | 7.119718 |
| 204675_at    | SRD5A1   | 4.26E-07 | -0.65719 | 5.839724 | 6.496917 |
| 225059_at    | AGTRAP   | 4.40E-07 | -0.77299 | 7.721104 | 8.494095 |
| 219593_at    | SLC15A3  | 4.45E-07 | -1.39268 | 5.738743 | 7.131418 |
| 202625_at    | LYN      | 4.59E-07 | -0.59885 | 9.371046 | 9.969898 |
| 204907_s_at  | BCL3     | 4.75E-07 | -0.68279 | 5.733212 | 6.415998 |
| 1555167_s_at | NAMPT    | 4.77E-07 | -1.39766 | 6.262248 | 7.659907 |
| 239704_at    | RNF144B  | 4.85E-07 | -1.03283 | 4.507283 | 5.540118 |
| 204393_s_at  | ACPP     | 4.87E-07 | -0.85553 | 5.562592 | 6.418122 |
| 211732_x_at  | HNMT     | 4.88E-07 | -0.95366 | 4.859064 | 5.812722 |
| 213038_at    | RNF19B   | 5.27E-07 | -0.67434 | 7.394295 | 8.068634 |
| 205686_s_at  | CD86     | 5.35E-07 | -0.9523  | 5.528831 | 6.48113  |
| 202912_at    | ADM      | 5.37E-07 | -1.12652 | 5.479787 | 6.606303 |
| 206244_at    | CR1      | 5.43E-07 | -1.03503 | 5.229302 | 6.264328 |
| 211816_x_at  | FCAR     | 5.47E-07 | -1.02428 | 5.515862 | 6.540139 |
| 202902_s_at  | CTSS     | 5.50E-07 | -0.97936 | 9.753022 | 10.73238 |
| 231990_at    | USP15    | 5.52E-07 | -0.68416 | 7.295686 | 7.979845 |
| 204122_at    | TYROBP   | 5.56E-07 | -0.80669 | 9.539269 | 10.34596 |
| 217911_s_at  | BAG3     | 5.67E-07 | -0.76272 | 5.518497 | 6.281222 |
| 212423_at    | ZCCHC24  | 5.68E-07 | -0.80905 | 5.220955 | 6.030001 |
| 215485_s_at  | ICAM1    | 5.68E-07 | -0.75752 | 5.84653  | 6.604046 |
| 205660_at    | OASL     | 5.86E-07 | -0.69363 | 5.641484 | 6.335114 |
| 213624_at    | SMPDL3A  | 5.93E-07 | -1.08063 | 5.219962 | 6.300593 |
| 205027_s_at  | MAP3K8   | 6.07E-07 | -0.80121 | 6.69513  | 7.496342 |
| 221477_s_at  | SOD2     | 6.17E-07 | -0.82875 | 8.543492 | 9.372242 |



|              |          |          |          |          |          |
|--------------|----------|----------|----------|----------|----------|
| 205863_at    | S100A12  | 6.30E-07 | -1.72351 | 6.571822 | 8.295334 |
| 1568957_x_at | SRGAP2C  | 6.35E-07 | -0.59098 | 5.819351 | 6.410332 |
| 211799_x_at  | HLA-C    | 6.58E-07 | -0.69968 | 10.11576 | 10.81544 |
| 228555_at    | CAMK2D   | 6.66E-07 | -0.70104 | 5.254539 | 5.955574 |
| 205859_at    | LY86     | 6.78E-07 | -1.09412 | 7.89071  | 8.984832 |
| 204118_at    | CD48     | 6.83E-07 | -1.00402 | 7.445389 | 8.449409 |
| 223169_s_at  | RHOU     | 6.86E-07 | -0.84729 | 5.359212 | 6.206502 |
| 209545_s_at  | RIPK2    | 6.87E-07 | -0.62365 | 8.44219  | 9.065837 |
| 201531_at    | ZFP36    | 7.10E-07 | -1.02413 | 9.884471 | 10.90861 |
| 208092_s_at  | FAM49A   | 7.34E-07 | -0.71494 | 6.50101  | 7.215948 |
| 202643_s_at  | TNFAIP3  | 7.34E-07 | -1.09321 | 8.832143 | 9.925351 |
| 204392_at    | CAMK1    | 7.75E-07 | -0.83778 | 5.460887 | 6.298665 |
| 232617_at    | CTSS     | 7.92E-07 | -0.88163 | 9.693856 | 10.57549 |
| 242903_at    | IFNGR1   | 8.33E-07 | -0.69972 | 7.777261 | 8.476984 |
| 202878_s_at  | CD93     | 8.64E-07 | -1.29578 | 7.821219 | 9.116999 |
| 221210_s_at  | NPL      | 8.75E-07 | -0.9538  | 5.749141 | 6.702937 |
| 213607_x_at  | NADK     | 8.92E-07 | -0.6174  | 7.003665 | 7.621063 |
| 204232_at    | FCER1G   | 9.70E-07 | -1.11908 | 9.420812 | 10.53989 |
| 218033_s_at  | SNN      | 9.89E-07 | -0.59355 | 5.15276  | 5.74631  |
| 203760_s_at  | SLA      | 1.09E-06 | -0.7675  | 8.133793 | 8.901297 |
| 213006_at    | CEBPD    | 1.09E-06 | -0.97087 | 5.503979 | 6.474848 |
| 211795_s_at  | FYB      | 1.09E-06 | -0.64612 | 8.539778 | 9.185897 |
| 219788_at    | PILRA    | 1.15E-06 | -1.07818 | 6.109465 | 7.187644 |
| 35626_at     | SGSH     | 1.17E-06 | -0.87933 | 6.257375 | 7.136707 |
| 222670_s_at  | MAFB     | 1.19E-06 | -1.532   | 7.523676 | 9.055673 |
| 221541_at    | CRISPLD2 | 1.21E-06 | -1.13365 | 6.288722 | 7.422373 |
| 200866_s_at  | PSAP     | 1.21E-06 | -0.77713 | 10.17251 | 10.94964 |
| 228486_at    | SLC44A1  | 1.26E-06 | -1.0614  | 5.953511 | 7.014908 |
| 200785_s_at  | LRP1     | 1.31E-06 | -0.69627 | 6.018892 | 6.715164 |
| 205568_at    | AQP9     | 1.34E-06 | -1.41653 | 5.953108 | 7.369639 |
| 207167_at    | CD101    | 1.44E-06 | -0.71379 | 5.493331 | 6.207121 |
| 211776_s_at  | EPB41L3  | 1.45E-06 | -1.02655 | 5.309051 | 6.335604 |
| 218793_s_at  | SCML1    | 1.45E-06 | -0.7122  | 4.744101 | 5.456305 |
| 202426_s_at  | RXRA     | 1.54E-06 | -0.65458 | 6.495135 | 7.149716 |
| 223019_at    | FAM129B  | 1.56E-06 | -0.76939 | 4.865918 | 5.635303 |
| 203922_s_at  | CYBB     | 1.59E-06 | -1.27376 | 6.955118 | 8.228877 |
| 217739_s_at  | NAMPT    | 1.64E-06 | -1.10399 | 8.860179 | 9.964167 |
| 225227_at    | SKIL     | 1.67E-06 | -0.66488 | 6.119882 | 6.784759 |
| 214211_at    | FTH1     | 1.76E-06 | -0.76853 | 9.031375 | 9.799907 |
| 244235_at    | IVNS1ABP | 1.80E-06 | -0.64871 | 5.387436 | 6.03615  |
| 222142_at    | CYLD     | 1.82E-06 | -0.64107 | 5.108528 | 5.749596 |
| 211794_at    | FYB      | 1.82E-06 | -0.86    | 6.377998 | 7.237993 |
| 221561_at    | SOAT1    | 1.84E-06 | -0.62281 | 7.095955 | 7.718763 |
| 223217_s_at  | NFKBIZ   | 1.93E-06 | -0.84863 | 10.08626 | 10.93489 |
| 204735_at    | PDE4A    | 2.04E-06 | -0.70484 | 5.428903 | 6.133747 |

|              |         |          |          |          |          |
|--------------|---------|----------|----------|----------|----------|
| 202644_s_at  | TNFAIP3 | 2.04E-06 | -0.91687 | 9.568376 | 10.48525 |
| 223767_at    | GPR84   | 2.05E-06 | -0.78246 | 4.939716 | 5.722177 |
| 205789_at    | CD1D    | 2.18E-06 | -1.37717 | 6.136262 | 7.513427 |
| 211530_x_at  | HLA-G   | 2.19E-06 | -0.65556 | 10.45635 | 11.11191 |
| 230550_at    | MS4A6A  | 2.20E-06 | -1.19825 | 6.19698  | 7.395231 |
| 207270_x_at  | CD300C  | 2.30E-06 | -0.67726 | 6.682798 | 7.360056 |
| 1552554_a_at | NLRC4   | 2.42E-06 | -0.59883 | 4.875896 | 5.474723 |
| 214696_at    | MIR22HG | 2.46E-06 | -0.72262 | 7.386122 | 8.108738 |
| 207691_x_at  | ENTPD1  | 2.50E-06 | -0.73187 | 6.216012 | 6.947883 |
| 201739_at    | SGK1    | 2.52E-06 | -1.11567 | 7.965596 | 9.081264 |
| 235549_at    | RNF144B | 2.76E-06 | -0.62725 | 4.845492 | 5.472746 |
| 1555756_a_at | CLEC7A  | 2.77E-06 | -1.49819 | 6.621652 | 8.119839 |
| 209473_at    | ENTPD1  | 2.78E-06 | -0.78294 | 6.452011 | 7.234955 |
| 202437_s_at  | CYP1B1  | 2.82E-06 | -1.27709 | 5.50877  | 6.785856 |
| 205118_at    | FPR1    | 2.86E-06 | -0.97083 | 5.084514 | 6.05534  |
| 203645_s_at  | CD163   | 2.87E-06 | -1.46303 | 5.936739 | 7.399773 |
| 1552504_a_at | BRSK1   | 2.92E-06 | -0.85725 | 5.232927 | 6.090181 |
| 204417_at    | GALC    | 2.95E-06 | -0.71612 | 7.478105 | 8.19423  |
| 205639_at    | AOAH    | 3.00E-06 | -0.71195 | 7.314118 | 8.026063 |
| 206765_at    | KCNJ2   | 3.13E-06 | -0.91891 | 5.409905 | 6.328814 |
| 213524_s_at  | G0S2    | 3.17E-06 | -1.25669 | 6.724795 | 7.981487 |
| 223314_at    | TSPAN14 | 3.18E-06 | -0.61825 | 6.249812 | 6.868066 |
| 1552701_a_at | CARD16  | 3.37E-06 | -0.80012 | 7.492271 | 8.292389 |
| 201743_at    | CD14    | 3.40E-06 | -1.93318 | 6.774038 | 8.707219 |
| 230499_at    | BIRC3   | 3.55E-06 | -0.6421  | 6.265827 | 6.90793  |
| 206710_s_at  | EPB41L3 | 3.60E-06 | -1.27345 | 5.149443 | 6.422895 |
| 210176_at    | TLR1    | 3.63E-06 | -0.66065 | 6.326044 | 6.986691 |
| 204588_s_at  | SLC7A7  | 3.89E-06 | -1.26021 | 7.157143 | 8.417352 |
| 219694_at    | FAM105A | 3.97E-06 | -0.82006 | 5.414494 | 6.234551 |
| 209474_s_at  | ENTPD1  | 4.26E-06 | -0.8221  | 5.605993 | 6.428098 |
| 238987_at    | B4GALT1 | 4.28E-06 | -0.61551 | 7.070318 | 7.685828 |
| 223405_at    | NPL     | 4.29E-06 | -0.92799 | 6.397174 | 7.325159 |
| 204860_s_at  | NAIP    | 4.32E-06 | -0.72969 | 7.92203  | 8.651716 |
| 212831_at    | MEGF9   | 4.41E-06 | -0.76736 | 6.416314 | 7.183678 |
| 203140_at    | BCL6    | 4.44E-06 | -1.10355 | 8.047676 | 9.151225 |
| 1552772_at   | CLEC4D  | 4.52E-06 | -0.74695 | 4.848238 | 5.595184 |
| 228153_at    | RNF144B | 4.65E-06 | -0.77889 | 7.392459 | 8.171347 |
| 225019_at    | CAMK2D  | 4.66E-06 | -0.76272 | 5.456191 | 6.218911 |
| 205922_at    | VNN2    | 4.71E-06 | -1.20984 | 5.777878 | 6.987721 |
| 213002_at    | MARCKS  | 4.91E-06 | -0.78651 | 6.150059 | 6.936573 |
| 230559_x_at  | FGD4    | 5.06E-06 | -0.6349  | 5.121403 | 5.756307 |
| 201473_at    | JUNB    | 5.12E-06 | -0.78651 | 9.514403 | 10.30091 |
| 1554899_s_at | FCER1G  | 5.16E-06 | -1.25924 | 8.656191 | 9.915431 |
| 202381_at    | ADAM9   | 5.34E-06 | -0.77325 | 6.750733 | 7.523979 |
| 219872_at    | FAM198B | 5.35E-06 | -0.99849 | 5.474299 | 6.472785 |

|              |          |          |          |          |          |
|--------------|----------|----------|----------|----------|----------|
| 208018_s_at  | HCK      | 5.41E-06 | -0.97409 | 8.44515  | 9.419235 |
| 218559_s_at  | MAFB     | 5.51E-06 | -1.71557 | 7.038153 | 8.753719 |
| 235019_at    | CPM      | 5.53E-06 | -0.65001 | 5.187274 | 5.83728  |
| 201670_s_at  | MARCKS   | 5.60E-06 | -1.22683 | 6.542208 | 7.76904  |
| 205237_at    | FCN1     | 5.72E-06 | -1.6105  | 8.048907 | 9.659403 |
| 1555736_a_at | AGTRAP   | 5.79E-06 | -0.81039 | 8.060549 | 8.870938 |
| 203234_at    | UPP1     | 5.80E-06 | -0.9252  | 6.052394 | 6.977593 |
| 37028_at     | PPP1R15A | 5.81E-06 | -0.69684 | 9.343239 | 10.04008 |
| 225251_at    | RAB24    | 5.83E-06 | -0.60036 | 7.682737 | 8.283094 |
| 209803_s_at  | PHLDA2   | 5.89E-06 | -0.95638 | 5.128848 | 6.085232 |
| 217192_s_at  | PRDM1    | 5.93E-06 | -0.70816 | 5.214219 | 5.922379 |
| 1552773_at   | CLEC4D   | 6.02E-06 | -0.6577  | 5.169469 | 5.827166 |
| 217738_at    | NAMPT    | 6.05E-06 | -0.8733  | 7.952211 | 8.825511 |
| 212681_at    | EPB41L3  | 6.11E-06 | -1.22608 | 5.032693 | 6.258768 |
| 211676_s_at  | IFNGR1   | 6.18E-06 | -0.62224 | 8.466923 | 9.089158 |
| 211100_x_at  | LILRA2   | 6.35E-06 | -0.80763 | 7.633975 | 8.4416   |
| 204908_s_at  | BCL3     | 6.42E-06 | -0.71073 | 7.324265 | 8.034994 |
| 242445_at    | FGD4     | 6.42E-06 | -0.59984 | 5.47361  | 6.073446 |
| 215049_x_at  | CD163    | 6.54E-06 | -1.40634 | 5.798242 | 7.20458  |
| 228758_at    | BCL6     | 6.55E-06 | -0.95062 | 5.811113 | 6.761733 |
| 209606_at    | CYTIP    | 7.11E-06 | -0.70519 | 8.314164 | 9.01935  |
| 227131_at    | MAP3K3   | 7.27E-06 | -0.59888 | 6.499936 | 7.098814 |
| 221755_at    | EHBP1L1  | 7.41E-06 | -0.6533  | 7.028912 | 7.682216 |
| 1555638_a_at | SAMSN1   | 7.78E-06 | -0.613   | 7.741011 | 8.354013 |
| 200998_s_at  | CKAP4    | 7.81E-06 | -0.71863 | 7.310629 | 8.029263 |
| 221578_at    | RASSF4   | 7.83E-06 | -0.85552 | 5.111782 | 5.967306 |
| 235568_at    | C19orf59 | 7.83E-06 | -0.94849 | 6.441482 | 7.38997  |
| 217507_at    | SLC11A1  | 7.85E-06 | -0.71582 | 5.014969 | 5.730785 |
| 207872_s_at  | LILRA1   | 7.98E-06 | -0.67044 | 5.988797 | 6.659238 |
| 201565_s_at  | ID2      | 8.33E-06 | -0.83673 | 9.187253 | 10.02398 |
| 224790_at    | ASAP1    | 8.38E-06 | -0.64404 | 6.854618 | 7.498654 |
| 1561880_a_at | SIGLEC16 | 8.76E-06 | -0.68941 | 4.602686 | 5.292097 |
| 223423_at    | GPR160   | 9.03E-06 | -0.6199  | 7.211281 | 7.831176 |
| 1554676_at   | SRGN     | 9.15E-06 | -0.79835 | 8.679086 | 9.477435 |
| 214370_at    | S100A8   | 9.25E-06 | -0.93118 | 5.405071 | 6.336248 |
| 205786_s_at  | ITGAM    | 9.37E-06 | -0.95616 | 8.492231 | 9.448392 |
| 228485_s_at  | SLC44A1  | 9.37E-06 | -0.7082  | 6.225665 | 6.933862 |
| 208949_s_at  | LGALS3   | 9.41E-06 | -1.16991 | 7.887706 | 9.057614 |
| 225316_at    | MFSD2A   | 9.55E-06 | -0.67742 | 4.800489 | 5.477908 |
| 211102_s_at  | LILRA2   | 9.69E-06 | -0.97124 | 5.77578  | 6.747015 |
| 230748_at    | SLC16A6  | 9.83E-06 | -0.69904 | 5.244907 | 5.943944 |
| 229510_at    | MS4A14   | 9.94E-06 | -0.80156 | 5.691653 | 6.493213 |
| 202464_s_at  | PFKFB3   | 1E-05    | -0.8538  | 7.552453 | 8.406251 |
| 203045_at    | NINJ1    | 1.01E-05 | -1.00743 | 6.735748 | 7.743174 |
| 223944_at    | NLRP12   | 1.01E-05 | -0.81483 | 6.18364  | 6.998468 |

|              |           |          |          |          |          |
|--------------|-----------|----------|----------|----------|----------|
| 229770_at    | GLT1D1    | 1.03E-05 | -0.81803 | 4.899157 | 5.717183 |
| 209696_at    | FBP1      | 1.04E-05 | -1.04095 | 6.418708 | 7.459655 |
| 201631_s_at  | IER3      | 1.08E-05 | -1.25216 | 6.909173 | 8.161328 |
| 214590_s_at  | UBE2D1    | 1.08E-05 | -0.76344 | 6.51504  | 7.278481 |
| 203665_at    | HMOX1     | 1.1E-05  | -1.00137 | 6.369972 | 7.371347 |
| 211135_x_at  | LILRB3    | 1.13E-05 | -0.98897 | 6.961851 | 7.950818 |
| 201668_x_at  | MARCKS    | 1.17E-05 | -1.05663 | 5.387709 | 6.444338 |
| 229040_at    | ITGB2-AS1 | 1.24E-05 | -0.7421  | 6.062918 | 6.805017 |
| 206025_s_at  | TNFAIP6   | 1.25E-05 | -0.70599 | 5.258574 | 5.964561 |
| 209037_s_at  | EHD1      | 1.31E-05 | -0.62927 | 6.610432 | 7.239699 |
| 202436_s_at  | CYP1B1    | 1.33E-05 | -0.99245 | 5.92067  | 6.913118 |
| 210660_at    | LILRA1    | 1.36E-05 | -0.94603 | 6.474672 | 7.420703 |
| 207224_s_at  | SIGLEC7   | 1.41E-05 | -0.71717 | 6.002544 | 6.719717 |
| 202295_s_at  | CTSH      | 1.42E-05 | -1.24458 | 7.617637 | 8.862216 |
| 203932_at    | HLA-DMB   | 1.44E-05 | -0.7561  | 7.913442 | 8.669537 |
| 1568955_at   | SRGAP2C   | 1.46E-05 | -0.7362  | 6.400619 | 7.136817 |
| 213418_at    | HSPA6     | 1.56E-05 | -0.93327 | 5.876852 | 6.810122 |
| 210225_x_at  | LILRB3    | 1.57E-05 | -0.97386 | 7.041154 | 8.015017 |
| 204619_s_at  | VCAN      | 1.58E-05 | -1.60606 | 7.380619 | 8.986681 |
| 213537_at    | HLA-DPA1  | 1.6E-05  | -1.08272 | 6.908847 | 7.991571 |
| 220832_at    | TLR8      | 1.61E-05 | -1.11198 | 5.484286 | 6.596265 |
| 1560058_at   | LOC399900 | 1.64E-05 | -0.77205 | 5.80285  | 6.574901 |
| 201642_at    | IFNGR2    | 1.66E-05 | -0.6273  | 9.16784  | 9.795135 |
| 204614_at    | SERPINB2  | 1.66E-05 | -1.4332  | 6.143553 | 7.576754 |
| 232829_at    | OR52K3P   | 1.66E-05 | -0.59225 | 5.022545 | 5.614795 |
| 213475_s_at  | ITGAL     | 1.66E-05 | -0.62822 | 8.206249 | 8.834466 |
| 203186_s_at  | S100A4    | 1.7E-05  | -0.78131 | 10.07921 | 10.86052 |
| 205685_at    | CD86      | 1.7E-05  | -0.74935 | 6.118499 | 6.867844 |
| 210152_at    | LILRB4    | 1.74E-05 | -0.65166 | 6.219214 | 6.870871 |
| 1552553_a_at | NLRC4     | 1.75E-05 | -0.73559 | 5.606278 | 6.341866 |
| 221698_s_at  | CLEC7A    | 1.82E-05 | -1.2864  | 6.786298 | 8.072696 |
| 207104_x_at  | LILRB1    | 1.85E-05 | -1.11277 | 5.820211 | 6.93298  |
| 203771_s_at  | BLVRA     | 1.85E-05 | -0.61501 | 4.792355 | 5.407365 |
| 206026_s_at  | TNFAIP6   | 1.94E-05 | -0.6511  | 5.137546 | 5.78865  |
| 202895_s_at  | SIRPA     | 1.96E-05 | -0.63558 | 5.751351 | 6.386926 |
| 229584_at    | LRRK2     | 1.97E-05 | -0.91419 | 5.703375 | 6.617567 |
| 224583_at    | COTL1     | 1.97E-05 | -0.87022 | 9.091989 | 9.96221  |
| 210184_at    | ITGAX     | 1.98E-05 | -0.68311 | 6.727046 | 7.410157 |
| 200871_s_at  | PSAP      | 2E-05    | -0.66182 | 10.76903 | 11.43086 |
| 220330_s_at  | SAMSN1    | 2.1E-05  | -0.61139 | 8.617966 | 9.229354 |
| 201566_x_at  | ID2       | 2.11E-05 | -0.80541 | 7.135174 | 7.940581 |
| 1568768_s_at | BRE-AS1   | 2.14E-05 | -0.84584 | 5.654567 | 6.500409 |
| 212956_at    | TBC1D9    | 2.18E-05 | -0.90083 | 5.722473 | 6.6233   |
| 204081_at    | NRGN      | 2.21E-05 | -1.06566 | 7.101539 | 8.167199 |
| 202435_s_at  | CYP1B1    | 2.24E-05 | -0.81003 | 5.593685 | 6.403717 |

|              |          |          |          |          |          |
|--------------|----------|----------|----------|----------|----------|
| 214511_x_at  | FCGR1B   | 2.32E-05 | -1.01988 | 7.136377 | 8.156262 |
| 214770_at    | MSR1     | 2.4E-05  | -0.78133 | 4.714736 | 5.496067 |
| 224130_s_at  | SRA1     | 2.41E-05 | -0.65997 | 5.948357 | 6.608332 |
| 205076_s_at  | MTMR11   | 2.42E-05 | -0.80539 | 5.647682 | 6.453074 |
| 203271_s_at  | UNC119   | 2.43E-05 | -0.68912 | 5.53657  | 6.225685 |
| 210773_s_at  | FPR2     | 2.43E-05 | -0.81826 | 5.307442 | 6.125706 |
| 210895_s_at  | CD86     | 2.5E-05  | -1.06499 | 6.57453  | 7.639518 |
| 206488_s_at  | CD36     | 2.5E-05  | -1.08108 | 8.298137 | 9.379218 |
| 235385_at    | 1-Mar    | 2.61E-05 | -0.99471 | 5.873891 | 6.868599 |
| 228585_at    | ENTPD1   | 2.66E-05 | -0.75555 | 5.263351 | 6.0189   |
| 211429_s_at  | SERPINA1 | 2.7E-05  | -1.2975  | 8.778287 | 10.07579 |
| 223280_x_at  | MS4A6A   | 2.76E-05 | -1.23947 | 7.901938 | 9.141405 |
| 223922_x_at  | MS4A6A   | 2.76E-05 | -0.95441 | 7.970818 | 8.925228 |
| 203923_s_at  | CYBB     | 2.78E-05 | -1.16095 | 8.03604  | 9.196993 |
| 228325_at    | KIAA0146 | 2.79E-05 | -0.95192 | 6.165973 | 7.117897 |
| 211571_s_at  | VCAN     | 2.88E-05 | -1.73194 | 7.764091 | 9.496026 |
| 1554952_s_at | NLRP12   | 2.89E-05 | -0.72165 | 5.60335  | 6.325001 |
| 210873_x_at  | APOBEC3A | 2.89E-05 | -1.19904 | 6.613033 | 7.812076 |
| 202201_at    | BLVRB    | 2.93E-05 | -0.78697 | 7.620924 | 8.40789  |
| 204912_at    | IL10RA   | 2.94E-05 | -0.98267 | 7.817007 | 8.79968  |
| 230413_s_at  | AP1S2    | 2.98E-05 | -0.61298 | 7.370443 | 7.983427 |
| 216016_at    | NLRP3    | 2.99E-05 | -0.81562 | 4.613967 | 5.429584 |
| 221718_s_at  | AKAP13   | 3E-05    | -0.63343 | 7.883935 | 8.517365 |
| 227948_at    | FGD4     | 3.02E-05 | -0.79245 | 6.332788 | 7.125236 |
| 229067_at    | SRGAP2C  | 3.21E-05 | -0.70729 | 8.225042 | 8.93233  |
| 223218_s_at  | NFKBIZ   | 3.22E-05 | -0.6261  | 10.71832 | 11.34442 |
| 204182_s_at  | ZBTB43   | 3.29E-05 | -0.88338 | 5.895731 | 6.779108 |
| 1552501_a_at | GPBAR1   | 3.44E-05 | -0.8026  | 5.269783 | 6.072382 |
| 211336_x_at  | LILRB1   | 3.45E-05 | -1.06219 | 6.218742 | 7.280934 |
| 212501_at    | CEBPB    | 3.47E-05 | -0.74643 | 10.20887 | 10.9553  |
| 211764_s_at  | UBE2D1   | 3.53E-05 | -0.61577 | 7.950042 | 8.56581  |
| 201669_s_at  | MARCKS   | 3.57E-05 | -1.2641  | 7.537512 | 8.801607 |
| 205936_s_at  | HK3      | 3.61E-05 | -1.41319 | 6.714821 | 8.128006 |
| 219403_s_at  | HPSE     | 3.63E-05 | -0.77618 | 5.218862 | 5.995044 |
| 1554999_at   | RASGEF1B | 3.69E-05 | -0.7681  | 5.525195 | 6.293298 |
| 211824_x_at  | NLRP1    | 3.76E-05 | -0.67718 | 5.133579 | 5.810758 |
| 200782_at    | ANXA5    | 3.97E-05 | -1.27752 | 7.523022 | 8.800546 |
| 203060_s_at  | PAPSS2   | 3.97E-05 | -0.70326 | 5.388082 | 6.09134  |
| 1559034_at   | SIRPB2   | 4.03E-05 | -0.74936 | 6.953108 | 7.702464 |
| 207697_x_at  | LILRB2   | 4.12E-05 | -1.24701 | 6.49389  | 7.740903 |
| 202609_at    | EPS8     | 4.26E-05 | -0.73171 | 5.504756 | 6.236463 |
| 218035_s_at  | RBM47    | 4.27E-05 | -0.978   | 6.472486 | 7.450484 |
| 210785_s_at  | THEMIS2  | 4.34E-05 | -0.70153 | 8.580823 | 9.282349 |
| 244313_at    | CR1      | 4.37E-05 | -1.05377 | 6.308585 | 7.362352 |
| 235086_at    | THBS1    | 4.52E-05 | -0.80728 | 4.847723 | 5.655    |

|              |           |          |          |          |          |
|--------------|-----------|----------|----------|----------|----------|
| 222068_s_at  | DNAAF1    | 4.61E-05 | -0.64657 | 4.707505 | 5.354079 |
| 1556034_s_at | MTMR11    | 4.68E-05 | -0.77743 | 4.962174 | 5.739605 |
| 202014_at    | PPP1R15A  | 5.16E-05 | -0.75645 | 8.776421 | 9.532874 |
| 1555728_a_at | MS4A4A    | 5.18E-05 | -0.84995 | 5.902657 | 6.75261  |
| 227276_at    | PLXDC2    | 5.27E-05 | -0.59451 | 6.60407  | 7.198575 |
| 205119_s_at  | FPR1      | 5.32E-05 | -1.43279 | 7.190914 | 8.623701 |
| 209823_x_at  | HLA-DQB1  | 5.33E-05 | -1.06671 | 6.674233 | 7.740947 |
| 229221_at    | CD44      | 5.41E-05 | -0.67934 | 6.643912 | 7.323249 |
| 206756_at    | CHST7     | 5.43E-05 | -0.64526 | 4.812922 | 5.458178 |
| 209555_s_at  | CD36      | 5.44E-05 | -1.12224 | 8.406145 | 9.528385 |
| 243296_at    | NAMPT     | 5.67E-05 | -0.93135 | 9.766472 | 10.69782 |
| 208450_at    | LGALS2    | 5.74E-05 | -1.18378 | 5.385094 | 6.568872 |
| 225800_at    | JAZF1     | 5.92E-05 | -0.89916 | 6.2822   | 7.181363 |
| 205067_at    | IL1B      | 6.03E-05 | -0.99962 | 8.274988 | 9.274611 |
| 205207_at    | IL6       | 6.2E-05  | -0.9173  | 5.050341 | 5.967639 |
| 206513_at    | AIM2      | 6.24E-05 | -0.63766 | 5.619592 | 6.257251 |
| 219607_s_at  | MS4A4A    | 6.42E-05 | -0.9232  | 5.748297 | 6.671497 |
| 204863_s_at  | IL6ST     | 6.48E-05 | -0.60412 | 5.822549 | 6.426669 |
| 206157_at    | PTX3      | 6.53E-05 | -1.07597 | 6.619685 | 7.695656 |
| 211656_x_at  | HLA-DQB1  | 6.74E-05 | -0.8735  | 7.445865 | 8.319362 |
| 205099_s_at  | CCR1      | 6.85E-05 | -0.87405 | 6.847398 | 7.721446 |
| 219434_at    | TREM1     | 6.87E-05 | -1.02741 | 6.776773 | 7.804182 |
| 207571_x_at  | THEMIS2   | 6.98E-05 | -0.66294 | 8.331275 | 8.99421  |
| 233888_s_at  | SRGAP1    | 7E-05    | -0.66097 | 4.673486 | 5.334456 |
| 1554240_a_at | ITGAL     | 7.16E-05 | -0.60553 | 8.987177 | 9.592707 |
| 204834_at    | FGL2      | 7.35E-05 | -1.23308 | 7.736882 | 8.96996  |
| 206881_s_at  | LILRA3    | 7.39E-05 | -0.89011 | 4.775068 | 5.665178 |
| 210279_at    | GPR18     | 7.43E-05 | -0.60417 | 5.582684 | 6.186857 |
| 219574_at    | 1-Mar     | 7.5E-05  | -0.86893 | 6.057594 | 6.92652  |
| 243099_at    | NFAM1     | 7.66E-05 | -0.59795 | 6.499223 | 7.097171 |
| 203535_at    | S100A9    | 7.77E-05 | -1.67394 | 8.240565 | 9.914501 |
| 207237_at    | KCNA3     | 7.78E-05 | -0.64952 | 5.062312 | 5.711828 |
| 210904_s_at  | IL13RA1   | 7.88E-05 | -0.74699 | 6.187644 | 6.934634 |
| 206707_x_at  | FAM65B    | 8.01E-05 | -0.68535 | 8.156201 | 8.841551 |
| 217552_x_at  | CR1       | 8.06E-05 | -0.95561 | 5.897562 | 6.853175 |
| 39402_at     | IL1B      | 8.14E-05 | -0.97875 | 8.275233 | 9.253985 |
| 218950_at    | ARAP3     | 8.18E-05 | -0.62281 | 5.651049 | 6.273855 |
| 217362_x_at  | HLA-DRB6  | 8.46E-05 | -0.6408  | 7.612149 | 8.252953 |
| 215646_s_at  | VCAN      | 8.64E-05 | -1.70619 | 8.035602 | 9.741787 |
| 218217_at    | SCPEP1    | 8.67E-05 | -0.90891 | 7.943945 | 8.852856 |
| 224301_x_at  | H2AFJ     | 9.17E-05 | -0.73684 | 6.426209 | 7.163051 |
| 221345_at    | FFAR2     | 9.49E-05 | -0.70064 | 4.694839 | 5.395481 |
| 229041_s_at  | ITGB2-AS1 | 9.5E-05  | -0.80088 | 7.471026 | 8.271904 |
| 201850_at    | CAPG      | 9.63E-05 | -0.6686  | 8.253319 | 8.921919 |
| 207857_at    | LILRA2    | 9.74E-05 | -0.84022 | 7.651154 | 8.491374 |

|             |              |          |          |          |          |
|-------------|--------------|----------|----------|----------|----------|
| 207091_at   | P2RX7        | 0.000104 | -0.59379 | 5.198278 | 5.792065 |
| 208748_s_at | FLOT1        | 0.000105 | -0.58914 | 4.951035 | 5.540174 |
| 220088_at   | C5AR1        | 0.000106 | -1.34484 | 7.154855 | 8.499696 |
| 208488_s_at | CR1          | 0.000106 | -0.67983 | 6.303503 | 6.983332 |
| 229383_at   | 1-Mar        | 0.000107 | -0.83857 | 6.753194 | 7.591762 |
| 205159_at   | CSF2RB       | 0.000109 | -0.67914 | 8.705814 | 9.384952 |
| 219666_at   | MS4A6A       | 0.00011  | -1.14474 | 7.58271  | 8.72745  |
| 212188_at   | KCTD12       | 0.000112 | -1.24071 | 7.675565 | 8.916278 |
| 211306_s_at | FCAR         | 0.000113 | -0.66868 | 4.552549 | 5.221228 |
| 211612_s_at | IL13RA1      | 0.000114 | -0.67334 | 6.471353 | 7.144689 |
| 203979_at   | CYP27A1      | 0.000114 | -0.6746  | 5.037475 | 5.712077 |
| 217763_s_at | RAB31        | 0.000115 | -1.17496 | 6.861697 | 8.036652 |
| 229937_x_at | LILRB1       | 0.000115 | -0.96316 | 6.403852 | 7.367009 |
| 225897_at   | MARCKS       | 0.000117 | -0.95023 | 6.115856 | 7.06609  |
| 210113_s_at | NLRP1        | 0.000118 | -0.73952 | 5.354804 | 6.094323 |
| 210166_at   | TLR5         | 0.000119 | -0.62354 | 6.430758 | 7.054295 |
| 242814_at   | SERPINB9     | 0.00012  | -0.75538 | 7.098903 | 7.854286 |
| 217897_at   | FXYD6        | 0.00012  | -0.74113 | 5.540326 | 6.281455 |
| 215666_at   | HLA-DRB4     | 0.000123 | -0.86107 | 4.845589 | 5.706661 |
| 223816_at   | SLC46A2      | 0.000126 | -0.60355 | 4.595053 | 5.198599 |
| 214054_at   | DOK2         | 0.000129 | -0.72447 | 7.151688 | 7.876156 |
| 235818_at   | VSTM1        | 0.00013  | -0.84088 | 4.90095  | 5.741826 |
| 204858_s_at | TYMP         | 0.00013  | -0.94484 | 6.57112  | 7.515963 |
| 229228_at   | CREB5        | 0.000132 | -0.71774 | 5.467084 | 6.184828 |
| 227995_at   | LOC100509635 | 0.000133 | -0.63466 | 5.382875 | 6.017532 |
| 225009_at   | CMTM4        | 0.000133 | -0.587   | 6.320541 | 6.90754  |
| 207704_s_at | GAS7         | 0.000135 | -0.61763 | 6.733803 | 7.351436 |
| 49306_at    | RASSF4       | 0.000135 | -0.73447 | 6.048187 | 6.782662 |
| 206278_at   | PTAFR        | 0.000137 | -0.62633 | 5.561423 | 6.187752 |
| 219714_s_at | CACNA2D3     | 0.00014  | -0.73284 | 5.142161 | 5.874998 |
| 205098_at   | CCR1         | 0.000141 | -0.97219 | 6.884819 | 7.857013 |
| 221042_s_at | CLMN         | 0.000145 | -0.60689 | 4.938184 | 5.545073 |
| 239336_at   | THBS1        | 0.000145 | -0.76978 | 4.60792  | 5.377699 |
| 208540_x_at | S100A11      | 0.000148 | -0.76145 | 8.58073  | 9.34218  |
| 223344_s_at | MS4A7        | 0.00015  | -0.91279 | 6.790738 | 7.703533 |
| 201939_at   | PLK2         | 0.00015  | -0.72825 | 5.278722 | 6.006974 |
| 201109_s_at | THBS1        | 0.000152 | -1.13896 | 5.429123 | 6.568087 |
| 211101_x_at | LILRA2       | 0.000161 | -0.81655 | 7.42776  | 8.244313 |
| 228685_at   | IL17RA       | 0.000161 | -0.63929 | 6.756329 | 7.395616 |
| 225798_at   | JAZF1        | 0.000161 | -0.83163 | 6.74136  | 7.572986 |
| 224356_x_at | MS4A6A       | 0.000165 | -1.17976 | 7.945364 | 9.12512  |
| 210146_x_at | LILRB2       | 0.000166 | -1.08181 | 6.827963 | 7.909774 |
| 204759_at   | RCBTB2       | 0.000172 | -0.61523 | 7.005374 | 7.620602 |
| 206034_at   | SERPINB8     | 0.000172 | -0.69664 | 5.945838 | 6.642483 |
| 204319_s_at | RGS10        | 0.000176 | -0.67685 | 7.066855 | 7.743704 |

|              |           |          |          |          |          |
|--------------|-----------|----------|----------|----------|----------|
| 202833_s_at  | SERPINA1  | 0.000178 | -1.4978  | 8.172471 | 9.670273 |
| 239012_at    | RNF144B   | 0.000183 | -0.62672 | 5.450904 | 6.077628 |
| 204620_s_at  | VCAN      | 0.000183 | -1.37792 | 8.85911  | 10.23703 |
| 208594_x_at  | LILRA6    | 0.000184 | -0.90206 | 6.85908  | 7.761138 |
| 206743_s_at  | ASGR1     | 0.000184 | -0.67772 | 4.435721 | 5.113444 |
| 218831_s_at  | FCGRT     | 0.000186 | -0.87677 | 7.152253 | 8.029026 |
| 218810_at    | ZC3H12A   | 0.000189 | -0.76687 | 6.894491 | 7.661363 |
| 238320_at    | NEAT1     | 0.000191 | -0.65665 | 8.909219 | 9.565869 |
| 200660_at    | S100A11   | 0.0002   | -0.94483 | 8.658157 | 9.602992 |
| 1559975_at   | BTG1      | 0.000202 | -0.65533 | 6.784144 | 7.439477 |
| 226841_at    | MPEG1     | 0.000202 | -1.35131 | 7.679872 | 9.031179 |
| 218319_at    | PELI1     | 0.000208 | -0.779   | 8.140044 | 8.91904  |
| 1559502_s_at | LRRC25    | 0.000208 | -0.98164 | 6.603009 | 7.584647 |
| 226818_at    | MPEG1     | 0.000208 | -1.35946 | 8.338094 | 9.697555 |
| 204896_s_at  | PTGER4    | 0.00021  | -0.82134 | 6.021128 | 6.842472 |
| 217728_at    | S100A6    | 0.000216 | -0.83168 | 9.183363 | 10.01504 |
| 233555_s_at  | SULF2     | 0.000216 | -0.86619 | 5.817417 | 6.683604 |
| 232213_at    | PELI1     | 0.000218 | -0.71192 | 7.400108 | 8.112024 |
| 217818_s_at  | ARPC4     | 0.000221 | -0.72828 | 6.188056 | 6.916338 |
| 207113_s_at  | TNF       | 0.000222 | -0.92169 | 5.939994 | 6.861688 |
| 1559883_s_at | SAMHD1    | 0.000229 | -0.85855 | 7.022946 | 7.8815   |
| 238893_at    | LOC338758 | 0.000229 | -0.79126 | 8.807861 | 9.59912  |
| 220532_s_at  | TMEM176B  | 0.000233 | -1.1299  | 6.504096 | 7.633991 |
| 203388_at    | ARRB2     | 0.000238 | -0.59975 | 8.86062  | 9.460374 |
| 212647_at    | RRAS      | 0.000238 | -0.6725  | 5.609571 | 6.282074 |
| 225626_at    | PAG1      | 0.00024  | -0.61913 | 6.792742 | 7.411871 |
| 204103_at    | CCL4      | 0.000246 | -1.15414 | 6.665001 | 7.819145 |
| 211367_s_at  | CASP1     | 0.000249 | -0.59993 | 7.918002 | 8.517933 |
| 202498_s_at  | SLC2A3    | 0.000251 | -0.73711 | 7.395765 | 8.132873 |
| 201888_s_at  | IL13RA1   | 0.000252 | -0.68823 | 5.818746 | 6.506976 |
| 235458_at    | HAVCR2    | 0.000258 | -0.72513 | 6.219569 | 6.944695 |
| 205241_at    | SCO2      | 0.000278 | -0.59105 | 7.469586 | 8.060631 |
| 202087_s_at  | CTSL1     | 0.000278 | -0.68649 | 6.776813 | 7.463305 |
| 241098_at    | CLEC7A    | 0.000287 | -0.68774 | 4.426574 | 5.114317 |
| 209791_at    | PADI2     | 0.000288 | -0.7508  | 6.027592 | 6.778397 |
| 235421_at    | MAP3K8    | 0.000294 | -0.61036 | 6.788226 | 7.398584 |
| 213716_s_at  | SECTM1    | 0.000304 | -0.86196 | 6.380836 | 7.242795 |
| 205819_at    | MARCO     | 0.000305 | -0.69749 | 4.582801 | 5.280286 |
| 203066_at    | CHST15    | 0.000308 | -1.02974 | 6.205673 | 7.235412 |
| 210772_at    | FPR2      | 0.000309 | -0.67274 | 5.428892 | 6.101635 |
| 225245_x_at  | H2AFJ     | 0.00032  | -0.59819 | 7.000515 | 7.598709 |
| 205476_at    | CCL20     | 0.000324 | -0.99598 | 4.463314 | 5.459295 |
| 242197_x_at  | CD36      | 0.00033  | -0.76182 | 5.288904 | 6.050724 |
| 212464_s_at  | FN1       | 0.000333 | -0.69565 | 4.655202 | 5.350852 |
| 210569_s_at  | SIGLEC9   | 0.000371 | -0.6021  | 4.486024 | 5.088122 |



|              |          |          |          |          |          |
|--------------|----------|----------|----------|----------|----------|
| 224596_at    | SLC44A1  | 0.000373 | -0.62418 | 9.234417 | 9.858598 |
| 209684_at    | RIN2     | 0.000386 | -0.71192 | 5.981099 | 6.693017 |
| 213446_s_at  | IQGAP1   | 0.000396 | -0.60182 | 7.996199 | 8.598019 |
| 1554173_at   | CD300LB  | 0.000404 | -0.62775 | 5.665913 | 6.293659 |
| 212830_at    | MEGF9    | 0.000418 | -0.76521 | 7.872601 | 8.637812 |
| 206359_at    | SOCS3    | 0.000428 | -0.61291 | 5.967657 | 6.580566 |
| 208438_s_at  | FGR      | 0.000433 | -0.96985 | 8.535822 | 9.505676 |
| 221731_x_at  | VCAN     | 0.000449 | -1.39521 | 8.890808 | 10.28601 |
| 229101_at    | IL17RA   | 0.00045  | -0.62829 | 8.190233 | 8.818527 |
| 202340_x_at  | NR4A1    | 0.000457 | -0.78476 | 6.114019 | 6.898778 |
| 201108_s_at  | THBS1    | 0.000459 | -0.85074 | 5.529849 | 6.380585 |
| 202497_x_at  | SLC2A3   | 0.000467 | -0.72853 | 8.227928 | 8.956462 |
| 204057_at    | IRF8     | 0.000478 | -0.78304 | 8.259723 | 9.042767 |
| 201110_s_at  | THBS1    | 0.000489 | -1.04051 | 5.944678 | 6.985191 |
| 232724_at    | MS4A6A   | 0.00049  | -0.67048 | 5.586548 | 6.257027 |
| 224358_s_at  | MS4A7    | 0.000502 | -0.76674 | 6.224173 | 6.990916 |
| 1553906_s_at | FGD2     | 0.000502 | -0.71466 | 8.125548 | 8.840204 |
| 211719_x_at  | FN1      | 0.000509 | -0.74892 | 4.649568 | 5.398489 |
| 211661_x_at  | PTAFR    | 0.000516 | -0.6659  | 7.226701 | 7.892603 |
| 210495_x_at  | FN1      | 0.000519 | -0.72246 | 4.787968 | 5.510431 |
| 209949_at    | NCF2     | 0.000529 | -1.21014 | 7.988664 | 9.198807 |
| 207275_s_at  | ACSL1    | 0.00054  | -0.74514 | 8.410457 | 9.155596 |
| 212196_at    | IL6ST    | 0.000542 | -0.6044  | 6.400657 | 7.005057 |
| 200999_s_at  | CKAP4    | 0.00055  | -0.80934 | 6.829627 | 7.638971 |
| 234985_at    | LDLRAD3  | 0.00055  | -0.76083 | 5.998618 | 6.759452 |
| 204655_at    | CCL5     | 0.000555 | -0.5881  | 7.774449 | 8.362553 |
| 229560_at    | TLR8     | 0.000627 | -1.03396 | 7.075289 | 8.109247 |
| 203973_s_at  | CEBPD    | 0.000629 | -0.93734 | 9.321231 | 10.25857 |
| 209581_at    | PLA2G16  | 0.000635 | -0.66916 | 4.840749 | 5.509906 |
| 1405_i_at    | CCL5     | 0.000685 | -0.78226 | 7.400067 | 8.182323 |
| 218345_at    | TMEM176A | 0.000687 | -0.9117  | 6.458347 | 7.370047 |
| 205715_at    | BST1     | 0.000687 | -0.73    | 6.10296  | 6.832957 |
| 1567628_at   | CD74     | 0.000688 | -0.78    | 8.537264 | 9.317263 |
| 219890_at    | CLEC5A   | 0.000736 | -0.7957  | 5.614784 | 6.410487 |
| 220146_at    | TLR7     | 0.000756 | -0.67276 | 5.195141 | 5.867904 |
| 205174_s_at  | QPCT     | 0.000758 | -0.60935 | 4.98143  | 5.590784 |
| 1555349_a_at | ITGB2    | 0.000763 | -0.60666 | 10.49587 | 11.10253 |
| 209728_at    | HLA-DRB4 | 0.000774 | -1.53138 | 6.021607 | 7.552982 |
| 226722_at    | FAM20C   | 0.000796 | -0.61659 | 5.380696 | 5.997284 |
| 200766_at    | CTSD     | 0.000803 | -0.61151 | 8.521239 | 9.132748 |
| 203508_at    | TNFRSF1B | 0.000823 | -0.74207 | 7.711185 | 8.453256 |
| 211924_s_at  | PLAUR    | 0.000828 | -0.80027 | 8.09948  | 8.899753 |
| 217762_s_at  | RAB31    | 0.000838 | -1.00556 | 7.139975 | 8.145532 |
| 207072_at    | IL18RAP  | 0.000846 | -0.67523 | 5.375525 | 6.050755 |
| 202859_x_at  | IL8      | 0.000848 | -0.99537 | 9.826633 | 10.822   |

|              |           |          |          |          |          |
|--------------|-----------|----------|----------|----------|----------|
| 219505_at    | CECR1     | 0.00093  | -0.84808 | 8.936696 | 9.784774 |
| 208894_at    | HLA-DRA   | 0.000936 | -0.86141 | 10.52419 | 11.3856  |
| 201107_s_at  | THBS1     | 0.001    | -0.61208 | 4.494745 | 5.106824 |
| 206940_s_at  | POU4F1    | 0.001009 | -0.67459 | 4.94603  | 5.620615 |
| 204502_at    | SAMHD1    | 0.001011 | -0.9438  | 7.80657  | 8.750371 |
| 201373_at    | PLEC      | 0.001017 | -0.59619 | 5.968115 | 6.564307 |
| 202499_s_at  | SLC2A3    | 0.001018 | -0.64223 | 8.346703 | 8.988937 |
| 235306_at    | GIMAP8    | 0.001026 | -0.65274 | 6.04302  | 6.695758 |
| 211506_s_at  | IL8       | 0.00105  | -1.08075 | 8.402024 | 9.482774 |
| 208981_at    | PECAM1    | 0.001067 | -0.61655 | 9.336252 | 9.952805 |
| 219093_at    | PID1      | 0.001097 | -0.6196  | 4.843722 | 5.463322 |
| 211991_s_at  | HLA-DPA1  | 0.001098 | -0.94602 | 9.149905 | 10.09593 |
| 214366_s_at  | ALOX5     | 0.001102 | -0.72378 | 6.137406 | 6.861182 |
| 201163_s_at  | IGFBP7    | 0.001107 | -0.5873  | 9.360844 | 9.94814  |
| 211990_at    | HLA-DPA1  | 0.001112 | -0.79313 | 10.45658 | 11.24971 |
| 200838_at    | CTSB      | 0.001116 | -0.61906 | 9.46918  | 10.08824 |
| 227396_at    | PTPRJ     | 0.001151 | -0.73743 | 7.062924 | 7.800358 |
| 1563088_a_at | LOC284837 | 0.001185 | -0.64354 | 5.692539 | 6.336082 |
| 225175_s_at  | SLC44A2   | 0.001193 | -0.59343 | 5.907763 | 6.501194 |
| 213566_at    | RNASE6    | 0.001207 | -1.06964 | 7.249108 | 8.318752 |
| 201422_at    | IFI30     | 0.001233 | -1.19417 | 8.844132 | 10.03831 |
| 228532_at    | C1orf162  | 0.001238 | -0.64406 | 8.809535 | 9.453597 |
| 223343_at    | MS4A7     | 0.00127  | -0.89264 | 8.089348 | 8.981992 |
| 232304_at    | PELI1     | 0.001278 | -0.68864 | 7.177742 | 7.866379 |
| 224724_at    | SULF2     | 0.001323 | -0.85376 | 7.017951 | 7.871715 |
| 212192_at    | KCTD12    | 0.00142  | -1.08655 | 7.876868 | 8.963421 |
| 201963_at    | ACSL1     | 0.00144  | -0.63659 | 9.145901 | 9.782489 |
| 208983_s_at  | PECAM1    | 0.001445 | -0.63539 | 8.302681 | 8.93807  |
| 209683_at    | FAM49A    | 0.001458 | -0.58891 | 6.214303 | 6.803208 |
| 231124_x_at  | LY9       | 0.001504 | -0.58714 | 5.975968 | 6.563105 |
| 232068_s_at  | TLR4      | 0.001538 | -0.77163 | 6.097734 | 6.869366 |
| 226436_at    | RASSF4    | 0.001543 | -0.79604 | 7.24909  | 8.045128 |
| 203773_x_at  | BLVRA     | 0.001582 | -0.59364 | 6.613156 | 7.206793 |
| 205220_at    | HCAR3     | 0.001585 | -0.8668  | 6.534194 | 7.400998 |
| 219279_at    | DOCK10    | 0.001704 | -0.70591 | 6.962113 | 7.668022 |
| 210982_s_at  | HLA-DRA   | 0.001705 | -0.92008 | 10.16277 | 11.08285 |
| 218232_at    | C1QA      | 0.001837 | -0.76943 | 5.383984 | 6.153414 |
| 211474_s_at  | SERPINB6  | 0.001871 | -0.5857  | 8.20934  | 8.795043 |
| 1555759_a_at | CCL5      | 0.001883 | -0.6313  | 7.10553  | 7.736834 |
| 211372_s_at  | IL1R2     | 0.001922 | -0.69334 | 4.815358 | 5.508697 |
| 217764_s_at  | RAB31     | 0.001936 | -0.84836 | 7.926955 | 8.775314 |
| 205249_at    | EGR2      | 0.001975 | -0.67822 | 5.610348 | 6.28857  |
| 204794_at    | DUSP2     | 0.002052 | -0.72594 | 6.616834 | 7.342773 |
| 220066_at    | NOD2      | 0.002133 | -0.6605  | 6.066724 | 6.72722  |
| 224277_at    | MOP-1     | 0.002134 | -0.59906 | 4.420287 | 5.019348 |

|              |          |          |          |          |          |
|--------------|----------|----------|----------|----------|----------|
| 201162_at    | IGFBP7   | 0.002155 | -0.69115 | 7.862872 | 8.554023 |
| 213241_at    | PLXNC1   | 0.002163 | -0.6077  | 7.854594 | 8.462294 |
| 201044_x_at  | DUSP1    | 0.002214 | -0.64593 | 7.958744 | 8.604672 |
| 223204_at    | FAM198B  | 0.002249 | -0.91262 | 7.277875 | 8.190496 |
| 202007_at    | NID1     | 0.002298 | -0.89467 | 5.469988 | 6.364657 |
| 212998_x_at  | HLA-DQB1 | 0.002303 | -1.05093 | 7.460208 | 8.511142 |
| 202687_s_at  | TNFSF10  | 0.002351 | -0.6171  | 6.511251 | 7.128356 |
| 228056_s_at  | NAPSB    | 0.002448 | -0.71617 | 5.308653 | 6.024826 |
| 205403_at    | IL1R2    | 0.002582 | -0.73608 | 5.306744 | 6.042823 |
| 201811_x_at  | SH3BP5   | 0.002584 | -0.60026 | 7.366324 | 7.966588 |
| 204787_at    | VSIG4    | 0.002671 | -0.64809 | 5.746116 | 6.394201 |
| 204621_s_at  | NR4A2    | 0.002902 | -0.68889 | 8.063423 | 8.75231  |
| 212993_at    | NACC2    | 0.002945 | -0.63739 | 6.267435 | 6.904827 |
| 219243_at    | GIMAP4   | 0.002945 | -0.70764 | 5.888597 | 6.596233 |
| 209616_s_at  | CES1     | 0.002986 | -0.75488 | 5.389587 | 6.144468 |
| 201506_at    | TGFBI    | 0.003107 | -0.82839 | 5.670766 | 6.499152 |
| 223168_at    | RHOU     | 0.003214 | -0.63073 | 6.37449  | 7.005215 |
| 228094_at    | AMICA1   | 0.003217 | -0.74063 | 7.202711 | 7.943337 |
| 211302_s_at  | PDE4B    | 0.003272 | -0.66829 | 7.407099 | 8.075385 |
| 216015_s_at  | NLRP3    | 0.003379 | -0.67504 | 6.360279 | 7.035315 |
| 210512_s_at  | VEGFA    | 0.003528 | -0.63984 | 6.572391 | 7.212233 |
| 204470_at    | CXCL1    | 0.00359  | -0.58722 | 5.41446  | 6.001683 |
| 201393_s_at  | IGF2R    | 0.003715 | -0.75513 | 6.924197 | 7.679332 |
| 220091_at    | SLC2A6   | 0.003819 | -0.62414 | 5.928607 | 6.552745 |
| 206380_s_at  | CFP      | 0.003839 | -0.73356 | 7.915656 | 8.649216 |
| 1554997_a_at | PTGS2    | 0.00391  | -0.81902 | 6.011836 | 6.830856 |
| 227265_at    | FGL2     | 0.004095 | -0.94602 | 8.606341 | 9.552365 |
| 220266_s_at  | KLF4     | 0.004319 | -0.7093  | 7.442947 | 8.152251 |
| 214329_x_at  | TNFSF10  | 0.004695 | -0.65267 | 6.414328 | 7.067    |
| 210845_s_at  | PLAUR    | 0.004742 | -0.67052 | 8.740113 | 9.410634 |
| 202284_s_at  | CDKN1A   | 0.005008 | -0.60756 | 7.377775 | 7.98533  |
| 227184_at    | PTAFR    | 0.00513  | -0.59504 | 8.473261 | 9.0683   |
| 204112_s_at  | HNMT     | 0.005173 | -0.77009 | 6.111453 | 6.881541 |
| 217143_s_at  | YME1L1   | 0.00552  | -0.59081 | 5.868867 | 6.459676 |
| 204748_at    | PTGS2    | 0.005545 | -0.77941 | 7.028158 | 7.807568 |
| 228766_at    | CD36     | 0.005605 | -0.77742 | 8.32487  | 9.102287 |
| 202510_s_at  | TNFAIP2  | 0.005633 | -0.58812 | 8.390278 | 8.978402 |
| 202917_s_at  | S100A8   | 0.005681 | -1.06114 | 10.0832  | 11.14433 |
| 207794_at    | CCR2     | 0.005847 | -0.61884 | 6.040878 | 6.659723 |
| 211864_s_at  | MYOF     | 0.005983 | -0.6564  | 5.821984 | 6.478385 |
| 221558_s_at  | LEF1     | 0.006079 | -0.71325 | 6.380833 | 7.09408  |
| 200872_at    | S100A10  | 0.006614 | -0.65685 | 9.619589 | 10.27644 |
| 216248_s_at  | NR4A2    | 0.006743 | -0.68193 | 8.014288 | 8.696218 |
| 201137_s_at  | HLA-DPB1 | 0.006849 | -0.69009 | 9.590469 | 10.28056 |
| 202688_at    | TNFSF10  | 0.00696  | -0.64772 | 7.494082 | 8.141799 |

|              |          |          |          |          |          |
|--------------|----------|----------|----------|----------|----------|
| 204622_x_at  | NR4A2    | 0.0071   | -0.6741  | 8.087097 | 8.761199 |
| 203708_at    | PDE4B    | 0.007132 | -0.71694 | 7.571509 | 8.288454 |
| 231577_s_at  | GBP1     | 0.008655 | -0.65048 | 6.188489 | 6.838967 |
| 202391_at    | BASP1    | 0.009813 | -0.80116 | 7.876467 | 8.677627 |
| 204141_at    | TUBB2A   | 0.010032 | -0.65912 | 6.097405 | 6.75652  |
| 210427_x_at  | ANXA2    | 0.01026  | -0.60813 | 9.403321 | 10.01145 |
| 209774_x_at  | CXCL2    | 0.010609 | -0.77181 | 8.014726 | 8.78654  |
| 235964_x_at  | SAMHD1   | 0.011765 | -0.7287  | 8.789307 | 9.518008 |
| 201798_s_at  | MYOF     | 0.013034 | -0.66839 | 6.626148 | 7.29454  |
| 201590_x_at  | ANXA2    | 0.013458 | -0.59642 | 9.406298 | 10.00271 |
| 202820_at    | AHR      | 0.014847 | -0.59056 | 8.279072 | 8.869627 |
| 203290_at    | HLA-DQA1 | 0.015291 | -0.60598 | 5.436743 | 6.042724 |
| 213503_x_at  | ANXA2    | 0.015777 | -0.6056  | 9.287027 | 9.89263  |
| 228055_at    | NAPSB    | 0.016381 | -0.69557 | 6.310889 | 7.006464 |
| 234987_at    | SAMHD1   | 0.017    | -0.6921  | 9.096218 | 9.788319 |
| 200762_at    | DPYSL2   | 0.017366 | -0.60526 | 8.267419 | 8.872677 |
| 207850_at    | CXCL3    | 0.021428 | -0.65848 | 6.857597 | 7.516078 |
| 206978_at    | CCR2     | 0.023224 | -0.62185 | 6.718405 | 7.340259 |
| 205557_at    | BPI      | 0.025467 | -0.66681 | 5.923219 | 6.590024 |
| 204446_s_at  | ALOX5    | 0.02558  | -0.60971 | 8.132672 | 8.742377 |
| 235529_x_at  | SAMHD1   | 0.026019 | -0.59524 | 9.312416 | 9.90766  |
| 216834_at    | RGS1     | 0.029001 | -0.62085 | 6.626317 | 7.247171 |
| 1555745_a_at | LYZ      | 0.02939  | -0.70725 | 10.66354 | 11.37078 |

**Supplementary Table S3: Correlation between *RUNX1* expression and microRNA profiles using whole-genome high-throughput sequencing**

| microRNA symbol             | Correlation Coefficient | P-value  | False Discover Rate |
|-----------------------------|-------------------------|----------|---------------------|
| hsa-mir-16-2.MIMAT0004518   | 0.561794                | 7.17E-08 | 4.68E-05            |
| hsa-mir-146b.MIMAT0002809   | 0.539189                | 2.95E-07 | 9.62E-05            |
| hsa-mir-146b.MIMAT0004766   | 0.53209                 | 4.50E-07 | 9.79E-05            |
| hsa-mir-16.MIMAT0000069     | 0.482745                | 6.62E-06 | 0.00108             |
| hsa-mir-196b.MIMAT0001080   | 0.475145                | 9.66E-06 | 0.001261            |
| hsa-mir-15b.MIMAT0000417    | 0.462283                | 1.8E-05  | 0.001954            |
| hsa-mir-550.MIMAT0004800    | 0.456991                | 2.3E-05  | 0.002145            |
| hsa-mir-1249.MIMAT0005901   | -0.44456                | 4.05E-05 | 0.00311             |
| hsa-mir-940.MIMAT0004983    | -0.4433                 | 4.29E-05 | 0.00311             |
| hsa-let-7a.MIMAT0000062     | 0.42284                 | 0.000104 | 0.006147            |
| hsa-mir-193a.MIMAT0004614   | -0.42424                | 9.76E-05 | 0.006147            |
| hsa-mir-320c.MIMAT0005793   | 0.41689                 | 0.000132 | 0.007207            |
| hsa-mir-125a.MIMAT0000443   | 0.400943                | 0.00025  | 0.012583            |
| hsa-let-7e.MIMAT0000066     | 0.393968                | 0.000328 | 0.01261             |
| hsa-let-7e.MIMAT0004485     | 0.39366                 | 0.000332 | 0.01261             |
| hsa-mir-1307.MIMAT0005951   | -0.39776                | 0.000283 | 0.01261             |
| hsa-mir-133a.MIMAT0000427   | 0.390996                | 0.000367 | 0.01261             |
| hsa-mir-22.MIMAT0000077     | -0.39675                | 0.000295 | 0.01261             |
| hsa-mir-23a.MIMAT0000078    | -0.39171                | 0.000357 | 0.01261             |
| hsa-mir-92a-1.MIMAT0004507  | 0.377269                | 0.000609 | 0.019899            |
| hsa-mir-1289.MIMAT0005879   | 0.369158                | 0.000814 | 0.024166            |
| hsa-mir-876.MIMAT0004924    | 0.369158                | 0.000814 | 0.024166            |
| hsa-mir-551b.MIMAT0003233   | 0.366498                | 0.000894 | 0.025377            |
| hsa-let-7d.MIMAT0000065     | 0.361157                | 0.001076 | 0.028822            |
| hsa-mir-1.MIMAT0000416      | 0.36041                 | 0.001103 | 0.028822            |
| hsa-mir-1323.MIMAT0005795   | 0.353902                | 0.001376 | 0.028985            |
| hsa-mir-135a-1.MIMAT0004595 | 0.354976                | 0.001327 | 0.028985            |
| hsa-mir-15b.MIMAT0004586    | 0.355271                | 0.001314 | 0.028985            |
| hsa-mir-200c.MIMAT0000617   | -0.35441                | 0.001353 | 0.028985            |
| hsa-mir-30b.MIMAT0000420    | 0.35445                 | 0.001351 | 0.028985            |
| hsa-mir-600.MIMAT0003268    | 0.353902                | 0.001376 | 0.028985            |
| hsa-mir-582.MIMAT0004797    | -0.34991                | 0.001572 | 0.032081            |
| hsa-mir-576.MIMAT0003241    | 0.345916                | 0.001793 | 0.035477            |
| hsa-mir-132.MIMAT0000426    | -0.345                  | 0.001847 | 0.035482            |
| hsa-mir-132.MIMAT0004594    | -0.34051                | 0.002137 | 0.037707            |
| hsa-mir-133b.MIMAT0000770   | 0.340571                | 0.002132 | 0.037707            |
| hsa-mir-2110.MIMAT0010133   | -0.34135                | 0.002079 | 0.037707            |
| hsa-mir-187.MIMAT0000262    | -0.33489                | 0.002555 | 0.042416            |
| hsa-mir-22.MIMAT0004495     | -0.33449                | 0.002588 | 0.042416            |
| hsa-mir-651.MIMAT0003321    | 0.334358                | 0.002598 | 0.042416            |
| hsa-mir-99b.MIMAT0000689    | 0.333352                | 0.002682 | 0.042712            |
| hsa-mir-616.MIMAT0003284    | -0.33235                | 0.002767 | 0.04302             |

|                            |          |          |          |
|----------------------------|----------|----------|----------|
| hsa-mir-21.MIMAT0000076    | -0.32892 | 0.003079 | 0.046758 |
| hsa-mir-193a.MIMAT0000459  | -0.32552 | 0.003419 | 0.050736 |
| hsa-mir-501.MIMAT0004774   | -0.3245  | 0.003527 | 0.051178 |
| hsa-mir-326.MIMAT0000756   | -0.32119 | 0.003899 | 0.055347 |
| hsa-mir-550.MIMAT0003257   | 0.320172 | 0.004021 | 0.055864 |
| hsa-mir-1976.MIMAT0009451  | -0.31591 | 0.004567 | 0.06213  |
| hsa-mir-1179.MIMAT0005824  | 0.311755 | 0.005161 | 0.06601  |
| hsa-mir-320b.MIMAT0005792  | 0.311609 | 0.005183 | 0.06601  |
| hsa-mir-320d.MIMAT0006764  | 0.312624 | 0.005031 | 0.06601  |
| hsa-mir-374b.MIMAT0004955  | 0.311124 | 0.005257 | 0.06601  |
| hsa-mir-1266.MIMAT0005920  | 0.309796 | 0.005464 | 0.066071 |
| hsa-mir-30b.MIMAT0004589   | 0.31013  | 0.005411 | 0.066071 |
| hsa-mir-720.MIMAT0005954   | 0.308327 | 0.005701 | 0.06769  |
| hsa-mir-155.MIMAT0000646   | 0.30645  | 0.006018 | 0.068977 |
| hsa-mir-624.MIMAT0003293   | 0.306433 | 0.006021 | 0.068977 |
| hsa-mir-103.MIMAT0000101   | -0.3055  | 0.006184 | 0.069619 |
| hsa-mir-1228.MIMAT0005582  | -0.30381 | 0.00649  | 0.071826 |
| hsa-mir-152.MIMAT0000438   | -0.30301 | 0.006639 | 0.072249 |
| hsa-mir-99b.MIMAT0004678   | 0.302174 | 0.006799 | 0.072778 |
| hsa-mir-449a.MIMAT0001541  | 0.295665 | 0.008158 | 0.085919 |
| hsa-mir-508.MIMAT0002880   | 0.294437 | 0.008439 | 0.087475 |
| hsa-mir-185.MIMAT0004611   | -0.29316 | 0.008742 | 0.089195 |
| hsa-mir-1250.MIMAT0005902  | -0.29169 | 0.0091   | 0.091423 |
| hsa-mir-140.MIMAT0004597   | -0.29033 | 0.009445 | 0.092053 |
| hsa-mir-196b.MIMAT0009201  | 0.290748 | 0.009337 | 0.092053 |
| hsa-mir-582.MIMAT0003247   | -0.28932 | 0.009706 | 0.093211 |
| hsa-mir-125a.MIMAT0004602  | 0.287194 | 0.01028  | 0.093237 |
| hsa-mir-378.MIMAT0000732   | -0.28722 | 0.010272 | 0.093237 |
| hsa-mir-484.MIMAT0002174   | -0.28774 | 0.01013  | 0.093237 |
| hsa-mir-877.MIMAT0004949   | -0.28781 | 0.01011  | 0.093237 |
| hsa-mir-491.MIMAT0002807   | 0.282895 | 0.011531 | 0.101753 |
| hsa-mir-607.MIMAT0003275   | 0.28291  | 0.011526 | 0.101753 |
| hsa-mir-500.MIMAT0002871   | -0.2807  | 0.01222  | 0.106392 |
| hsa-let-7b.MIMAT0004482    | 0.279636 | 0.012566 | 0.107964 |
| hsa-mir-185.MIMAT0000455   | -0.27905 | 0.012758 | 0.108198 |
| hsa-mir-219-1.MIMAT0004567 | 0.273578 | 0.014704 | 0.123098 |
| hsa-let-7f-1.MIMAT0004486  | 0.27133  | 0.015574 | 0.127122 |
| hsa-mir-362.MIMAT0000705   | -0.27174 | 0.015412 | 0.127122 |
| hsa-let-7a.MIMAT0004481    | 0.268414 | 0.016768 | 0.135179 |
| hsa-mir-19b-1.MIMAT0004491 | 0.266058 | 0.017789 | 0.141665 |
| hsa-mir-223.MIMAT0000280   | -0.26473 | 0.018389 | 0.144676 |
| hsa-mir-103-2.MIMAT0009196 | -0.26043 | 0.020447 | 0.154392 |
| hsa-mir-130a.MIMAT0004593  | 0.260744 | 0.020292 | 0.154392 |
| hsa-mir-192.MIMAT0004543   | 0.260488 | 0.020419 | 0.154392 |
| hsa-mir-548k.MIMAT0005882  | 0.260189 | 0.02057  | 0.154392 |

|                            |          |          |          |
|----------------------------|----------|----------|----------|
| hsa-mir-155.MIMAT0004658   | 0.258245 | 0.021569 | 0.160052 |
| hsa-mir-130a.MIMAT0000425  | 0.257085 | 0.022185 | 0.160963 |
| hsa-mir-361.MIMAT0000703   | 0.257294 | 0.022073 | 0.160963 |
| hsa-mir-1538.MIMAT0007400  | -0.25615 | 0.022693 | 0.161074 |
| hsa-mir-629.MIMAT0003298   | 0.256554 | 0.022472 | 0.161074 |
| hsa-mir-25.MIMAT0000081    | 0.243254 | 0.030758 | 0.215971 |
| hsa-mir-212.MIMAT0000269   | -0.24138 | 0.032108 | 0.223052 |
| hsa-mir-551a.MIMAT0003214  | 0.239394 | 0.033598 | 0.23094  |
| hsa-mir-107.MIMAT0000104   | -0.23856 | 0.03424  | 0.232092 |
| hsa-mir-24.MIMAT0000080    | -0.23817 | 0.034541 | 0.232092 |
| hsa-mir-589.MIMAT0004799   | -0.2378  | 0.034832 | 0.232092 |
| hsa-mir-532.MIMAT0002888   | -0.23633 | 0.036002 | 0.237467 |
| hsa-mir-10a.MIMAT0004555   | 0.235879 | 0.036371 | 0.237505 |
| hsa-mir-1234.MIMAT0005589  | 0.235108 | 0.037005 | 0.239247 |
| hsa-mir-24-2.MIMAT0004497  | -0.23262 | 0.039112 | 0.247965 |
| hsa-mir-574.MIMAT0003239   | -0.23303 | 0.03876  | 0.247965 |
| hsa-mir-135a.MIMAT0000428  | 0.230895 | 0.040631 | 0.254588 |
| hsa-mir-30d.MIMAT0004551   | 0.230554 | 0.040937 | 0.254588 |
| hsa-mir-149.MIMAT0000450   | -0.22969 | 0.041716 | 0.256987 |
| hsa-let-7f.MIMAT0000067    | 0.222385 | 0.048857 | 0.296562 |
| hsa-mir-584.MIMAT0003249   | 0.222201 | 0.049049 | 0.296562 |
| hsa-mir-30d.MIMAT0000245   | 0.220067 | 0.051321 | 0.307457 |
| hsa-mir-514.MIMAT0002883   | 0.218682 | 0.052841 | 0.310859 |
| hsa-mir-708.MIMAT0004927   | -0.21877 | 0.052748 | 0.310859 |
| hsa-mir-642.MIMAT0003312   | -0.21775 | 0.053883 | 0.314155 |
| hsa-mir-376b.MIMAT0002172  | -0.21651 | 0.055305 | 0.319592 |
| hsa-let-7g.MIMAT0000414    | 0.213108 | 0.059338 | 0.336936 |
| hsa-mir-502.MIMAT0004775   | -0.21324 | 0.059172 | 0.336936 |
| hsa-mir-221.MIMAT0004568   | -0.21183 | 0.06092  | 0.340424 |
| hsa-mir-92a-2.MIMAT0004508 | 0.211767 | 0.060995 | 0.340424 |
| hsa-mir-1224.MIMAT0005458  | 0.21084  | 0.062161 | 0.343993 |
| hsa-let-7b.MIMAT0000063    | 0.209575 | 0.063783 | 0.350001 |
| hsa-mir-490.MIMAT0002806   | 0.208499 | 0.065189 | 0.354735 |
| hsa-mir-190.MIMAT0000458   | 0.207349 | 0.066718 | 0.360057 |
| hsa-mir-616.MIMAT0004805   | -0.20692 | 0.067293 | 0.360181 |
| hsa-mir-513a.MIMAT0002877  | 0.206411 | 0.067988 | 0.360944 |
| hsa-mir-874.MIMAT0004911   | 0.20342  | 0.072166 | 0.380037 |
| hsa-mir-106b.MIMAT0000680  | 0.201271 | 0.075294 | 0.387142 |
| hsa-mir-548n.MIMAT0005916  | 0.201525 | 0.074918 | 0.387142 |
| hsa-mir-92a.MIMAT0000092   | 0.201881 | 0.074396 | 0.387142 |
| hsa-mir-1914.MIMAT0007889  | -0.19952 | 0.077924 | 0.397534 |
| hsa-mir-151.MIMAT0004697   | 0.197602 | 0.080883 | 0.409432 |
| hsa-mir-106b.MIMAT0004672  | 0.195422 | 0.084357 | 0.418586 |
| hsa-mir-130b.MIMAT0000691  | 0.19511  | 0.084863 | 0.418586 |
| hsa-mir-27b.MIMAT0004588   | 0.194901 | 0.085205 | 0.418586 |

|                            |          |          |          |
|----------------------------|----------|----------|----------|
| hsa-mir-378.MIMAT0000731   | -0.19487 | 0.085256 | 0.418586 |
| hsa-mir-26a.MIMAT0000082   | 0.192372 | 0.089416 | 0.435735 |
| hsa-mir-144.MIMAT0004600   | 0.190282 | 0.093018 | 0.443364 |
| hsa-mir-216b.MIMAT0004959  | 0.190596 | 0.09247  | 0.443364 |
| hsa-mir-589.MIMAT0003256   | -0.19061 | 0.09244  | 0.443364 |
| hsa-mir-194.MIMAT0000460   | 0.189669 | 0.094096 | 0.44525  |
| hsa-mir-548d.MIMAT0003323  | 0.18925  | 0.094838 | 0.445532 |
| hsa-mir-126.MIMAT0000445   | 0.187599 | 0.097808 | 0.454194 |
| hsa-mir-744.MIMAT0004945   | -0.18745 | 0.098073 | 0.454194 |
| hsa-mir-26a-1.MIMAT0004499 | 0.186657 | 0.099536 | 0.457724 |
| hsa-mir-496.MIMAT0002818   | -0.18618 | 0.100413 | 0.458529 |
| hsa-mir-1275.MIMAT0005929  | 0.184779 | 0.103049 | 0.4673   |
| hsa-mir-374a.MIMAT0000727  | 0.184309 | 0.103943 | 0.468104 |
| hsa-mir-188.MIMAT0004613   | -0.18339 | 0.105708 | 0.469893 |
| hsa-mir-21.MIMAT0004494    | -0.18335 | 0.10578  | 0.469893 |
| hsa-mir-1228.MIMAT0005583  | -0.18223 | 0.107967 | 0.476369 |
| hsa-mir-296.MIMAT0000690   | -0.18077 | 0.110875 | 0.485916 |
| hsa-mir-1226.MIMAT0005577  | -0.17876 | 0.114977 | 0.490262 |
| hsa-mir-1254.MIMAT0005905  | 0.178488 | 0.115529 | 0.490262 |
| hsa-mir-27a.MIMAT0000084   | -0.17844 | 0.115621 | 0.490262 |
| hsa-mir-34c.MIMAT0004677   | -0.17864 | 0.115211 | 0.490262 |
| hsa-mir-636.MIMAT0003306   | 0.178493 | 0.11552  | 0.490262 |
| hsa-mir-345.MIMAT0000772   | 0.175605 | 0.121626 | 0.512397 |
| hsa-mir-10a.MIMAT0000253   | 0.174952 | 0.12304  | 0.515031 |
| hsa-mir-139.MIMAT0000250   | -0.17135 | 0.131073 | 0.530394 |
| hsa-mir-141.MIMAT0000432   | -0.16972 | 0.134832 | 0.530394 |
| hsa-mir-215.MIMAT0000272   | -0.17214 | 0.129278 | 0.530394 |
| hsa-mir-26a-2.MIMAT0004681 | 0.172007 | 0.129575 | 0.530394 |
| hsa-mir-423.MIMAT0004748   | 0.17167  | 0.130338 | 0.530394 |
| hsa-mir-508.MIMAT0004778   | 0.170547 | 0.13291  | 0.530394 |
| hsa-mir-611.MIMAT0003279   | 0.170103 | 0.133936 | 0.530394 |
| hsa-mir-628.MIMAT0004809   | -0.1699  | 0.134406 | 0.530394 |
| hsa-mir-7-1.MIMAT0004553   | 0.169758 | 0.134738 | 0.530394 |
| hsa-mir-765.MIMAT0003945   | -0.17215 | 0.129241 | 0.530394 |
| hsa-mir-493.MIMAT0003161   | -0.16894 | 0.136663 | 0.531197 |
| hsa-mir-506.MIMAT0002878   | 0.169062 | 0.13637  | 0.531197 |
| hsa-mir-188.MIMAT0000457   | -0.16831 | 0.13815  | 0.533799 |
| hsa-mir-181d.MIMAT0002821  | 0.16703  | 0.141214 | 0.5415   |
| hsa-mir-489.MIMAT0002805   | -0.16662 | 0.142195 | 0.5415   |
| hsa-mir-625.MIMAT0004808   | 0.166445 | 0.142631 | 0.5415   |
| hsa-mir-572.MIMAT0003237   | -0.16592 | 0.143906 | 0.543182 |
| hsa-mir-937.MIMAT0004980   | -0.16552 | 0.144892 | 0.543763 |
| hsa-mir-641.MIMAT0003311   | 0.165102 | 0.145927 | 0.544516 |
| hsa-mir-513c.MIMAT0005789  | 0.164696 | 0.146936 | 0.545166 |
| hsa-mir-1915.MIMAT0007892  | 0.16371  | 0.149404 | 0.548094 |



|                             |          |          |          |
|-----------------------------|----------|----------|----------|
| hsa-mir-216a.MIMAT0000273   | 0.164021 | 0.148622 | 0.548094 |
| hsa-mir-101-1.MIMAT0004513  | 0.162644 | 0.152109 | 0.554901 |
| hsa-let-7g.MIMAT0004584     | 0.159002 | 0.161621 | 0.583087 |
| hsa-mir-1913.MIMAT0007888   | 0.159027 | 0.161555 | 0.583087 |
| hsa-mir-29c.MIMAT0004673    | 0.157208 | 0.166468 | 0.596698 |
| hsa-mir-548f.MIMAT0005895   | -0.15693 | 0.167222 | 0.596698 |
| hsa-mir-663b.MIMAT0005867   | -0.15558 | 0.170959 | 0.60672  |
| hsa-mir-1271.MIMAT0005796   | 0.15463  | 0.173616 | 0.612817 |
| hsa-mir-1225.MIMAT0005572   | -0.15294 | 0.178413 | 0.623014 |
| hsa-mir-885.MIMAT0004947    | -0.15316 | 0.177798 | 0.623014 |
| hsa-mir-1255a.MIMAT0005906  | -0.1512  | 0.183478 | 0.624015 |
| hsa-mir-183.MIMAT0000261    | -0.15215 | 0.180694 | 0.624015 |
| hsa-mir-184.MIMAT0000454    | 0.151519 | 0.182539 | 0.624015 |
| hsa-mir-320a.MIMAT0000510   | 0.151527 | 0.182516 | 0.624015 |
| hsa-mir-501.MIMAT0002872    | -0.15182 | 0.181649 | 0.624015 |
| hsa-mir-30c-2.MIMAT0004550  | -0.15048 | 0.185583 | 0.627658 |
| hsa-mir-877.MIMAT0004950    | -0.15018 | 0.186471 | 0.627658 |
| hsa-mir-18a.MIMAT0002891    | 0.149859 | 0.187434 | 0.627665 |
| hsa-mir-425.MIMAT0003393    | -0.14942 | 0.188756 | 0.628864 |
| hsa-mir-30a.MIMAT0000088    | -0.14834 | 0.192003 | 0.636437 |
| hsa-mir-190b.MIMAT0004929   | -0.14317 | 0.208132 | 0.642096 |
| hsa-mir-20a.MIMAT0004493    | 0.14566  | 0.200241 | 0.642096 |
| hsa-mir-211.MIMAT0000268    | -0.14638 | 0.198003 | 0.642096 |
| hsa-mir-217.MIMAT0000274    | 0.147136 | 0.195671 | 0.642096 |
| hsa-mir-218.MIMAT0000275    | -0.143   | 0.208658 | 0.642096 |
| hsa-mir-29a.MIMAT0004503    | -0.14297 | 0.208784 | 0.642096 |
| hsa-mir-31.MIMAT0004504     | 0.146061 | 0.198993 | 0.642096 |
| hsa-mir-330.MIMAT0000751    | -0.14441 | 0.204173 | 0.642096 |
| hsa-mir-340.MIMAT0004692    | -0.14279 | 0.209351 | 0.642096 |
| hsa-mir-374b.MIMAT0004956   | 0.144505 | 0.203872 | 0.642096 |
| hsa-mir-454.MIMAT0003884    | -0.14387 | 0.205889 | 0.642096 |
| hsa-mir-541.MIMAT0004919    | -0.14363 | 0.20666  | 0.642096 |
| hsa-mir-548a-3.MIMAT0004803 | -0.14353 | 0.206965 | 0.642096 |
| hsa-mir-625.MIMAT0003294    | 0.14276  | 0.209443 | 0.642096 |
| hsa-mir-629.MIMAT0004810    | 0.143852 | 0.205945 | 0.642096 |
| hsa-mir-934.MIMAT0004977    | -0.14377 | 0.206211 | 0.642096 |
| hsa-mir-365.MIMAT0000710    | -0.14175 | 0.212719 | 0.646072 |
| hsa-mir-451.MIMAT0001631    | 0.14178  | 0.212621 | 0.646072 |
| hsa-mir-628.MIMAT0003297    | -0.13993 | 0.218726 | 0.661243 |
| hsa-mir-148a.MIMAT0004549   | -0.13952 | 0.220091 | 0.6623   |
| hsa-mir-760.MIMAT0004957    | 0.1392   | 0.221147 | 0.662426 |
| hsa-let-7c.MIMAT0004483     | -0.13559 | 0.233469 | 0.672254 |
| hsa-mir-106a.MIMAT0004517   | 0.137392 | 0.227264 | 0.672254 |
| hsa-mir-129.MIMAT0000242    | -0.13791 | 0.225486 | 0.672254 |
| hsa-mir-138-1.MIMAT0004607  | -0.13697 | 0.228694 | 0.672254 |

|                            |          |          |          |
|----------------------------|----------|----------|----------|
| hsa-mir-202.MIMAT0002811   | -0.13547 | 0.233884 | 0.672254 |
| hsa-mir-204.MIMAT0000265   | -0.13577 | 0.232841 | 0.672254 |
| hsa-mir-30a.MIMAT0000087   | -0.13722 | 0.227855 | 0.672254 |
| hsa-mir-361.MIMAT0004682   | 0.136233 | 0.231245 | 0.672254 |
| hsa-mir-509.MIMAT0002881   | 0.135232 | 0.234723 | 0.672254 |
| hsa-mir-664.MIMAT0005949   | 0.136114 | 0.231657 | 0.672254 |
| hsa-mir-1185.MIMAT0005798  | -0.13423 | 0.238243 | 0.676402 |
| hsa-mir-338.MIMAT0004701   | -0.13442 | 0.237577 | 0.676402 |
| hsa-let-7f-2.MIMAT0004487  | 0.132257 | 0.245276 | 0.677437 |
| hsa-mir-126.MIMAT0000444   | 0.132651 | 0.243858 | 0.677437 |
| hsa-mir-145.MIMAT0004601   | -0.13322 | 0.241831 | 0.677437 |
| hsa-mir-301a.MIMAT0000688  | -0.13181 | 0.246907 | 0.677437 |
| hsa-mir-365-2.MIMAT0009199 | -0.13353 | 0.240709 | 0.677437 |
| hsa-mir-539.MIMAT0003163   | -0.13306 | 0.242388 | 0.677437 |
| hsa-mir-708.MIMAT0004926   | -0.13193 | 0.24646  | 0.677437 |
| hsa-mir-873.MIMAT0004953   | -0.13211 | 0.24581  | 0.677437 |
| hsa-mir-7.MIMAT0000252     | -0.13151 | 0.247979 | 0.677531 |
| hsa-mir-18a.MIMAT0000072   | -0.13067 | 0.251033 | 0.679263 |
| hsa-mir-192.MIMAT0000222   | 0.130787 | 0.250607 | 0.679263 |
| hsa-mir-33b.MIMAT0004811   | 0.13048  | 0.251733 | 0.679263 |
| hsa-mir-146a.MIMAT0000449  | 0.127517 | 0.262753 | 0.680863 |
| hsa-mir-20a.MIMAT0000075   | 0.129395 | 0.255728 | 0.680863 |
| hsa-mir-20b.MIMAT0001413   | 0.128621 | 0.258608 | 0.680863 |
| hsa-mir-432.MIMAT0002814   | -0.12752 | 0.262723 | 0.680863 |
| hsa-mir-433.MIMAT0001627   | -0.12907 | 0.25692  | 0.680863 |
| hsa-mir-483.MIMAT0004761   | 0.129524 | 0.255252 | 0.680863 |
| hsa-mir-543.MIMAT0004954   | -0.12854 | 0.258916 | 0.680863 |
| hsa-mir-624.MIMAT0004807   | 0.129285 | 0.256138 | 0.680863 |
| hsa-mir-664.MIMAT0005948   | 0.128201 | 0.260181 | 0.680863 |
| hsa-mir-876.MIMAT0004925   | -0.12768 | 0.262151 | 0.680863 |
| hsa-mir-346.MIMAT0000773   | -0.12648 | 0.266697 | 0.688353 |
| hsa-mir-1226.MIMAT0005576  | -0.12499 | 0.272413 | 0.697592 |
| hsa-mir-548l.MIMAT0005889  | 0.125198 | 0.271603 | 0.697592 |
| hsa-mir-301b.MIMAT0004958  | -0.12436 | 0.274854 | 0.701092 |
| hsa-mir-429.MIMAT0001536   | -0.12357 | 0.277943 | 0.706214 |
| hsa-mir-101.MIMAT0000099   | 0.119638 | 0.293627 | 0.712438 |
| hsa-mir-10b.MIMAT0000254   | -0.11796 | 0.300509 | 0.712438 |
| hsa-mir-1180.MIMAT0005825  | -0.12156 | 0.285905 | 0.712438 |
| hsa-mir-1256.MIMAT0005907  | -0.1176  | 0.302005 | 0.712438 |
| hsa-mir-1306.MIMAT0005950  | -0.12056 | 0.289916 | 0.712438 |
| hsa-mir-137.MIMAT0000429   | 0.119525 | 0.294087 | 0.712438 |
| hsa-mir-139.MIMAT0004552   | -0.11755 | 0.302213 | 0.712438 |
| hsa-mir-18b.MIMAT0001412   | -0.121   | 0.288113 | 0.712438 |
| hsa-mir-1909.MIMAT0007883  | 0.119123 | 0.295726 | 0.712438 |
| hsa-mir-197.MIMAT0000227   | -0.12022 | 0.291285 | 0.712438 |

|                             |          |          |          |
|-----------------------------|----------|----------|----------|
| hsa-mir-29a.MIMAT0000086    | 0.119203 | 0.295401 | 0.712438 |
| hsa-mir-32.MIMAT0000090     | 0.119694 | 0.293401 | 0.712438 |
| hsa-mir-33a.MIMAT0000091    | -0.11773 | 0.301453 | 0.712438 |
| hsa-mir-380.MIMAT0000735    | -0.1193  | 0.294995 | 0.712438 |
| hsa-mir-423.MIMAT0001340    | 0.11763  | 0.301863 | 0.712438 |
| hsa-mir-513b.MIMAT0005788   | 0.122346 | 0.282759 | 0.712438 |
| hsa-mir-548j.MIMAT0005875   | 0.118097 | 0.299935 | 0.712438 |
| hsa-mir-581.MIMAT0003246    | -0.1201  | 0.291757 | 0.712438 |
| hsa-mir-610.MIMAT0003278    | 0.119103 | 0.295809 | 0.712438 |
| hsa-mir-744.MIMAT0004946    | -0.12124 | 0.287179 | 0.712438 |
| hsa-mir-23b.MIMAT0000418    | -0.11519 | 0.312088 | 0.73307  |
| hsa-mir-145.MIMAT0000437    | -0.11334 | 0.319963 | 0.7447   |
| hsa-mir-200b.MIMAT0004571   | -0.11318 | 0.32065  | 0.7447   |
| hsa-mir-411.MIMAT0003329    | -0.11296 | 0.321601 | 0.7447   |
| hsa-mir-592.MIMAT0003260    | -0.11362 | 0.318774 | 0.7447   |
| hsa-mir-148b.MIMAT0004699   | 0.112187 | 0.324941 | 0.749776 |
| hsa-mir-182.MIMAT0000260    | -0.1109  | 0.330545 | 0.751457 |
| hsa-mir-218-2.MIMAT0004566  | -0.11064 | 0.331704 | 0.751457 |
| hsa-mir-31.MIMAT0000089     | 0.110441 | 0.332574 | 0.751457 |
| hsa-mir-654.MIMAT0003330    | -0.11067 | 0.331581 | 0.751457 |
| hsa-mir-663.MIMAT0003326    | -0.11066 | 0.331613 | 0.751457 |
| hsa-mir-767.MIMAT0003883    | 0.1112   | 0.329242 | 0.751457 |
| hsa-mir-1915.MIMAT0007891   | 0.110113 | 0.334022 | 0.752125 |
| hsa-mir-1287.MIMAT0005878   | 0.106954 | 0.348156 | 0.760354 |
| hsa-mir-136.MIMAT0000448    | -0.10809 | 0.343049 | 0.760354 |
| hsa-mir-27b.MIMAT0000419    | 0.108995 | 0.338979 | 0.760354 |
| hsa-mir-29b-1.MIMAT0004514  | 0.108015 | 0.343367 | 0.760354 |
| hsa-mir-324.MIMAT0000762    | -0.10758 | 0.345309 | 0.760354 |
| hsa-mir-335.MIMAT0004703    | -0.10827 | 0.342226 | 0.760354 |
| hsa-mir-34b.MIMAT0000685    | 0.107922 | 0.343784 | 0.760354 |
| hsa-mir-369.MIMAT0001621    | -0.10714 | 0.347308 | 0.760354 |
| hsa-mir-943.MIMAT0004986    | -0.107   | 0.347926 | 0.760354 |
| hsa-mir-143.MIMAT0000435    | -0.10569 | 0.353898 | 0.765218 |
| hsa-mir-28.MIMAT0000085     | 0.106059 | 0.352229 | 0.765218 |
| hsa-mir-653.MIMAT0003328    | -0.10589 | 0.352984 | 0.765218 |
| hsa-mir-1284.MIMAT0005941   | -0.10518 | 0.356263 | 0.766924 |
| hsa-mir-19b.MIMAT0000074    | 0.10501  | 0.357037 | 0.766924 |
| hsa-mir-181a-1.MIMAT0000270 | -0.10443 | 0.359704 | 0.770121 |
| hsa-mir-105.MIMAT0000102    | -0.09528 | 0.403579 | 0.782009 |
| hsa-mir-1204.MIMAT0005868   | -0.09573 | 0.40134  | 0.782009 |
| hsa-mir-1227.MIMAT0005580   | -0.10087 | 0.376402 | 0.782009 |
| hsa-mir-124.MIMAT0004591    | 0.10094  | 0.376081 | 0.782009 |
| hsa-mir-1298.MIMAT0005800   | -0.09876 | 0.386537 | 0.782009 |
| hsa-mir-142.MIMAT0000433    | 0.095931 | 0.400346 | 0.782009 |
| hsa-mir-154.MIMAT0000452    | -0.09848 | 0.387884 | 0.782009 |

|                             |          |          |          |
|-----------------------------|----------|----------|----------|
| hsa-mir-199a.MIMAT0000231   | -0.09955 | 0.382725 | 0.782009 |
| hsa-mir-328.MIMAT0000752    | -0.09702 | 0.394983 | 0.782009 |
| hsa-mir-330.MIMAT0004693    | -0.10195 | 0.371306 | 0.782009 |
| hsa-mir-335.MIMAT0000765    | -0.09853 | 0.387651 | 0.782009 |
| hsa-mir-382.MIMAT0000737    | -0.09607 | 0.399647 | 0.782009 |
| hsa-mir-409.MIMAT0001639    | -0.09694 | 0.395366 | 0.782009 |
| hsa-mir-505.MIMAT0004776    | 0.096746 | 0.396338 | 0.782009 |
| hsa-mir-512.MIMAT0002823    | -0.09528 | 0.403579 | 0.782009 |
| hsa-mir-516b.MIMAT0002859   | -0.09528 | 0.403579 | 0.782009 |
| hsa-mir-517c.MIMAT0002866   | -0.09528 | 0.403579 | 0.782009 |
| hsa-mir-518a.MIMAT0005457   | -0.09528 | 0.403579 | 0.782009 |
| hsa-mir-518c.MIMAT0002847   | -0.09528 | 0.403579 | 0.782009 |
| hsa-mir-518e.MIMAT0002861   | -0.09528 | 0.403579 | 0.782009 |
| hsa-mir-518f.MIMAT0002842   | -0.09528 | 0.403579 | 0.782009 |
| hsa-mir-519a-1.MIMAT0005452 | -0.09528 | 0.403579 | 0.782009 |
| hsa-mir-519a.MIMAT0002869   | -0.09528 | 0.403579 | 0.782009 |
| hsa-mir-519d.MIMAT0002853   | -0.09528 | 0.403579 | 0.782009 |
| hsa-mir-520a.MIMAT0002834   | -0.09528 | 0.403579 | 0.782009 |
| hsa-mir-520d.MIMAT0002856   | -0.09528 | 0.403579 | 0.782009 |
| hsa-mir-522.MIMAT0002868    | -0.09528 | 0.403579 | 0.782009 |
| hsa-mir-526b.MIMAT0002835   | -0.09528 | 0.403579 | 0.782009 |
| hsa-mir-527.MIMAT0002862    | -0.09528 | 0.403579 | 0.782009 |
| hsa-mir-891a.MIMAT0004902   | -0.09972 | 0.381913 | 0.782009 |
| hsa-mir-98.MIMAT0000096     | -0.10044 | 0.378466 | 0.782009 |
| hsa-mir-99a.MIMAT0004511    | 0.095938 | 0.400311 | 0.782009 |
| hsa-mir-214.MIMAT0004564    | -0.09478 | 0.406054 | 0.784476 |
| hsa-mir-598.MIMAT0003266    | -0.09427 | 0.408602 | 0.787071 |
| hsa-mir-100.MIMAT0004512    | 0.0895   | 0.432809 | 0.792407 |
| hsa-mir-1236.MIMAT0005591   | -0.09173 | 0.421401 | 0.792407 |
| hsa-mir-1247.MIMAT0005899   | 0.090265 | 0.428873 | 0.792407 |
| hsa-mir-1277.MIMAT0005933   | -0.08739 | 0.443788 | 0.792407 |
| hsa-mir-1285.MIMAT0005876   | -0.08933 | 0.433691 | 0.792407 |
| hsa-mir-1286.MIMAT0005877   | 0.087127 | 0.445157 | 0.792407 |
| hsa-mir-129-2.MIMAT0004605  | 0.086886 | 0.446422 | 0.792407 |
| hsa-mir-1291.MIMAT0005881   | 0.092432 | 0.417827 | 0.792407 |
| hsa-mir-134.MIMAT0000447    | -0.08972 | 0.431688 | 0.792407 |
| hsa-mir-182.MIMAT0000259    | -0.09204 | 0.419793 | 0.792407 |
| hsa-mir-191.MIMAT0001618    | -0.08948 | 0.432899 | 0.792407 |
| hsa-mir-214.MIMAT0000271    | -0.09127 | 0.423733 | 0.792407 |
| hsa-mir-223.MIMAT0004570    | -0.09061 | 0.427127 | 0.792407 |
| hsa-mir-28.MIMAT0004502     | 0.092193 | 0.419039 | 0.792407 |
| hsa-mir-299.MIMAT0000687    | -0.08992 | 0.430654 | 0.792407 |
| hsa-mir-29b-2.MIMAT0004515  | 0.088325 | 0.4389   | 0.792407 |
| hsa-mir-29c.MIMAT0000681    | 0.090166 | 0.429379 | 0.792407 |
| hsa-mir-34c.MIMAT0000686    | -0.08891 | 0.435859 | 0.792407 |

|                            |          |          |          |
|----------------------------|----------|----------|----------|
| hsa-mir-363.MIMAT0003385   | 0.090324 | 0.428571 | 0.792407 |
| hsa-mir-421.MIMAT0003339   | -0.08686 | 0.446563 | 0.792407 |
| hsa-mir-485.MIMAT0002176   | -0.0871  | 0.445295 | 0.792407 |
| hsa-mir-497.MIMAT0002820   | -0.08978 | 0.431353 | 0.792407 |
| hsa-mir-499.MIMAT0002870   | -0.08787 | 0.441297 | 0.792407 |
| hsa-mir-551b.MIMAT0004794  | 0.093147 | 0.414218 | 0.792407 |
| hsa-mir-556.MIMAT0004793   | -0.09336 | 0.413135 | 0.792407 |
| hsa-mir-564.MIMAT0003228   | -0.0889  | 0.435898 | 0.792407 |
| hsa-mir-606.MIMAT0003274   | -0.08712 | 0.445184 | 0.792407 |
| hsa-mir-658.MIMAT0003336   | -0.09188 | 0.420604 | 0.792407 |
| hsa-mir-93.MIMAT0004509    | 0.087402 | 0.443716 | 0.792407 |
| hsa-mir-1292.MIMAT0005943  | -0.08639 | 0.449044 | 0.793062 |
| hsa-mir-143.MIMAT0004599   | -0.08633 | 0.449362 | 0.793062 |
| hsa-mir-1911.MIMAT0007885  | -0.08581 | 0.452073 | 0.79455  |
| hsa-mir-29b.MIMAT0000100   | 0.085707 | 0.452638 | 0.79455  |
| hsa-mir-138-2.MIMAT0004596 | -0.08434 | 0.459908 | 0.805147 |
| hsa-mir-363.MIMAT0000707   | 0.083508 | 0.464361 | 0.807334 |
| hsa-mir-379.MIMAT0004690   | -0.08318 | 0.466103 | 0.807334 |
| hsa-mir-495.MIMAT0002817   | -0.08324 | 0.465795 | 0.807334 |
| hsa-mir-802.MIMAT0004185   | -0.08351 | 0.464337 | 0.807334 |
| hsa-mir-520g.MIMAT0002858  | -0.08251 | 0.469725 | 0.811457 |
| hsa-mir-1257.MIMAT0005908  | 0.078564 | 0.491311 | 0.812245 |
| hsa-mir-127.MIMAT0004604   | -0.08056 | 0.480329 | 0.812245 |
| hsa-mir-129-1.MIMAT0004548 | 0.077664 | 0.496303 | 0.812245 |
| hsa-mir-1301.MIMAT0005797  | 0.079934 | 0.483761 | 0.812245 |
| hsa-mir-138.MIMAT0000430   | -0.07799 | 0.494501 | 0.812245 |
| hsa-mir-144.MIMAT0000436   | -0.07981 | 0.484459 | 0.812245 |
| hsa-mir-1910.MIMAT0007884  | 0.081306 | 0.476264 | 0.812245 |
| hsa-mir-218-1.MIMAT0004565 | -0.0788  | 0.490009 | 0.812245 |
| hsa-mir-24-1.MIMAT0000079  | -0.07811 | 0.49382  | 0.812245 |
| hsa-mir-338.MIMAT0000763   | -0.07768 | 0.496206 | 0.812245 |
| hsa-mir-340.MIMAT0000750   | -0.07889 | 0.489492 | 0.812245 |
| hsa-mir-490.MIMAT0004764   | 0.078564 | 0.491311 | 0.812245 |
| hsa-mir-497.MIMAT0004768   | -0.08103 | 0.477747 | 0.812245 |
| hsa-mir-511.MIMAT0002808   | -0.08036 | 0.481421 | 0.812245 |
| hsa-mir-518c.MIMAT0002848  | -0.08042 | 0.481091 | 0.812245 |
| hsa-mir-520h.MIMAT0002867  | -0.07792 | 0.494875 | 0.812245 |
| hsa-mir-532.MIMAT0004780   | -0.08044 | 0.480976 | 0.812245 |
| hsa-mir-548b.MIMAT0003254  | -0.07806 | 0.494092 | 0.812245 |
| hsa-mir-612.MIMAT0003280   | -0.08101 | 0.477874 | 0.812245 |
| hsa-mir-671.MIMAT0003880   | 0.080443 | 0.480973 | 0.812245 |
| hsa-mir-887.MIMAT0004951   | -0.07789 | 0.495026 | 0.812245 |
| hsa-mir-1262.MIMAT0005914  | -0.07558 | 0.507979 | 0.813015 |
| hsa-mir-1269.MIMAT0005923  | -0.07689 | 0.500603 | 0.813015 |
| hsa-mir-1304.MIMAT0005892  | 0.075687 | 0.507363 | 0.813015 |

|                           |          |          |          |
|---------------------------|----------|----------|----------|
| hsa-mir-148a.MIMAT0000243 | -0.07665 | 0.501958 | 0.813015 |
| hsa-mir-1914.MIMAT0007890 | 0.076383 | 0.503454 | 0.813015 |
| hsa-mir-373.MIMAT0000726  | 0.076045 | 0.50535  | 0.813015 |
| hsa-mir-377.MIMAT0004689  | 0.076822 | 0.500998 | 0.813015 |
| hsa-mir-493.MIMAT0002813  | -0.07701 | 0.499943 | 0.813015 |
| hsa-mir-92b.MIMAT0004792  | -0.07577 | 0.506905 | 0.813015 |
| hsa-mir-106a.MIMAT0000103 | 0.074054 | 0.516593 | 0.814751 |
| hsa-mir-1181.MIMAT0005826 | -0.07371 | 0.518572 | 0.814751 |
| hsa-mir-127.MIMAT0000446  | -0.07369 | 0.518682 | 0.814751 |
| hsa-mir-337.MIMAT0004695  | -0.07362 | 0.519045 | 0.814751 |
| hsa-mir-34b.MIMAT0004676  | -0.07454 | 0.513843 | 0.814751 |
| hsa-mir-379.MIMAT0000733  | -0.0749  | 0.511809 | 0.814751 |
| hsa-mir-505.MIMAT0002876  | 0.073716 | 0.518515 | 0.814751 |
| hsa-mir-654.MIMAT0004814  | -0.07423 | 0.515583 | 0.814751 |
| hsa-mir-410.MIMAT0002171  | -0.07243 | 0.525843 | 0.823442 |
| hsa-mir-369.MIMAT0000721  | -0.07196 | 0.528544 | 0.823721 |
| hsa-mir-381.MIMAT0000736  | -0.07218 | 0.527307 | 0.823721 |
| hsa-mir-1276.MIMAT0005930 | -0.07152 | 0.531082 | 0.825098 |
| hsa-mir-17.MIMAT0000070   | 0.071149 | 0.533218 | 0.825098 |
| hsa-mir-30c.MIMAT0000244  | 0.071314 | 0.532268 | 0.825098 |
| hsa-mir-1229.MIMAT0005584 | 0.069595 | 0.542225 | 0.825223 |
| hsa-mir-151.MIMAT0000757  | 0.070351 | 0.537836 | 0.825223 |
| hsa-mir-186.MIMAT0004612  | 0.069809 | 0.540981 | 0.825223 |
| hsa-mir-302d.MIMAT0000718 | -0.07011 | 0.539236 | 0.825223 |
| hsa-mir-487b.MIMAT0003180 | -0.06947 | 0.542965 | 0.825223 |
| hsa-mir-542.MIMAT0003389  | -0.06955 | 0.542471 | 0.825223 |
| hsa-mir-769.MIMAT0003886  | 0.069391 | 0.543409 | 0.825223 |
| hsa-mir-92b.MIMAT0003218  | 0.070831 | 0.535058 | 0.825223 |
| hsa-mir-425.MIMAT0001343  | -0.06911 | 0.545069 | 0.825824 |
| hsa-mir-136.MIMAT0004606  | -0.06777 | 0.552905 | 0.826194 |
| hsa-mir-141.MIMAT0004598  | -0.06844 | 0.548936 | 0.826194 |
| hsa-mir-23b.MIMAT0004587  | 0.067899 | 0.552134 | 0.826194 |
| hsa-mir-337.MIMAT0000754  | -0.06876 | 0.547113 | 0.826194 |
| hsa-mir-517a.MIMAT0002852 | -0.06811 | 0.550918 | 0.826194 |
| hsa-mir-517b.MIMAT0002857 | -0.06811 | 0.550918 | 0.826194 |
| hsa-let-7a-2.MIMAT0010195 | 0.067133 | 0.556639 | 0.828445 |
| hsa-mir-25.MIMAT0004498   | 0.06708  | 0.556949 | 0.828445 |
| hsa-mir-100.MIMAT0000098  | 0.066586 | 0.559865 | 0.830891 |
| hsa-mir-375.MIMAT0000728  | -0.0662  | 0.562171 | 0.83242  |
| hsa-mir-19a.MIMAT0000073  | 0.065731 | 0.564924 | 0.832721 |
| hsa-mir-380.MIMAT0000734  | -0.06583 | 0.564346 | 0.832721 |
| hsa-mir-485.MIMAT0002175  | -0.06505 | 0.568956 | 0.836776 |
| hsa-mir-140.MIMAT0000431  | -0.06368 | 0.577179 | 0.84129  |
| hsa-mir-146a.MIMAT0004608 | 0.063696 | 0.577058 | 0.84129  |
| hsa-mir-579.MIMAT0003244  | 0.063738 | 0.576807 | 0.84129  |

|                             |          |          |          |
|-----------------------------|----------|----------|----------|
| hsa-mir-675.MIMAT0006790    | 0.064123 | 0.574503 | 0.84129  |
| hsa-mir-135b.MIMAT0004698   | -0.06299 | 0.581306 | 0.845418 |
| hsa-let-7i.MIMAT0004585     | 0.061735 | 0.588862 | 0.851369 |
| hsa-mir-181c.MIMAT0000258   | 0.06104  | 0.593071 | 0.851369 |
| hsa-mir-200b.MIMAT0000318   | -0.06115 | 0.592387 | 0.851369 |
| hsa-mir-323.MIMAT0000755    | -0.06136 | 0.591115 | 0.851369 |
| hsa-mir-33b.MIMAT0003301    | -0.06107 | 0.592896 | 0.851369 |
| hsa-mir-499.MIMAT0004772    | -0.06081 | 0.594441 | 0.851369 |
| hsa-mir-573.MIMAT0003238    | 0.060801 | 0.594524 | 0.851369 |
| hsa-mir-200a.MIMAT0001620   | -0.06044 | 0.596716 | 0.852638 |
| hsa-mir-181a-2.MIMAT0004558 | 0.06017  | 0.598363 | 0.853124 |
| hsa-mir-889.MIMAT0004921    | -0.05969 | 0.601291 | 0.855431 |
| hsa-mir-665.MIMAT0004952    | -0.05911 | 0.604815 | 0.858574 |
| hsa-mir-770.MIMAT0003948    | 0.058811 | 0.606669 | 0.859338 |
| hsa-mir-339.MIMAT0000764    | -0.05845 | 0.608869 | 0.859797 |
| hsa-mir-33a.MIMAT0004506    | -0.05833 | 0.609626 | 0.859797 |
| hsa-mir-452.MIMAT0001636    | -0.05698 | 0.617945 | 0.866314 |
| hsa-mir-766.MIMAT0003888    | -0.05693 | 0.618227 | 0.866314 |
| hsa-mir-96.MIMAT0004510     | -0.0573  | 0.615958 | 0.866314 |
| hsa-mir-125b.MIMAT0000423   | 0.05526  | 0.628595 | 0.876999 |
| hsa-mir-590.MIMAT0004801    | 0.055054 | 0.629882 | 0.876999 |
| hsa-mir-942.MIMAT0004985    | 0.055344 | 0.628073 | 0.876999 |
| hsa-let-7i.MIMAT0000415     | 0.053545 | 0.639308 | 0.879779 |
| hsa-mir-128.MIMAT0000424    | -0.05259 | 0.645285 | 0.879779 |
| hsa-mir-1293.MIMAT0005883   | -0.05269 | 0.644664 | 0.879779 |
| hsa-mir-1912.MIMAT0007887   | -0.05221 | 0.647673 | 0.879779 |
| hsa-mir-196a-2.MIMAT0004562 | 0.053979 | 0.636591 | 0.879779 |
| hsa-mir-196a.MIMAT0000226   | 0.051667 | 0.651121 | 0.879779 |
| hsa-mir-376c.MIMAT0000720   | -0.05352 | 0.639487 | 0.879779 |
| hsa-mir-409.MIMAT0001638    | 0.05381  | 0.637646 | 0.879779 |
| hsa-mir-449b.MIMAT00009203  | -0.05245 | 0.646178 | 0.879779 |
| hsa-mir-541.MIMAT0004920    | -0.05208 | 0.648542 | 0.879779 |
| hsa-mir-597.MIMAT0003265    | -0.05357 | 0.639167 | 0.879779 |
| hsa-mir-617.MIMAT0003286    | -0.05189 | 0.649712 | 0.879779 |
| hsa-mir-618.MIMAT0003287    | 0.051815 | 0.650187 | 0.879779 |
| hsa-mir-933.MIMAT0004976    | -0.05221 | 0.647671 | 0.879779 |
| hsa-mir-944.MIMAT0004987    | 0.051514 | 0.652087 | 0.879779 |
| hsa-mir-1909.MIMAT0007882   | -0.05064 | 0.657612 | 0.883581 |
| hsa-mir-577.MIMAT0003242    | -0.05065 | 0.657576 | 0.883581 |
| hsa-mir-181c.MIMAT0004559   | 0.049991 | 0.661735 | 0.885477 |
| hsa-mir-639.MIMAT0003309    | -0.05006 | 0.661311 | 0.885477 |
| hsa-mir-486.MIMAT0002177    | -0.04935 | 0.66581  | 0.887294 |
| hsa-mir-99a.MIMAT0000097    | 0.049371 | 0.66568  | 0.887294 |
| hsa-mir-494.MIMAT0002816    | 0.048453 | 0.671536 | 0.893101 |
| hsa-mir-19a.MIMAT0004490    | 0.047971 | 0.674618 | 0.89445  |

|                             |          |          |          |
|-----------------------------|----------|----------|----------|
| hsa-mir-32.MIMAT0004505     | -0.04787 | 0.675289 | 0.89445  |
| hsa-mir-296.MIMAT0004679    | -0.04715 | 0.679877 | 0.898704 |
| hsa-mir-191.MIMAT0000440    | 0.046567 | 0.683623 | 0.90173  |
| hsa-mir-205.MIMAT0000266    | -0.04579 | 0.688602 | 0.90173  |
| hsa-mir-370.MIMAT0000722    | -0.04567 | 0.689385 | 0.90173  |
| hsa-mir-376a-1.MIMAT0003386 | 0.045151 | 0.69276  | 0.90173  |
| hsa-mir-455.MIMAT0003150    | 0.046155 | 0.68628  | 0.90173  |
| hsa-mir-590.MIMAT0003258    | -0.04487 | 0.694594 | 0.90173  |
| hsa-mir-605.MIMAT0003273    | -0.04519 | 0.692497 | 0.90173  |
| hsa-mir-660.MIMAT0003338    | -0.04498 | 0.693838 | 0.90173  |
| hsa-mir-939.MIMAT0004982    | 0.045027 | 0.693562 | 0.90173  |
| hsa-mir-1537.MIMAT0007399   | -0.04406 | 0.699818 | 0.901971 |
| hsa-mir-195.MIMAT0000461    | -0.04358 | 0.702939 | 0.901971 |
| hsa-mir-331.MIMAT0004700    | -0.04356 | 0.703068 | 0.901971 |
| hsa-mir-342.MIMAT0000753    | -0.04368 | 0.702277 | 0.901971 |
| hsa-mir-424.MIMAT0001341    | 0.04458  | 0.696452 | 0.901971 |
| hsa-mir-518b.MIMAT0002844   | -0.0436  | 0.702784 | 0.901971 |
| hsa-mir-671.MIMAT0004819    | -0.04297 | 0.706921 | 0.905136 |
| hsa-let-7d.MIMAT0004484     | 0.042688 | 0.708743 | 0.905657 |
| hsa-mir-1182.MIMAT0005827   | 0.041843 | 0.714257 | 0.905657 |
| hsa-mir-183.MIMAT0004560    | -0.0419  | 0.713873 | 0.905657 |
| hsa-mir-627.MIMAT0003296    | 0.042204 | 0.711899 | 0.905657 |
| hsa-mir-938.MIMAT0004981    | -0.04184 | 0.714263 | 0.905657 |
| hsa-mir-1258.MIMAT0005909   | -0.04094 | 0.720139 | 0.908269 |
| hsa-mir-150.MIMAT0004610    | -0.03962 | 0.728841 | 0.908269 |
| hsa-mir-154.MIMAT0000453    | -0.03972 | 0.728161 | 0.908269 |
| hsa-mir-203.MIMAT0000264    | 0.03999  | 0.726405 | 0.908269 |
| hsa-mir-452.MIMAT0001635    | -0.04061 | 0.722344 | 0.908269 |
| hsa-mir-542.MIMAT0003340    | -0.04012 | 0.725545 | 0.908269 |
| hsa-mir-545.MIMAT0004785    | 0.040645 | 0.722106 | 0.908269 |
| hsa-mir-638.MIMAT0003308    | -0.04007 | 0.725902 | 0.908269 |
| hsa-mir-675.MIMAT0004284    | -0.04049 | 0.72313  | 0.908269 |
| hsa-mir-374a.MIMAT0004688   | 0.039363 | 0.730525 | 0.908634 |
| hsa-mir-1973.MIMAT0009448   | -0.03849 | 0.736286 | 0.914059 |
| hsa-mir-1908.MIMAT0007881   | -0.03809 | 0.73894  | 0.915613 |
| hsa-mir-17.MIMAT0000071     | -0.0378  | 0.740872 | 0.916268 |
| hsa-mir-224.MIMAT0000281    | -0.03718 | 0.744964 | 0.918027 |
| hsa-mir-324.MIMAT0000761    | -0.03694 | 0.746512 | 0.918027 |
| hsa-mir-518a.MIMAT0002863   | 0.037049 | 0.745817 | 0.918027 |
| hsa-mir-331.MIMAT0000760    | -0.0364  | 0.750117 | 0.91968  |
| hsa-mir-431.MIMAT0001625    | 0.036317 | 0.750673 | 0.91968  |
| hsa-mir-122.MIMAT0000421    | 0.03606  | 0.752381 | 0.920047 |
| hsa-mir-186.MIMAT0000456    | 0.034986 | 0.759528 | 0.921014 |
| hsa-mir-34a.MIMAT0000255    | -0.03498 | 0.759573 | 0.921014 |
| hsa-mir-450a.MIMAT0001545   | -0.0355  | 0.756124 | 0.921014 |



|                             |          |          |          |
|-----------------------------|----------|----------|----------|
| hsa-mir-504.MIMAT0002875    | 0.034882 | 0.760224 | 0.921014 |
| hsa-mir-632.MIMAT0003302    | -0.03495 | 0.759741 | 0.921014 |
| hsa-mir-10b.MIMAT0004556    | -0.03403 | 0.765935 | 0.925002 |
| hsa-mir-206.MIMAT0000462    | 0.03354  | 0.769183 | 0.925002 |
| hsa-mir-26b.MIMAT0000083    | -0.03356 | 0.769032 | 0.925002 |
| hsa-mir-491.MIMAT0004765    | 0.033595 | 0.768815 | 0.925002 |
| hsa-mir-30e.MIMAT0000693    | -0.03312 | 0.771996 | 0.926679 |
| hsa-mir-18b.MIMAT0004751    | 0.032577 | 0.775633 | 0.929336 |
| hsa-mir-224.MIMAT0009198    | -0.03225 | 0.777859 | 0.930296 |
| hsa-mir-9.MIMAT0000441      | -0.03175 | 0.781158 | 0.932534 |
| hsa-mir-148b.MIMAT0000759   | 0.031513 | 0.782781 | 0.932766 |
| hsa-mir-125b-2.MIMAT0004603 | 0.031051 | 0.785889 | 0.933065 |
| hsa-mir-30c-1.MIMAT0004674  | 0.031111 | 0.785483 | 0.933065 |
| hsa-mir-20b.MIMAT0004752    | 0.029724 | 0.794831 | 0.941968 |
| hsa-mir-588.MIMAT0003255    | -0.02951 | 0.796278 | 0.941974 |
| hsa-mir-147b.MIMAT0004928   | -0.02878 | 0.801215 | 0.94279  |
| hsa-mir-329.MIMAT0001629    | -0.02874 | 0.801498 | 0.94279  |
| hsa-mir-342.MIMAT0004694    | -0.02878 | 0.801234 | 0.94279  |
| hsa-mir-502.MIMAT0002873    | -0.02855 | 0.802743 | 0.94279  |
| hsa-mir-125b-1.MIMAT0004592 | 0.027995 | 0.806525 | 0.943513 |
| hsa-mir-1280.MIMAT0005946   | -0.02521 | 0.825454 | 0.943513 |
| hsa-mir-1294.MIMAT0005884   | 0.026721 | 0.815173 | 0.943513 |
| hsa-mir-193b.MIMAT0004767   | -0.02528 | 0.825003 | 0.943513 |
| hsa-mir-195.MIMAT0004615    | -0.02558 | 0.822953 | 0.943513 |
| hsa-mir-222.MIMAT0004569    | 0.02506  | 0.826477 | 0.943513 |
| hsa-mir-26b.MIMAT0004500    | -0.02635 | 0.817674 | 0.943513 |
| hsa-mir-27a.MIMAT0004501    | 0.025679 | 0.822258 | 0.943513 |
| hsa-mir-34a.MIMAT0004557    | 0.026578 | 0.816147 | 0.943513 |
| hsa-mir-431.MIMAT0004757    | -0.02655 | 0.816348 | 0.943513 |
| hsa-mir-454.MIMAT0003885    | 0.025721 | 0.821972 | 0.943513 |
| hsa-mir-455.MIMAT0004784    | 0.028106 | 0.805778 | 0.943513 |
| hsa-mir-503.MIMAT0002874    | -0.02603 | 0.81988  | 0.943513 |
| hsa-mir-545.MIMAT0003165    | -0.0265  | 0.816706 | 0.943513 |
| hsa-mir-615.MIMAT0003283    | 0.025646 | 0.822481 | 0.943513 |
| hsa-mir-96.MIMAT0000095     | -0.02734 | 0.810969 | 0.943513 |
| hsa-mir-488.MIMAT0004763    | 0.024512 | 0.830216 | 0.946127 |
| hsa-mir-15a.MIMAT0004488    | -0.024   | 0.833676 | 0.947623 |
| hsa-mir-221.MIMAT0000278    | 0.023837 | 0.834821 | 0.947623 |
| hsa-mir-483.MIMAT0002173    | 0.023682 | 0.835882 | 0.947623 |
| hsa-let-7c.MIMAT0000064     | 0.023086 | 0.839955 | 0.95029  |
| hsa-mir-150.MIMAT0000451    | -0.02193 | 0.84785  | 0.95029  |
| hsa-mir-153.MIMAT0000439    | 0.022088 | 0.846786 | 0.95029  |
| hsa-mir-200a.MIMAT0000682   | -0.02227 | 0.845521 | 0.95029  |
| hsa-mir-376a.MIMAT0000729   | 0.021553 | 0.850456 | 0.95029  |
| hsa-mir-449b.MIMAT0003327   | -0.02157 | 0.850362 | 0.95029  |

|                           |          |          |          |
|---------------------------|----------|----------|----------|
| hsa-mir-659.MIMAT0003337  | -0.02143 | 0.851332 | 0.95029  |
| hsa-mir-885.MIMAT0004948  | -0.02157 | 0.850362 | 0.95029  |
| hsa-mir-95.MIMAT0000094   | 0.021428 | 0.851315 | 0.95029  |
| hsa-mir-219.MIMAT0000276  | -0.02101 | 0.854174 | 0.951835 |
| hsa-mir-432.MIMAT0002815  | 0.020561 | 0.857264 | 0.953652 |
| hsa-mir-222.MIMAT0000279  | 0.020176 | 0.859913 | 0.954717 |
| hsa-mir-411.MIMAT0004813  | 0.019996 | 0.861146 | 0.954717 |
| hsa-mir-299.MIMAT0002890  | -0.01868 | 0.870234 | 0.963157 |
| hsa-mir-548e.MIMAT0005874 | -0.01715 | 0.880756 | 0.973153 |
| hsa-mir-93.MIMAT0000093   | 0.016603 | 0.884529 | 0.974026 |
| hsa-mir-935.MIMAT0004978  | -0.01672 | 0.883689 | 0.974026 |
| hsa-mir-1278.MIMAT0005936 | -0.01616 | 0.887557 | 0.974076 |
| hsa-mir-548o.MIMAT0005919 | -0.0163  | 0.886589 | 0.974076 |
| hsa-mir-362.MIMAT0004683  | -0.01542 | 0.892713 | 0.976043 |
| hsa-mir-556.MIMAT0003220  | -0.01526 | 0.893834 | 0.976043 |
| hsa-mir-655.MIMAT0003331  | -0.01562 | 0.891329 | 0.976043 |
| hsa-mir-1288.MIMAT0005942 | -0.01413 | 0.901659 | 0.976424 |
| hsa-mir-142.MIMAT0000434  | -0.0143  | 0.900443 | 0.976424 |
| hsa-mir-199a.MIMAT0000232 | -0.01429 | 0.900508 | 0.976424 |
| hsa-mir-199b.MIMAT0004563 | -0.01416 | 0.901444 | 0.976424 |
| hsa-mir-383.MIMAT0000738  | 0.014782 | 0.89712  | 0.976424 |
| hsa-mir-1246.MIMAT0005898 | 0.011506 | 0.919838 | 0.977214 |
| hsa-mir-1260.MIMAT0005911 | -0.01096 | 0.9236   | 0.977214 |
| hsa-mir-15a.MIMAT0000068  | 0.012683 | 0.911664 | 0.977214 |
| hsa-mir-181a.MIMAT0000256 | -0.01128 | 0.921428 | 0.977214 |
| hsa-mir-181b.MIMAT0000257 | 0.011905 | 0.917064 | 0.977214 |
| hsa-mir-193b.MIMAT0002819 | -0.01233 | 0.914083 | 0.977214 |
| hsa-mir-339.MIMAT0004702  | 0.010893 | 0.924096 | 0.977214 |
| hsa-mir-422a.MIMAT0001339 | -0.01079 | 0.924836 | 0.977214 |
| hsa-mir-450b.MIMAT0004909 | -0.01251 | 0.912894 | 0.977214 |
| hsa-mir-488.MIMAT0002804  | -0.01087 | 0.924245 | 0.977214 |
| hsa-mir-548a.MIMAT0003251 | -0.01087 | 0.924245 | 0.977214 |
| hsa-mir-552.MIMAT0003215  | -0.01335 | 0.907017 | 0.977214 |
| hsa-mir-580.MIMAT0003245  | 0.012841 | 0.910573 | 0.977214 |
| hsa-mir-609.MIMAT0003277  | -0.01079 | 0.924836 | 0.977214 |
| hsa-mir-7-2.MIMAT0004554  | -0.0129  | 0.910145 | 0.977214 |
| hsa-mir-586.MIMAT0003252  | 0.010566 | 0.926369 | 0.977252 |
| hsa-mir-1468.MIMAT0006789 | 0.009547 | 0.93345  | 0.983134 |
| hsa-mir-377.MIMAT0000730  | -0.00929 | 0.935265 | 0.983459 |
| hsa-mir-199b.MIMAT0000263 | 0.008848 | 0.938313 | 0.983811 |
| hsa-mir-210.MIMAT0000267  | 0.008805 | 0.938613 | 0.983811 |
| hsa-mir-1237.MIMAT0005592 | 0.005956 | 0.958454 | 0.987454 |
| hsa-mir-1238.MIMAT0005593 | -0.00633 | 0.955854 | 0.987454 |
| hsa-mir-124.MIMAT0000422  | 0.0057   | 0.960235 | 0.987454 |
| hsa-mir-1248.MIMAT0005900 | 0.005861 | 0.959118 | 0.987454 |

|                            |           |          |          |
|----------------------------|-----------|----------|----------|
| hsa-mir-130b.MIMAT0004680  | -0.00681  | 0.952532 | 0.987454 |
| hsa-mir-149.MIMAT0004609   | 0.005731  | 0.960022 | 0.987454 |
| hsa-mir-200c.MIMAT0004657  | -0.0072   | 0.949818 | 0.987454 |
| hsa-mir-202.MIMAT0002810   | 0.006659  | 0.953556 | 0.987454 |
| hsa-mir-30e.MIMAT0000692   | 0.006965  | 0.951421 | 0.987454 |
| hsa-mir-486.MIMAT0004762   | -0.00637  | 0.955602 | 0.987454 |
| hsa-mir-500.MIMAT0004773   | 0.006306  | 0.956012 | 0.987454 |
| hsa-mir-652.MIMAT0003322   | 0.007424  | 0.948228 | 0.987454 |
| hsa-mir-570.MIMAT0003235   | -0.00521  | 0.963624 | 0.989381 |
| hsa-mir-194-2.MIMAT0004671 | 0.003883  | 0.972907 | 0.99112  |
| hsa-mir-23a.MIMAT0004496   | -0.00433  | 0.969817 | 0.99112  |
| hsa-mir-758.MIMAT0003879   | 0.003919  | 0.972659 | 0.99112  |
| hsa-mir-769.MIMAT0003887   | -0.00417  | 0.970882 | 0.99112  |
| hsa-mir-9.MIMAT0000442     | -0.00429  | 0.970094 | 0.99112  |
| hsa-mir-1295.MIMAT0005885  | -0.00309  | 0.978426 | 0.991859 |
| hsa-mir-135b.MIMAT0000758  | -0.00291  | 0.979708 | 0.991859 |
| hsa-mir-19b-2.MIMAT0004492 | -0.00333  | 0.976794 | 0.991859 |
| hsa-mir-643.MIMAT0003313   | 0.003034  | 0.978829 | 0.991859 |
| hsa-mir-16-1.MIMAT0004489  | -0.00237  | 0.98343  | 0.99255  |
| hsa-mir-875.MIMAT0004923   | -0.00241  | 0.983198 | 0.99255  |
| hsa-mir-487a.MIMAT0002178  | 0.001442  | 0.989934 | 0.997572 |
| hsa-mir-1270.MIMAT0005924  | -7.5E-05  | 0.999479 | 0.999933 |
| hsa-mir-1296.MIMAT0005794  | -0.0006   | 0.995807 | 0.999933 |
| hsa-mir-187.MIMAT0004561   | 0.000397  | 0.997233 | 0.999933 |
| hsa-mir-424.MIMAT0004749   | -9.59E-06 | 0.999933 | 0.999933 |
| hsa-mir-656.MIMAT0003332   | 0.000233  | 0.998373 | 0.999933 |

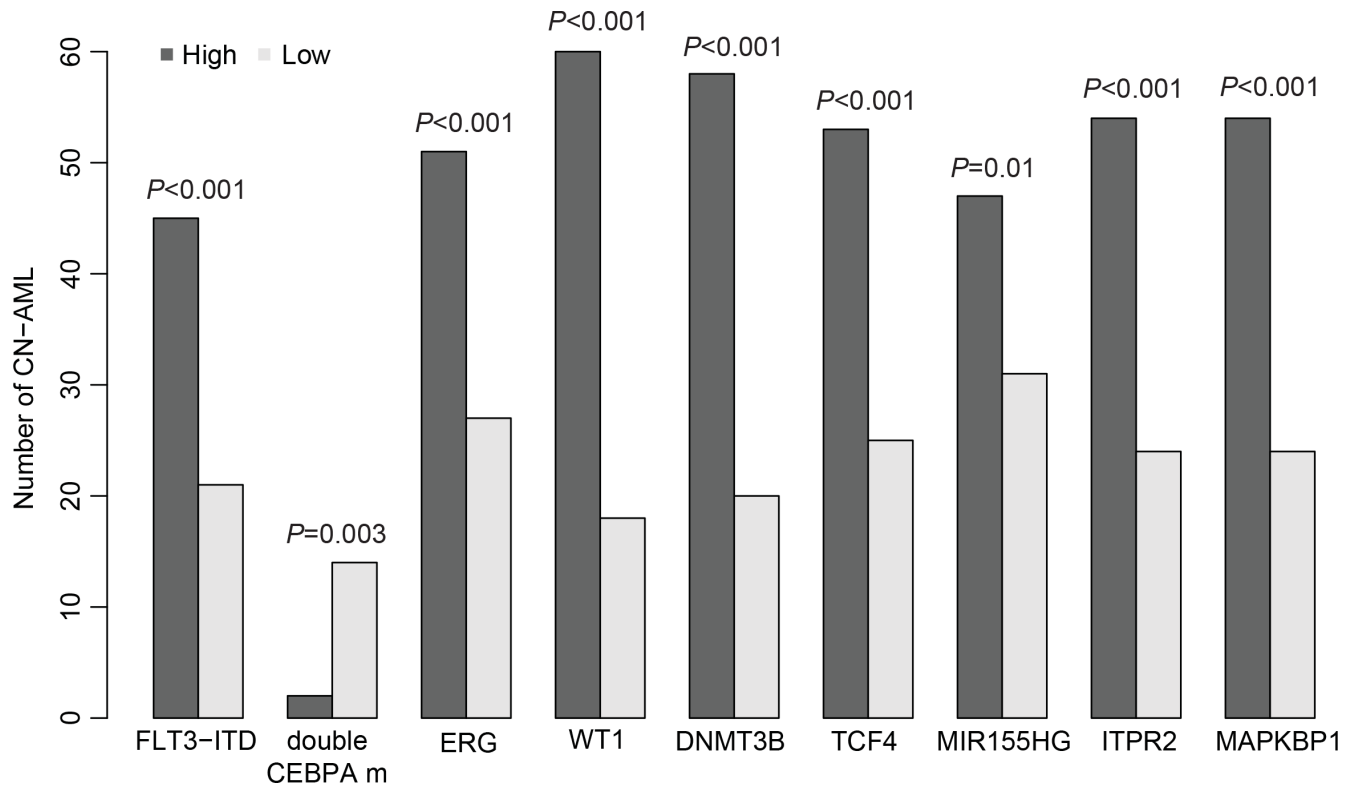

Supplementary Figure S1: Association between *RUNX1* expression and prognostic markers in CN-AML.

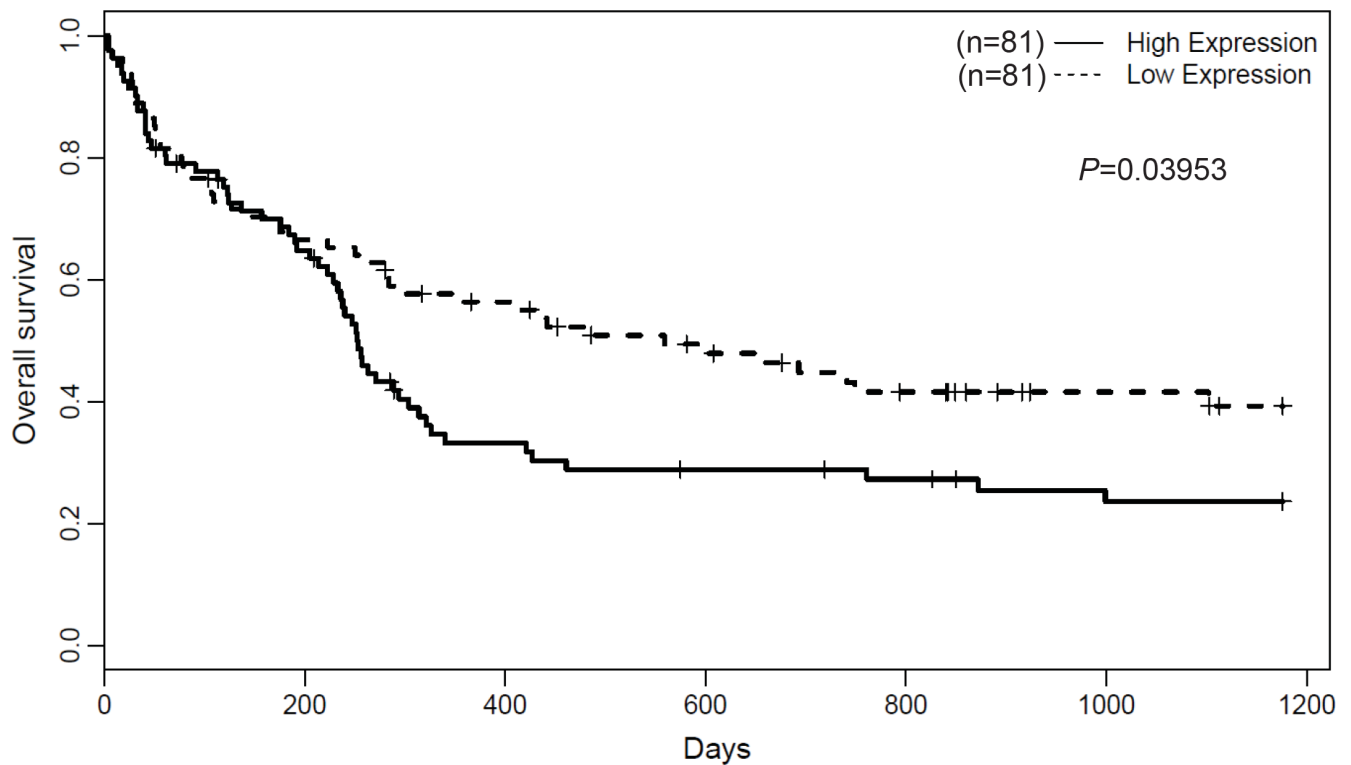

Supplementary Figure S2: OS of CN-AML patients in the validating group.

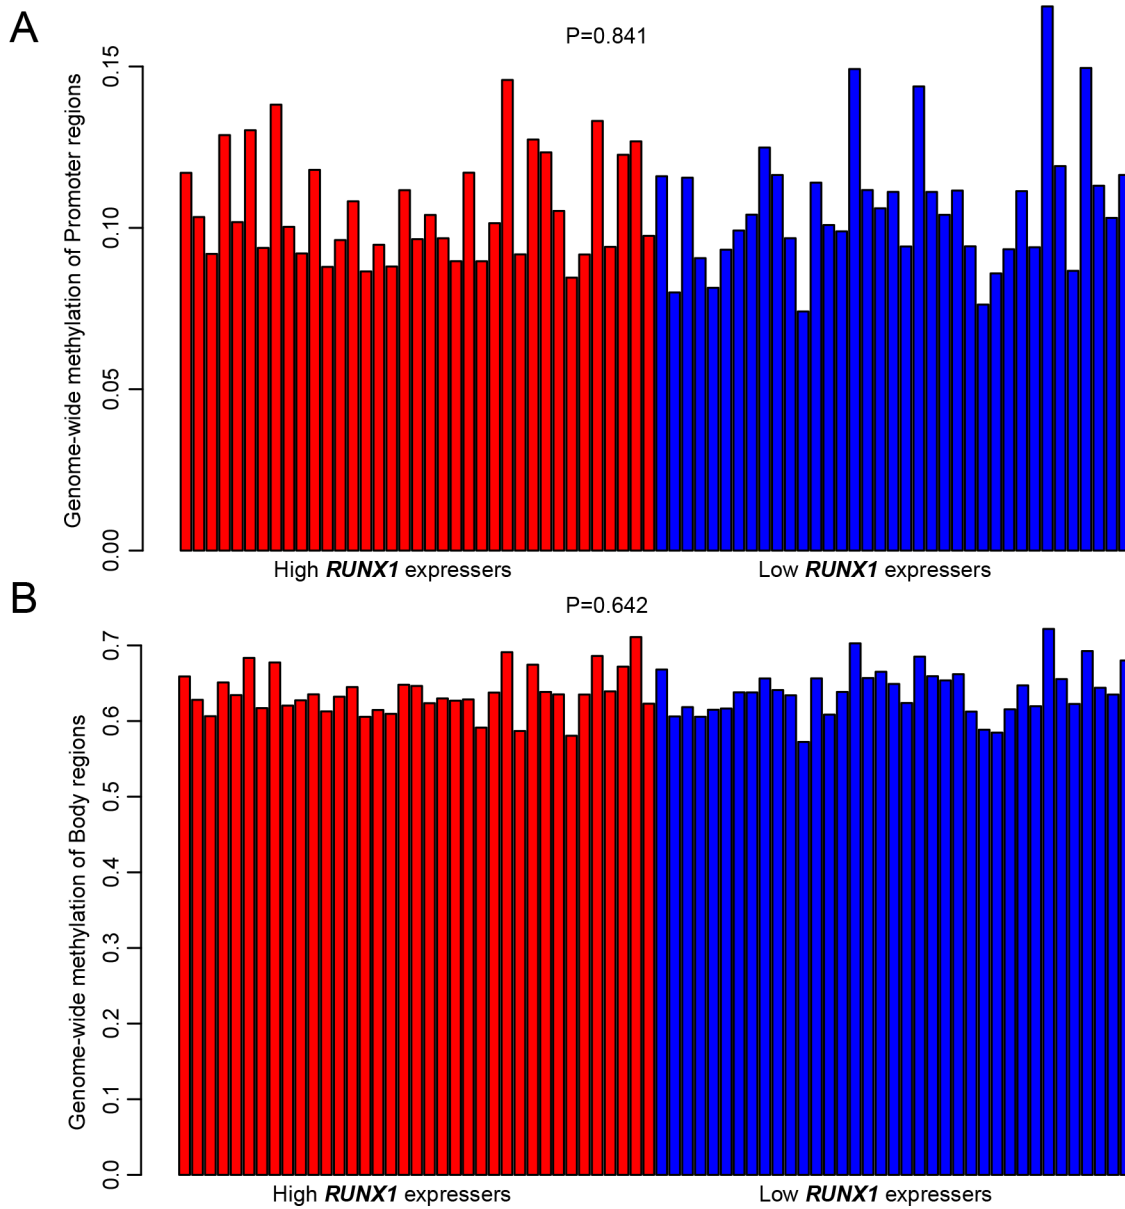

**Supplementary Figure S3: Genome-wide methylation profiling associated with RUNX1 expression.** (A) Gene promoter methylation profiling and (B) Gene body methylation profiling associated with RUNX1 expression.

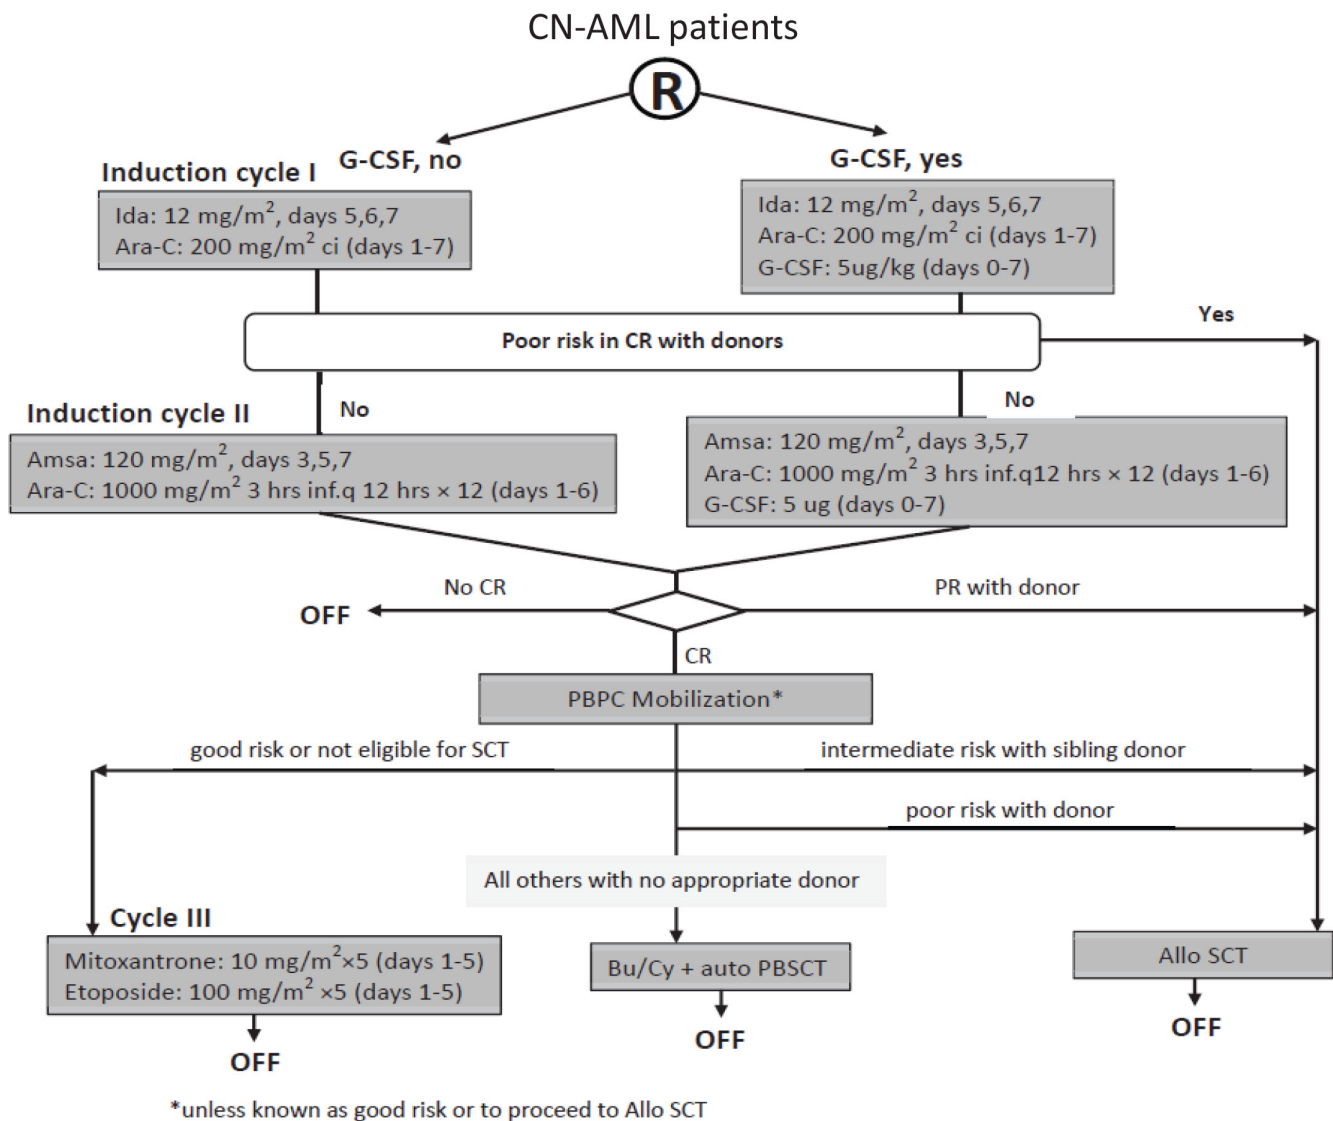

**Supplementary Figure S4: Therapeutic strategies of CN-AML patients.**

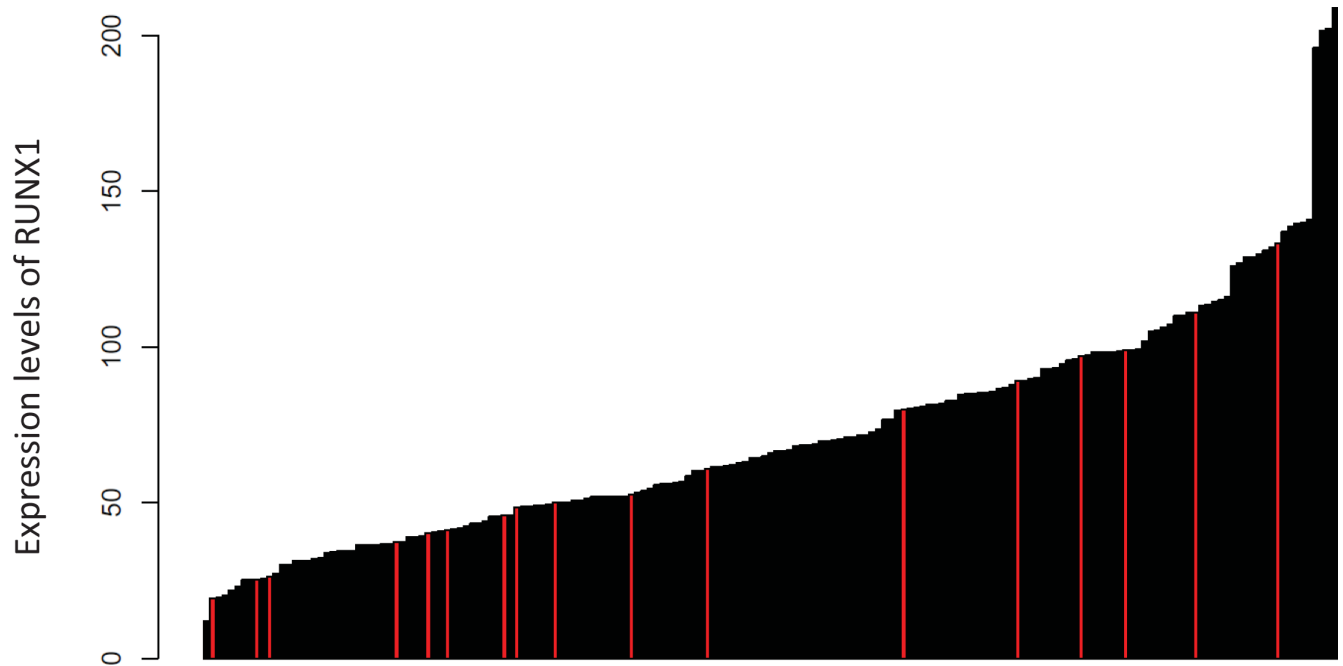

Supplementary Figure S5: *RUNX1* expression is normally distributed.
